# Supplementary material for: Dienylation of N-benzoylhydrazones with CF3-substituted homoallenylboronates in water
Source: Royal Society of Chemistry journal article supplement (doi:10.1039/d1ob02335g), 2022-01-01
Supplement: d1ob02335g1.pdf [file d1ob02335g1.pdf]

# Supporting Information

## Dienylation of *N*-benzoylhydrazones with CF<sub>3</sub>-substituted Homoallenylboronates in Water.

Wei-Wei Ma,<sup>a</sup> Chao Yang,<sup>a</sup> Qiang Xie,<sup>\*, a</sup> and Yun-He Xu<sup>\*, a, b</sup>

<sup>a</sup>Department of Chemistry, University of Science and Technology of China, Hefei, Anhui 230026, PR  
China

<sup>b</sup>State Key Laboratory and Institute of Elemento-Organic Chemistry, Nankai University, Tianjin  
300071, PR China

E-mail: xyh0709@ustc.edu.cn

---

## Table of contents

|                                                                                                 |           |
|-------------------------------------------------------------------------------------------------|-----------|
| <b>1. General Experimental Information .....</b>                                                | <b>3</b>  |
| <b>2. General Procedures .....</b>                                                              | <b>4</b>  |
| 2.1 Synthesis of Starting Materials.....                                                        | 4         |
| 2.2 General Procedure for the Reactions of Hydrazones with<br>Homoallylboronates in Water. .... | 5         |
| 2.3 General Procedure for Chirality Transfer and Derivatization<br>Reaction. ....               | 6         |
| 2.4 X-Ray Crystallographic Data of <b>6</b> .....                                               | 8         |
| <b>3. Characterization Data and Spectrum of Products. ....</b>                                  | <b>9</b>  |
| <b>4. References.....</b>                                                                       | <b>74</b> |

---

## 1. General Experimental Information

Unless otherwise noted, reagents were used as supplied commercially without further purification.  $^1\text{H}$  NMR,  $^{11}\text{B}$  NMR,  $^{19}\text{F}$  NMR and  $^{13}\text{C}$  NMR spectra were recorded at 25 °C on a Bruker Advance 400 M NMR spectrometers ( $\text{CDCl}_3$  as solvent). Chemical shifts of  $^1\text{H}$ ,  $^{11}\text{B}$ ,  $^{19}\text{F}$  and  $^{13}\text{C}$  NMR spectra are reported as  $\delta$  in units of parts per million (ppm) downfield from  $\text{SiMe}_4$  ( $\delta$  0.00) and relative to the signal of  $\text{SiMe}_4$  ( $\delta$  0.00 singlet). Multiplicities were given as: s (singlet); d (doublet); t (triplet); q (quartet); dd (doublet of doublets); dt (doublet of triplets); m (multiplets), etc. Coupling constants are reported as a  $J$  value in Hertz (Hz). The residual solvent signals were used as references and the chemical shifts were converted to the TMS scale ( $\text{CDCl}_3$ :  $\delta$  H = 7.26 ppm,  $\delta$  C = 77.16 ppm). High resolution mass spectral analysis (HRMS) was performed on Waters XEVO G2 Q-TOF or Thermo Scientific Q Exactive GC Orbitrap. Enantiomeric excesses of chiral compounds were determined by chiral high-performance liquid chromatography analyses which were performed on an Agilent 1260 Infinity equipped with a Daicel Chiralpak IC, IC-3 or Daicel Chiralcel OJ, OJ-3, OD-H, OD-3 column. Flash chromatography was performed using 200-300 mesh silica gel with the indicated solvent system. All hydrazones were prepared according to the literature procedures<sup>1</sup>.

## 2. General Procedures

### 2.1 Synthesis of Starting Materials.

The starting materials **2a-2i** were prepared according to the literature procedure<sup>2</sup>.

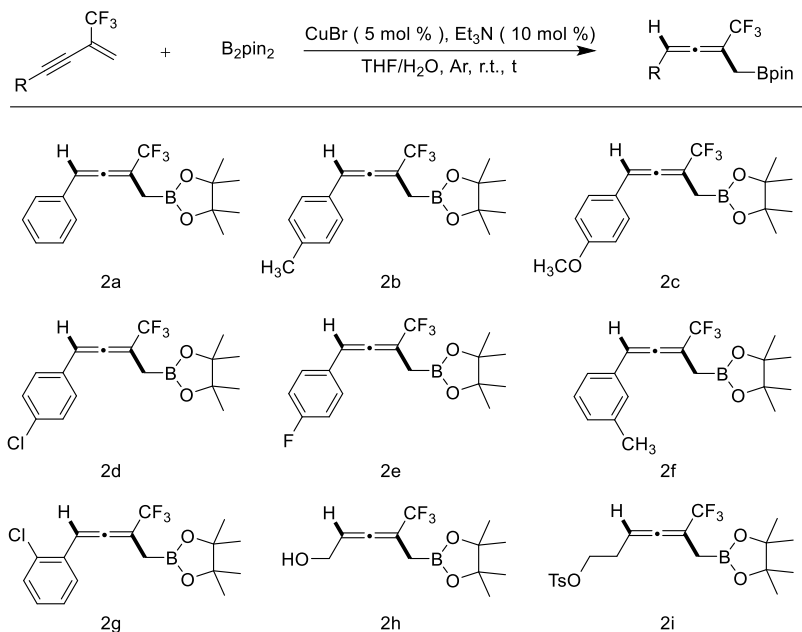

Under argon atmosphere,  $CuBr$  (5 mol %) and  $B_2pin_2$  (1.25 equiv) were added into a Schlenk tube. And then,  $THF/H_2O$  (2:1), triethylamine (10 mol %), and the corresponding enyne (1.0 equiv) were added sequentially. The mixture was stirred at room temperature, monitored by TLC to the end, diluted and extracted with DCM, washed by  $H_2O$ , dried over anhydrous  $Na_2SO_4$ . After concentration under vacuum, the residue was purified by flash column chromatography.

(**2a-2g** were synthesized according to the above general procedure; but **2h** and **2i** were synthesized by using 1,4-dioxane/ $H_2O$  = 2:1 as solvent.)

4,4,5,5-tetramethyl-2-(4-(*m*-tolyl)-2-(trifluoromethyl)buta-2,3-dien-1-yl)-1,3,2-dioxaborolane. (**2f**)

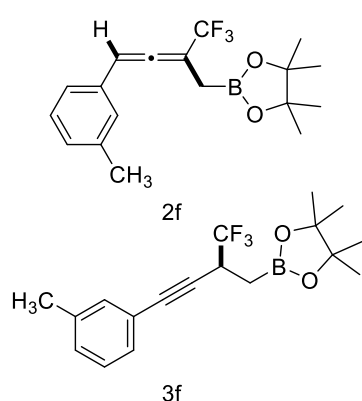

Pale yellow oil, (2f:3f = 97:3),  $R_f$  = 0.55 (ethyl acetate/petroleum ether 1:20).  $^1\text{H NMR}$  (400 MHz,  $\text{CDCl}_3$ )  $\delta$  7.23 – 7.18 (m, 1H), 7.18 – 7.14 (m, 2H), 7.09 – 7.03 (m, 1H), 6.54 – 6.45 (m, 1H), 2.34 (s, 3H), 1.92 – 1.79 (m, 2H), 1.22 (s, 6H), 1.19 (s, 6H).  $^{19}\text{F NMR}$  (376 MHz,  $\text{CDCl}_3$ )  $\delta$  -65.14, -65.15.  $^{11}\text{B NMR}$  (128 MHz,  $\text{CDCl}_3$ )  $\delta$  32.64.  $^{13}\text{C NMR}$  (101 MHz,  $\text{CDCl}_3$ )  $\delta$  204.47 (q,  $J$  = 4.1 Hz), 138.40, 132.27 (q,  $J$  = 1.1 Hz), 128.98, 128.65, 128.34, 125.00, 123.77 (q,  $J$  = 275.2 Hz), 100.66, 98.91 (q,  $J$  = 35.1 Hz), 84.04, 24.93, 24.78, 21.46. **HRMS (ESI)**:  $m/z$  calculated for  $\text{C}_{18}\text{H}_{23}\text{BF}_3\text{O}_2$   $[\text{M}+\text{H}]^+$ : 339.1743, found: 339.1740.

## 2.2 General Procedure for the Reactions of Hydrazones with Homoallylboronates in Water.

Procedure A:

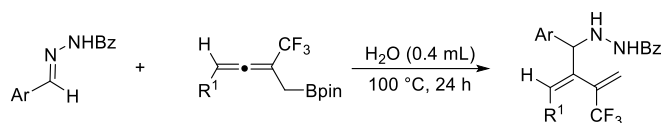

Under air atmosphere, aromatic hydrazone (0.2 mmol, 1.0 equiv), homoallylboronate (0.24 mmol, 1.2 equiv) and water (0.4 mL) were added into a Schlenk tube. The mixture was stirred at 100 °C for 24 h, diluted and extracted with DCM, washed with saturated brine, dried over anhydrous  $\text{Na}_2\text{SO}_4$ . After concentration under vacuum, the residue was purified by column chromatography over silica gel (200-300 mesh) or preparative thin layer chromatography using ethyl acetate/petroleum ether as eluent.

Procedure B:

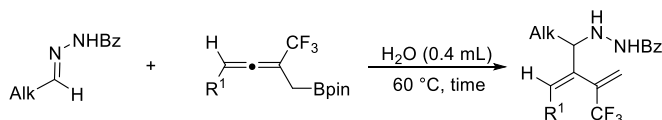

Under air atmosphere, aliphatic hydrazone (0.2 mmol, 1.0 equiv), homoallylboronate (0.22 mmol, 1.1 equiv) and water (0.4 mL) were added into a Schlenk tube. The mixture was stirred at 60 °C, monitored by TLC to the end, diluted and extracted with DCM, washed with saturated brine, dried over anhydrous  $\text{Na}_2\text{SO}_4$ . After concentration under vacuum, the residue was purified by column chromatography over silica gel (200-

300 mesh) or preparative thin layer chromatography using ethyl acetate/petroleum ether as eluent.

## 2.3 General Procedures for Chirality Transfer and Derivatization

### Reaction.

#### 2.3.1 General Procedure for Chirality Transfer

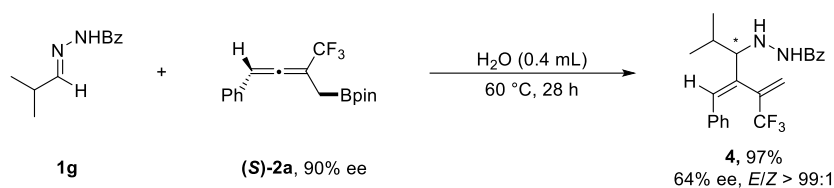

Under air atmosphere, hydrazone **1g** (0.2 mmol, 1.0 equiv), chiral homoallylboronate (**R**)-**2a** (0.24 mmol, 1.1 equiv) and water (0.4 mL) were added into a Schlenk tube. The mixture was stirred at 60 °C for 28 h, diluted and extracted with DCM, washed with saturated brine, dried over anhydrous Na<sub>2</sub>SO<sub>4</sub>. After concentration under vacuum, the residue was purified by column chromatography over silica gel (200-300 mesh) using ethyl acetate/petroleum ether as eluent to afford the product **4** as white solid (97% yield, 64% ee, *E/Z* > 99:1).

The enantiomeric excess of **4** was determined by chiral HPLC analysis on Daicel Chiralcel OD-H column. Conditions: hexane/isopropanol = 90:10, flow rate = 0.6 mL/min, column temperature = 25 °C, UV-Vis detection at  $\lambda = 254$  nm,  $t_{R1} = 14.314$  min (minor),  $t_{R2} = 18.605$  min (major).

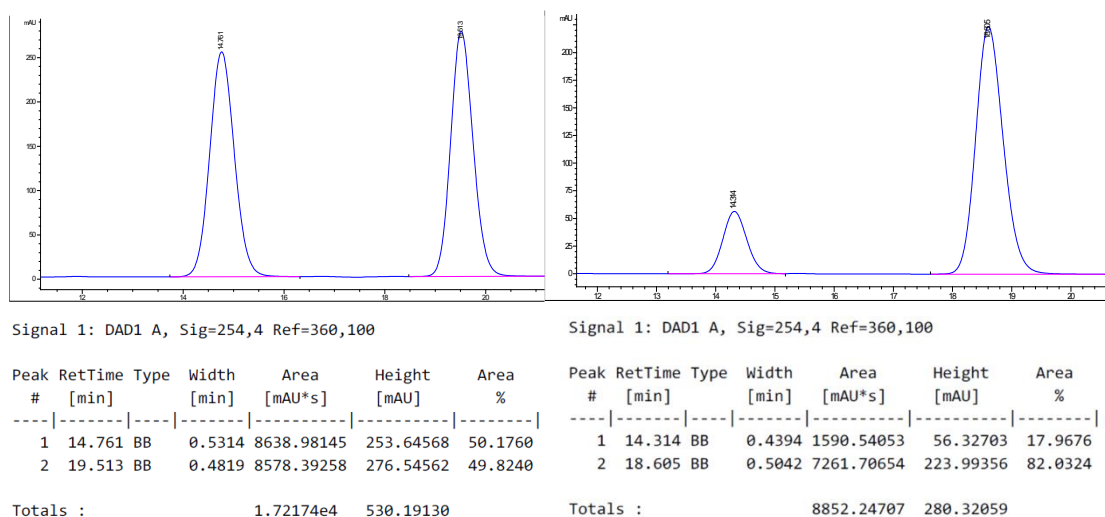

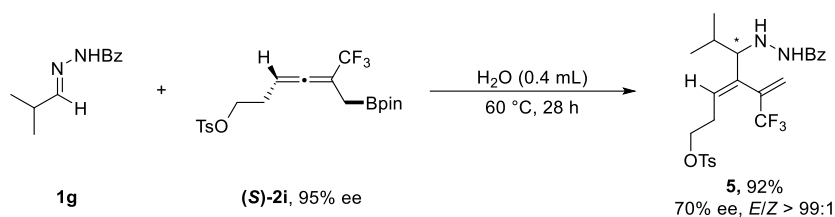

Under air atmosphere, hydrazone **1g** (0.2 mmol, 1.0 equiv), chiral homoallylboronate (**R**)-**2i** (0.24 mmol, 1.1 equiv) and water (0.4 mL) were added into a Schlenk tube. The mixture was stirred at 60 °C for 28 h, diluted and extracted with DCM, washed with saturated brine, dried over anhydrous Na<sub>2</sub>SO<sub>4</sub>. After concentration under vacuum, the residue was purified by column chromatography over silica gel (200-300 mesh) using ethyl acetate/petroleum ether as eluent to afford the product **5** as pale yellow solid (92% yield, 70% ee, *E/Z* > 99:1).

The enantiomeric excess of **5** was determined by chiral HPLC analysis on Daicel Chiralcel OD-H column. Conditions: hexane/isopropanol = 90:10, flow rate = 0.6 mL/min, column temperature = 25 °C, UV-Vis detection at  $\lambda = 254$  nm,  $t_{R1} = 19.186$  min (major),  $t_{R2} = 25.773$  min (minor).

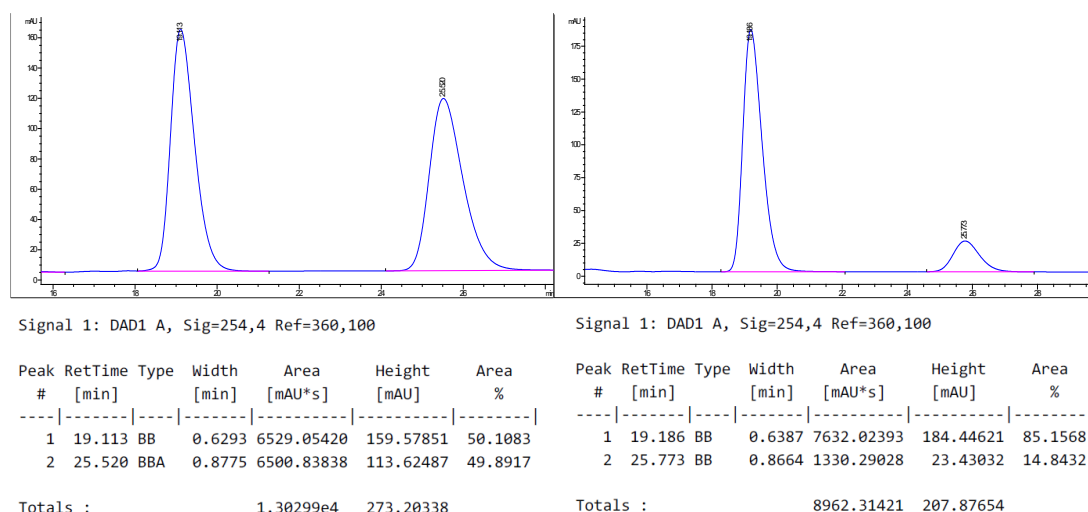

### 2.3.2 General Procedure for Derivatization Reaction of Compound **3ga**.

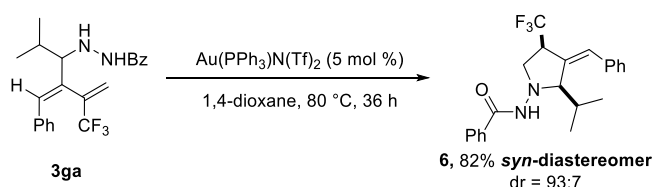

Under argon atmosphere, the 2-aminomethyl-1,3-diene derivative **3ga** (0.1 mmol, 1.0 equiv) were added into a Schlenk tube. After that, Au(PPh<sub>3</sub>)N(Tf)<sub>2</sub> (5 mol %) were added in the glove box. Then, 1, 4-dioxane (0.5 mL) was added and the mixture was

stirred at 80 °C for 36 h. When the reaction was finished, solvent was removed under vacuum and the crude residue was purified by preparative thin layer chromatography using isopropyl amine/petroleum ether (1:20) as eluent and the *syn* product **6** could be obtained as pale yellow solid in 82% yield (93:7 dr ratio was determined by <sup>1</sup>H NMR analysis of the crude reaction mixture).

## 2.4 X-Ray Crystallographic Data of **6**.

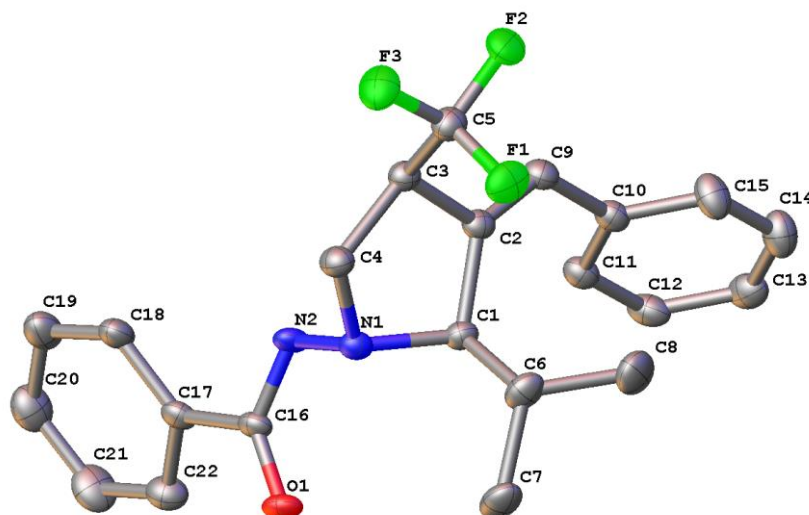

Table S1. Crystal data and structure refinement for **6**

|                       |                                                                 |
|-----------------------|-----------------------------------------------------------------|
| Identification code   | <b>6</b>                                                        |
| Empirical formula     | C <sub>22</sub> H <sub>23</sub> F <sub>3</sub> N <sub>2</sub> O |
| Formula weight        | 388.42                                                          |
| Temperature/K         | 170.04                                                          |
| Crystal system        | trigonal                                                        |
| Space group           | R3c                                                             |
| a/Å                   | 32.7473(4)                                                      |
| b/Å                   | 32.7473(4)                                                      |
| c/Å                   | 9.72720(10)                                                     |
| α/°                   | 90                                                              |
| β/°                   | 90                                                              |
| γ/°                   | 120                                                             |
| Volume/Å <sup>3</sup> | 9033.8(2)                                                       |



|                                                |                                                             |
|------------------------------------------------|-------------------------------------------------------------|
| Z                                              | 18                                                          |
| $\rho_{\text{calc}}/\text{cm}^3$               | 1.285                                                       |
| $\mu/\text{mm}^{-1}$                           | 0.529                                                       |
| F(000)                                         | 3672.0                                                      |
| Crystal size/ $\text{mm}^3$                    | $0.12 \times 0.08 \times 0.06$                              |
| Radiation                                      | GaK $\alpha$ ( $\lambda = 1.34139$ )                        |
| 2 $\Theta$ range for data collection/ $^\circ$ | 9.398 to 109.85                                             |
| Index ranges                                   | $-39 \leq h \leq 39, -39 \leq k \leq 39, -8 \leq l \leq 11$ |
| Reflections collected                          | 32549                                                       |
| Independent reflections                        | 3536 [Rint = 0.0488, Rsigma = 0.0267]                       |
| Data/restraints/parameters                     | 3536/1/255                                                  |
| Goodness-of-fit on F <sup>2</sup>              | 1.106                                                       |
| Final R indexes [ $I \geq 2\sigma(I)$ ]        | R <sub>1</sub> = 0.0336, wR <sub>2</sub> = 0.0729           |
| Final R indexes [all data]                     | R <sub>1</sub> = 0.0409, wR <sub>2</sub> = 0.0771           |
| Largest diff. peak/hole / e $\text{\AA}^{-3}$  | 0.11/-0.17                                                  |
| Flack parameter                                | -0.07(7)                                                    |

### 3. Characterization Data and Spectrum of Products.

(*E*)-*N'*-(2-benzylidene-1-phenyl-3-(trifluoromethyl)but-3-en-1-yl)benzohydrazide

(**3aa**)

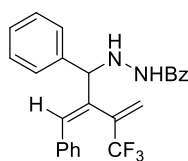

Following the general procedure A, **3aa** was obtained as white solid.

Yield = 84%, (*E/Z* > 99:1),  $R_f = 0.39$  (ethyl acetate/petroleum ether 1:4), mp 130–131 °C. <sup>1</sup>H NMR (400 MHz, CDCl<sub>3</sub>)  $\delta$  7.67 – 7.63 (m, 2H), 7.63 – 7.57 (d,  $J = 5.8$  Hz, 1H), 7.52 – 7.45 (m, 3H), 7.42 – 7.31 (m, 8H), 7.31 – 7.21 (m, 3H), 5.75 (q,  $J = 1.5$  Hz, 1H), 5.26 (d,  $J = 6.2$  Hz, 1H), 4.97 (q,  $J = 1.1$  Hz, 1H), 4.90 (s, 1H). <sup>19</sup>F NMR (376 MHz, CDCl<sub>3</sub>)  $\delta$  -63.90. <sup>13</sup>C NMR (101 MHz, CDCl<sub>3</sub>)  $\delta$  167.59, 138.26, 136.25 (q,  $J = 31.1$  Hz), 135.86, 134.73, 132.96, 131.99, 131.94, 129.16, 128.81, 128.73, 128.66, 128.41, 128.38, 127.84, 127.00, 125.48 (q,  $J = 5.1$  Hz), 123.06 (q,  $J = 275.5$

Hz), 69.04. **HRMS (ESI)**:  $m/z$  calculated for  $C_{25}H_{21}F_3N_2ONa$   $[M+Na]^+$ : 445.1504, found: 445.1509.

(*E*)-*N'*-(2-benzylidene-1-(*p*-tolyl)-3-(trifluoromethyl)but-3-en-1-yl)benzohydrazide

(**3ba**)

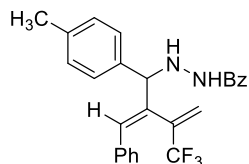

Following the general procedure A, **3ba** was obtained as white solid. Yield = 95%, (*E/Z* > 99:1),  $R_f$  = 0.41 (ethyl acetate/petroleum ether 1:4), mp 113–114 °C.  **$^1H$  NMR** (400 MHz,  $CDCl_3$ )  $\delta$  7.69 – 7.63 (m, 2H), 7.60 (d,  $J$  = 6.4 Hz, 1H), 7.52 – 7.46 (m, 1H), 7.43 – 7.35 (m, 5H), 7.35 – 7.33 (m, 1H), 7.33 – 7.27 (m, 3H), 7.26 – 7.21 (m, 1H), 7.16 (d,  $J$  = 7.8 Hz, 2H), 5.75 (q,  $J$  = 1.4 Hz, 1H), 5.23 (d,  $J$  = 6.7 Hz, 1H), 4.98 (q,  $J$  = 1.2 Hz, 1H), 4.85 (s, 1H), 2.34 (s, 3H).  **$^{19}F$  NMR** (376 MHz,  $CDCl_3$ )  $\delta$  -63.92.  **$^{13}C$  NMR** (101 MHz,  $CDCl_3$ )  $\delta$  167.51, 138.14, 136.30 (q,  $J$  = 31.1 Hz), 135.94, 135.19, 134.88, 133.02, 131.96, 131.69, 129.43, 129.16, 128.81, 128.58, 128.37, 127.79, 126.99, 125.41 (q,  $J$  = 5.1 Hz), 123.01 (q,  $J$  = 275.7 Hz), 68.79, 21.31. **HRMS (ESI)**:  $m/z$  calculated for  $C_{26}H_{23}F_3N_2ONa$   $[M+Na]^+$ : 459.1660, found: 459.1660.

(*E*)-*N'*-(2-benzylidene-1-(4-chlorophenyl)-3-(trifluoromethyl)but-3-en-1-yl)benzohydrazide (**3ca**)

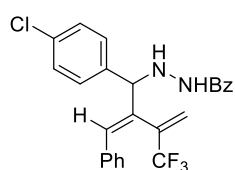

Following the general procedure A, **3ca** was obtained as white solid. Yield = 92%, (*E/Z* > 99:1),  $R_f$  = 0.39 (ethyl acetate/petroleum ether 1:4), mp 95–96 °C.  **$^1H$  NMR** (400 MHz,  $CDCl_3$ )  $\delta$  7.68 – 7.63 (m, 2H), 7.60 (s, 1H), 7.53 – 7.47 (m, 1H), 7.44 – 7.37 (m, 6H), 7.36 – 7.22 (m, 6H), 5.77 (q,  $J$  = 1.5 Hz, 1H), 5.20 (s, 1H), 5.01 – 4.97 (m, 1H), 4.89 (s, 1H).  **$^{19}F$  NMR** (376 MHz,  $CDCl_3$ )  $\delta$  -63.86.  **$^{13}C$  NMR** (101 MHz,  $CDCl_3$ )  $\delta$  167.73, 136.91, 136.15 (q,  $J$  = 31.2 Hz), 135.61, 134.40, 134.24, 132.77, 132.34, 132.14, 129.98, 129.16, 128.96, 128.88, 128.44, 128.01, 126.99, 125.69 (q,  $J$  = 5.0 Hz), 122.98 (q,  $J$  = 276.4 Hz), 68.33. **HRMS (ESI)**:  $m/z$  calculated for  $C_{25}H_{20}ClF_3N_2ONa$   $[M+Na]^+$ : 479.1114, found: 479.1104.

(*E*)-*N'*-(2-benzylidene-3-(trifluoromethyl)-1-(4-(trifluoromethyl)phenyl)but-3-en-1-yl)benzohydrazide (**3da**)

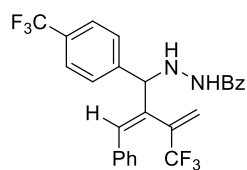

Following the general procedure A, **3da** was obtained as white solid. Yield = 75%, (*E/Z* > 99:1),  $R_f$  = 0.41 (ethyl acetate/petroleum ether 1:4), mp 41–42 °C.  $^1\text{H NMR}$  (400 MHz,  $\text{CDCl}_3$ )  $\delta$  7.67 – 7.63 (m, 3H), 7.62 – 7.57 (m, 4H), 7.53 – 7.48 (m, 1H), 7.43 – 7.36 (m, 4H), 7.33 – 7.28 (m, 3H), 7.28 – 7.23 (m, 1H), 5.79 (q,  $J$  = 1.3 Hz, 1H), 5.24 (dd,  $J$  = 6.6, 1.9 Hz, 1H), 5.0 – 4.97 (m, 2H).  $^{19}\text{F NMR}$  (376 MHz,  $\text{CDCl}_3$ )  $\delta$  -62.53, -63.81.  $^{13}\text{C NMR}$  (101 MHz,  $\text{CDCl}_3$ )  $\delta$  167.86, 142.56, 136.08 (q,  $J$  = 31.3 Hz), 135.47, 134.10, 132.97, 132.67, 132.21, 130.60 (q,  $J$  = 32.4 Hz), 129.16, 128.92, 128.90, 128.47, 128.12, 127.00, 125.85 (q,  $J$  = 5.1 Hz), 125.71 (q,  $J$  = 3.8 Hz), 124.15 (q,  $J$  = 273.3 Hz), 122.96 (q,  $J$  = 276.3 Hz), 68.54. **HRMS (ESI)**:  $m/z$  calculated for  $\text{C}_{26}\text{H}_{20}\text{F}_6\text{N}_2\text{ONa}$  [ $\text{M}+\text{Na}$ ] $^+$ : 513.1378, found: 513.1379.

(*E*)-*N'*-(2-benzylidene-1-(4-methoxyphenyl)-3-(trifluoromethyl)but-3-en-1-yl)benzohydrazide (**3ea**)

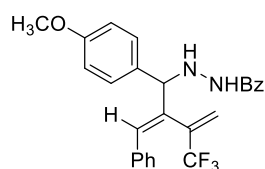

Following the general procedure A, **3ea** was obtained as white solid. Yield = 89%, (*E/Z* = 25:75),  $R_f$  = 0.27 (ethyl acetate/petroleum ether 1:4), mp 132–133 °C.  $^1\text{H NMR}$  (400 MHz,  $\text{CDCl}_3$ )  $\delta$  7.76–7.72 (m, 1H), 7.68 – 7.62 (m, 2H), 7.50 – 7.43 (m, 2H), 7.42 – 7.35 (m, 6H), 7.33 – 7.29 (m, 2H), 7.26 – 7.21 (m, 1H), 6.90 – 6.80 (m, 2H), 5.79 – 5.73 (m, 1H), 5.32 – 5.12 (m, 1H), 4.99 – 4.96 (m, 1H), 4.88 – 4.82 (m, 1H), 3.79 – 3.77 (m, 3H).  $^{19}\text{F NMR}$  (376 MHz,  $\text{CDCl}_3$ )  $\delta$  -63.95.  $^{13}\text{C NMR}$  (101 MHz,  $\text{CDCl}_3$ )  $\delta$  167.56, 159.61, 138.49, 136.32 (q,  $J$  = 31.3 Hz), 135.91, 134.90, 132.98, 131.92, 131.38, 130.17, 129.88, 129.12, 128.76, 128.35, 126.98, 125.34 (q,  $J$  = 5.1 Hz), 123.04 (q,  $J$  = 275.4 Hz), 114.03, 68.39, 55.33. **HRMS (ESI)**:  $m/z$  calculated for  $\text{C}_{26}\text{H}_{23}\text{F}_3\text{N}_2\text{O}_2\text{Na}$  [ $\text{M}+\text{Na}$ ] $^+$ : 475.1609, found: 475.1608.

(*E*)-*N'*-(2-benzylidene-1-(thiophen-2-yl)-3-(trifluoromethyl)but-3-en-1-yl)benzohydrazide (**3fa**)

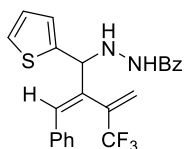

Following the general procedure A, **3fa** was obtained as pale yellow solid. Yield = 78%, (*E/Z* = 88:12),  $R_f$  = 0.37 (ethyl acetate/petroleum ether 1:4), mp 133–134 °C.  $^1\text{H NMR}$  (400 MHz,  $\text{CDCl}_3$ )  $\delta$  7.67 – 7.62 (m, 2H), 7.57 (d,  $J$  = 6.3 Hz, 1H), 7.52 – 7.43 (m, 4H), 7.43 – 7.39 (m, 2H), 7.37 – 7.28 (m, 3H), 7.24 (dt,  $J$  = 5.1, 1.0 Hz, 1H), 7.17 (d,  $J$  = 3.5 Hz, 1H), 7.00 (dd,  $J$  = 5.1, 3.5 Hz, 1H), 5.93 (q,  $J$  = 1.5 Hz, 1H), 5.24 (d,  $J$  = 6.6 Hz, 1H), 5.16 (q,  $J$  = 1.2 Hz, 1H), 4.88 (s, 1H).  $^{19}\text{F NMR}$  (376 MHz,  $\text{CDCl}_3$ )  $\delta$  -64.02.  $^{13}\text{C NMR}$  (101 MHz,  $\text{CDCl}_3$ )  $\delta$  167.62, 138.79, 138.23, 135.94 (q,  $J$  = 31.4 Hz), 132.94, 132.01, 131.98, 130.29, 128.83, 128.76, 128.59, 128.45, 127.11 (q,  $J$  = 4.9 Hz), 127.01, 126.83, 126.75, 125.06, 123.02 (q,  $J$  = 276.6 Hz), 68.77. **HRMS (ESI)**:  $m/z$  calculated for  $\text{C}_{23}\text{H}_{19}\text{F}_3\text{N}_2\text{OSNa}$   $[\text{M}+\text{Na}]^+$ : 451.1068, found: 451.1064.

(*E*)-*N'*-(2-(4-methylbenzylidene)-1-phenyl-3-(trifluoromethyl)but-3-en-1-yl)benzohydrazide (**3ab**)

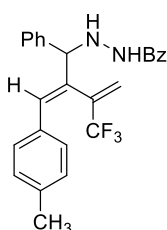

Following the general procedure A, **3ab** was obtained as white solid. Yield = 64%, (*E/Z* > 99:1),  $R_f$  = 0.41 (ethyl acetate/petroleum ether 1:4), mp 113–114 °C.  $^1\text{H NMR}$  (400 MHz,  $\text{CDCl}_3$ )  $\delta$  7.68 – 7.60 (m, 3H), 7.51 – 7.43 (m, 3H), 7.40 – 7.27 (m, 8H), 7.11 (s, 1H), 7.09 (s, 1H), 5.75 (q,  $J$  = 1.5 Hz, 1H), 5.25 (d,  $J$  = 6.6 Hz, 1H), 4.97 (q,  $J$  = 1.1 Hz, 1H), 4.88 (s, 1H), 2.32 (s, 3H).  $^{19}\text{F NMR}$  (376 MHz,  $\text{CDCl}_3$ )  $\delta$  -63.91.  $^{13}\text{C NMR}$  (101 MHz,  $\text{CDCl}_3$ )  $\delta$  167.55, 138.40, 137.82, 136.45 (q,  $J$  = 31.0 Hz), 133.64, 132.99, 132.93, 131.96, 131.91, 129.11, 128.80, 128.69, 128.65, 128.35, 127.00, 125.33 (q,  $J$  = 5.1 Hz), 123.11 (d,  $J$  = 276.7 Hz), 69.18, 21.32. **HRMS (ESI)**:  $m/z$  calculated for  $\text{C}_{26}\text{H}_{23}\text{F}_3\text{N}_2\text{ONa}$   $[\text{M}+\text{Na}]^+$ : 459.1660, found: 459.1662.

(*E*)-*N'*-(2-(4-methoxybenzylidene)-1-phenyl-3-(trifluoromethyl)but-3-en-1-yl)benzohydrazide (**3ac**)

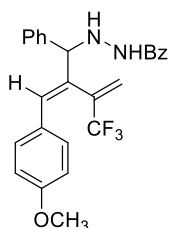

Following the general procedure A, **3ac** was obtained as white solid. Yield = 52%, (*E/Z* = 60:40),  $R_f$  = 0.31 (ethyl acetate/petroleum ether 1:4), mp 128–129 °C.  $^1\text{H NMR}$  (400 MHz,  $\text{CDCl}_3$ )  $\delta$  7.69 – 7.58 (m, 3H), 7.53 – 7.42 (m, 2H), 7.44 – 7.32 (m, 6H), 7.36 – 7.26 (m, 2H),

7.28 – 7.19 (m, 1H), 6.86 – 6.80 (m, 2H), 5.78 (q,  $J = 1.5$  Hz, 1H), 5.25 (d,  $J = 6.2$  Hz, 1H), 5.00 – 4.97 (m, 1H), 4.87 (s, 1H), 3.79 (s, 3H).  $^{19}\text{F}$  NMR (376 MHz,  $\text{CDCl}_3$ )  $\delta$  -64.01.  $^{13}\text{C}$  NMR (101 MHz,  $\text{CDCl}_3$ )  $\delta$  167.53, 159.32, 138.53, 136.57 (q,  $J = 31.0$  Hz), 135.93, 134.97, 133.01, 131.96, 131.52, 130.57, 129.90, 128.81, 128.69, 128.63, 126.99, 125.31 (q,  $J = 5.1$  Hz), 123.14 (q,  $J = 276.6$  Hz), 113.82, 69.35, 55.36. **HRMS (ESI):**  $m/z$  calculated for  $\text{C}_{26}\text{H}_{23}\text{F}_3\text{N}_2\text{O}_2\text{Na}$   $[\text{M}+\text{Na}]^+$ : 475.1609, found: 475.1608.

(*E*)-*N'*-(2-(4-chlorobenzylidene)-1-phenyl-3-(trifluoromethyl)but-3-en-1-yl)benzohydrazide (**3ad**)

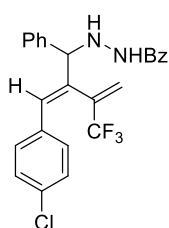

Following the general procedure A, **3ad** was obtained as white solid. Yield = 64%, (*E/Z* > 99:1),  $R_f = 0.36$  (ethyl acetate/petroleum ether 1:4), mp 107–108 °C.  $^1\text{H}$  NMR (400 MHz,  $\text{CDCl}_3$ )  $\delta$  7.66 – 7.62 (m, 2H), 7.61 (d,  $J = 6.3$  Hz, 1H), 7.52 – 7.47 (m, 1H), 7.47 – 7.43 (m, 2H), 7.42 – 7.27 (m, 9H), 7.26 – 7.23 (m, 1H), 5.76 (q,  $J = 1.4$  Hz, 1H), 5.23 (d,  $J = 6.0$  Hz, 1H), 4.96 (q,  $J = 1.2$  Hz, 1H), 4.89 (s, 1H).  $^{19}\text{F}$  NMR (376 MHz,  $\text{CDCl}_3$ )  $\delta$  -63.98.  $^{13}\text{C}$  NMR (101 MHz,  $\text{CDCl}_3$ )  $\delta$  167.68, 138.06, 136.02 (q,  $J = 31.2$  Hz), 135.49, 134.35, 133.60, 132.87, 132.01, 130.67, 130.36, 128.79, 128.76, 128.61, 128.56, 128.48, 126.99, 125.67 (q,  $J = 5.1$  Hz), 122.92 (q,  $J = 276.5$  Hz), 69.01. **HRMS (ESI):**  $m/z$  calculated for  $\text{C}_{25}\text{H}_{20}\text{ClF}_3\text{N}_2\text{ONa}$   $[\text{M}+\text{Na}]^+$ : 479.1114, found: 479.1113.

(*E*)-*N'*-(2-(4-fluorobenzylidene)-1-phenyl-3-(trifluoromethyl)but-3-en-1-yl)benzohydrazide (**3ae**)

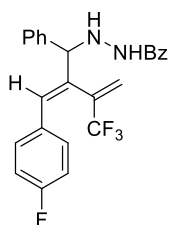

Following the general procedure A, **3ae** was obtained as white solid. Yield = 59%, (*E/Z* > 99:1),  $R_f = 0.33$  (ethyl acetate/petroleum ether 1:4), mp 128–129 °C.  $^1\text{H}$  NMR (400 MHz,  $\text{CDCl}_3$ )  $\delta$  7.67 – 7.62 (m, 2H), 7.59 (d,  $J = 6.6$  Hz, 1H), 7.52 – 7.44 (m, 3H), 7.42 – 7.31 (m, 7H), 7.28 (s, 1H), 7.01 – 6.95 (m, 2H), 5.77 (q,  $J = 1.4$  Hz, 1H), 5.28 – 5.20 (m, 1H), 4.97 (q,  $J = 1.2$  Hz, 1H), 4.89 (s, 1H).  $^{19}\text{F}$  NMR (376 MHz,  $\text{CDCl}_3$ )  $\delta$  -64.05, -113.64 (tt,  $J = 8.5, 5.4$  Hz).  $^{13}\text{C}$  NMR (101 MHz,  $\text{CDCl}_3$ )  $\delta$  167.63, 162.29 (d,  $J = 249.5$  Hz), 138.23, 136.15 (q,  $J = 31.2$  Hz), 134.60 (d,  $J = 1.0$  Hz), 132.94, 132.05, 131.95 (d,  $J = 3.5$  Hz),

130.87, 130.85, 130.79, 128.81 (d,  $J = 7.0$  Hz), 128.63, 128.47, 126.99, 125.65 (q,  $J = 5.1$  Hz), 123.00 (q,  $J = 276.4$  Hz), 115.38 (d,  $J = 21.5$  Hz), 69.15. **HRMS (ESI):**  $m/z$  calculated for  $C_{25}H_{20}F_4N_2ONa$   $[M+Na]^+$ : 463.1410, found: 463.1411.

(*E*)-*N'*-(2-(3-methylbenzylidene)-1-phenyl-3-(trifluoromethyl)but-3-en-1-yl)benzohydrazide (**3af**)

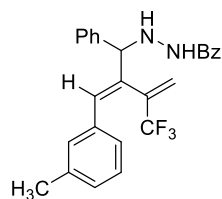

Following the general procedure A, **3af** was obtained as white solid. Yield = 71%, (*E/Z* > 99:1),  $R_f = 0.44$  (ethyl acetate/petroleum ether 1:4), mp 109–110 °C.  **$^1H$  NMR** (400 MHz,  $CDCl_3$ )  $\delta$  7.69 (d,  $J = 5.8$  Hz, 1H), 7.67 – 7.63 (m, 2H), 7.50 – 7.44 (m, 3H), 7.41 – 7.28 (m, 6H), 7.23 – 7.14 (m, 3H), 7.08 – 7.02 (m, 1H), 5.74 (q,  $J = 1.4$  Hz, 1H), 5.24 (d,  $J = 6.1$  Hz, 1H), 4.96 (q,  $J = 1.1$  Hz, 1H), 4.89 (s, 1H), 2.31 (s, 3H).  **$^{19}F$  NMR** (376 MHz,  $CDCl_3$ )  $\delta$  -63.79.  **$^{13}C$  NMR** (101 MHz,  $CDCl_3$ )  $\delta$  167.57, 138.31, 137.93, 136.38 (q,  $J = 31.1$  Hz), 135.76, 134.45, 132.96, 132.05, 131.96, 130.10, 128.78, 128.69, 128.64, 128.58, 128.37, 128.25, 127.00, 126.04, 125.38 (q,  $J = 5.1$  Hz), 123.08 (q,  $J = 276.4$  Hz), 69.07, 21.48. **HRMS (ESI):**  $m/z$  calculated for  $C_{26}H_{23}F_3N_2ONa$   $[M+Na]^+$ : 459.1660, found: 459.1664.

(*E*)-*N'*-(2-(2-chlorobenzylidene)-1-phenyl-3-(trifluoromethyl)but-3-en-1-yl)benzohydrazide (**3ag**)

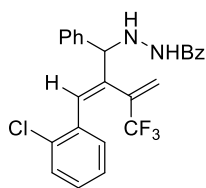

Following the general procedure A, **3ag** was obtained as white solid. Yield = 80%, (*E/Z* > 99:1),  $R_f = 0.49$  (ethyl acetate/petroleum ether 1:4), mp 116–118 °C.  **$^1H$  NMR** (400 MHz,  $CDCl_3$ )  $\delta$  7.82 (d,  $J = 6.5$  Hz, 1H), 7.74 – 7.66 (m, 2H), 7.57 – 7.46 (m, 4H), 7.44 – 7.29 (m, 6H), 7.27 – 7.23 (m, 1H), 7.23 – 7.13 (m, 2H), 5.63 (q,  $J = 1.5$  Hz, 1H), 5.26 (d,  $J = 5.8$  Hz, 1H), 4.95 – 4.89 (m, 2H).  **$^{19}F$  NMR** (376 MHz,  $CDCl_3$ )  $\delta$  -64.37.  **$^{13}C$  NMR** (101 MHz,  $CDCl_3$ )  $\delta$  167.53, 137.78, 137.29, 135.41 (q,  $J = 31.4$  Hz), 135.12, 133.93, 132.93, 131.99, 130.38, 129.48, 129.18, 128.91, 128.88, 128.81, 128.78, 128.56, 126.99, 126.62, 125.59 (q,  $J = 5.2$  Hz), 122.76 (q,  $J = 276.2$  Hz), 68.26. **HRMS (ESI):**  $m/z$  calculated for  $C_{25}H_{20}ClF_3N_2ONa$   $[M+Na]^+$ : 479.1114, found: 479.1109.

(*E*)-*N'*-(4-hydroxy-1-phenyl-2-(3,3,3-trifluoroprop-1-en-2-yl)but-2-en-1-yl)benzohydrazide (**3ah**)

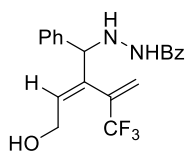

Following the general procedure A, **3ah** was obtained as white solid.

Yield = 35%, (*E/Z* > 99:1),  $R_f = 0.35$  (ethyl acetate/petroleum ether 1:2), mp 115–117 °C.  $^1\text{H NMR}$  (400 MHz,  $\text{CDCl}_3$ )  $\delta$  7.97 (s, 1H), 7.70 – 7.58 (m, 2H), 7.53 – 7.44 (m, 1H), 7.43 – 7.36 (m, 4H), 7.36 – 7.28 (m, 3H), 6.54 (t,  $J = 6.6$  Hz, 1H), 5.76 (q,  $J = 1.5$  Hz, 1H), 4.89 (s, 1H), 4.75 (s, 1H), 4.30 – 4.14 (m, 2H).  $^{19}\text{F NMR}$  (376 MHz,  $\text{CDCl}_3$ )  $\delta$  -65.67.  $^{13}\text{C NMR}$  (101 MHz,  $\text{CDCl}_3$ )  $\delta$  167.76, 138.07, 136.13, 134.95 (q,  $J = 31.3$  Hz), 132.93, 131.97, 131.82, 128.75, 128.72, 128.63, 128.44, 127.08, 124.44 (q,  $J = 5.2$  Hz), 122.74 (q,  $J = 275.5$  Hz), 67.89, 60.11. **HRMS (ESI)**:  $m/z$  calculated for  $\text{C}_{20}\text{H}_{19}\text{F}_3\text{N}_2\text{O}_2\text{Na}$   $[\text{M}+\text{Na}]^+$ : 399.1296, found: 399.1298.

(*E*)-4-((2-benzoylhydrazinyl)(phenyl)methyl)-5-(trifluoromethyl)hexa-3,5-dien-1-yl 4-methylbenzenesulfonate (**3ai**)

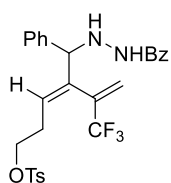

Following the general procedure A, **3ai** was obtained as white solid.

Yield = 33%, (*E/Z* > 99:1),  $R_f = 0.43$  (ethyl acetate/petroleum ether 1:2), mp 114–116 °C.  $^1\text{H NMR}$  (400 MHz,  $\text{CDCl}_3$ )  $\delta$  8.02 (s, 1H), 7.79 – 7.70 (m, 4H), 7.51 – 7.45 (m, 1H), 7.44 – 7.29 (m, 10H), 6.51 – 6.44 (m, 1H), 5.74 (q,  $J = 1.5$  Hz, 1H), 4.86 (q,  $J = 1.3$  Hz, 1H), 4.73 (s, 1H), 4.24 – 4.09 (m, 2H), 2.60 – 2.45 (m, 2H), 2.44 (s, 3H).  $^{19}\text{F NMR}$  (376 MHz,  $\text{CDCl}_3$ )  $\delta$  -65.69.  $^{13}\text{C NMR}$  (101 MHz,  $\text{CDCl}_3$ )  $\delta$  167.61, 145.12, 138.12, 137.33, 135.39 (q,  $J = 31.2$  Hz), 133.14, 132.92, 131.88, 130.06, 128.71, 128.70, 128.69, 128.40, 127.94, 127.55, 127.21, 124.45 (q,  $J = 5.4$  Hz), 122.82 (q,  $J = 275.6$  Hz), 69.57, 68.37, 29.13, 21.78. **HRMS (ESI)**:  $m/z$  calculated for  $\text{C}_{28}\text{H}_{27}\text{F}_3\text{N}_2\text{O}_4\text{SNa}$   $[\text{M}+\text{Na}]^+$ : 567.1541, found: 567.1535.

(*E*)-*N'*-(4-benzylidene-2-methyl-5-(trifluoromethyl)hex-5-en-3-yl)benzohydrazide

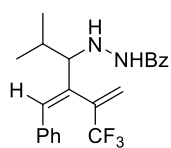

(**3ga**)

Following the general procedure B, **3ga** was obtained as white solid.

Yield = 96%, (*E/Z* > 99:1, and reaction time was extended to 28 h),

$R_f = 0.41$  (ethyl acetate/petroleum ether 1:4), mp 105–106 °C.  $^1\text{H NMR}$  (400 MHz,  $\text{CDCl}_3$ )  $\delta$  7.70 – 7.66 (m, 2H), 7.53 (s, 1H), 7.51 – 7.46 (m, 1H), 7.42 – 7.37 (m, 2H), 7.35 – 7.26 (m, 4H), 7.25 – 7.20 (m, 1H), 6.98 (s, 1H), 5.92 (q,  $J = 1.4$  Hz, 1H), 5.47 (q,  $J = 1.2$  Hz, 1H), 5.24 (s, 1H), 3.57 (d,  $J = 6.0$  Hz, 1H), 2.04–1.92 (m, 1H), 1.16 (d,  $J = 6.9$  Hz, 3H), 1.11 (d,  $J = 6.9$  Hz, 3H).  $^{19}\text{F NMR}$  (376 MHz,  $\text{CDCl}_3$ )  $\delta$  -62.96.  $^{13}\text{C NMR}$  (101 MHz,  $\text{CDCl}_3$ )  $\delta$  167.24, 137.37 (q,  $J = 30.9$  Hz), 136.11, 134.63, 133.85, 133.04, 131.86, 129.01, 128.80, 128.37, 127.58, 126.88, 125.19 (q,  $J = 5.2$  Hz), 123.20 (q,  $J = 276.5$  Hz), 70.59, 29.51, 20.36, 17.49. **HRMS (ESI):**  $m/z$  calculated for  $\text{C}_{22}\text{H}_{23}\text{F}_3\text{N}_2\text{ONa}$   $[\text{M}+\text{Na}]^+$ : 411.1660, found: 411.1657.

*(E)*-*N'*-(3-benzylidene-4-(trifluoromethyl)pent-4-en-2-yl)benzohydrazide (**3ha**)

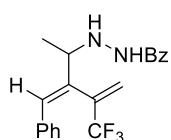

Following the general procedure B, **3ha** was obtained as white solid.

Yield = 99%, ( $E/Z > 99:1$ , and reaction time was extended to 28 h),  $R_f = 0.29$  (ethyl acetate/petroleum ether 1:4), mp 86–87 °C.  $^1\text{H NMR}$  (400 MHz,  $\text{CDCl}_3$ )  $\delta$  7.85 (s, 1H), 7.72 – 7.68 (m, 2H), 7.50 – 7.44 (m, 1H), 7.41 – 7.36 (m, 2H), 7.35 – 7.31 (m, 2H), 7.30 – 7.25 (m, 2H), 7.24 – 7.19 (m, 1H), 6.95 (s, 1H), 5.93 (q,  $J = 1.5$  Hz, 1H), 5.53–5.48 (m, 1H), 4.97 (s, 1H), 3.88 (q,  $J = 6.6$  Hz, 1H), 1.30 (d,  $J = 6.6$  Hz, 3H).  $^{19}\text{F NMR}$  (376 MHz,  $\text{CDCl}_3$ )  $\delta$  -63.50.  $^{13}\text{C NMR}$  (101 MHz,  $\text{CDCl}_3$ )  $\delta$  167.58, 136.86 (q,  $J = 31.2$  Hz), 136.50, 135.92, 132.94, 132.44, 131.92, 129.02, 128.78, 128.30, 127.67, 126.95, 124.92 (q,  $J = 5.1$  Hz), 123.07 (q,  $J = 276.3$  Hz), 60.90, 18.75. **HRMS (ESI):**  $m/z$  calculated for  $\text{C}_{20}\text{H}_{19}\text{F}_3\text{N}_2\text{ONa}$   $[\text{M}+\text{Na}]^+$ : 383.1347, found: 383.1344.

*(E)*-*N'*-(3-benzylidene-2-(trifluoromethyl)oct-1-en-4-yl)benzohydrazide (**3ia**)

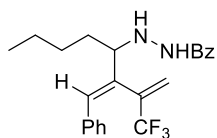

Following the general procedure B, **3ia** was obtained as white solid.

Yield = 99%, ( $E/Z > 99:1$ , and reaction time was extended to 28 h),  $R_f = 0.36$  (ethyl acetate/petroleum ether 1:4), mp 52–53 °C.  $^1\text{H NMR}$  (400 MHz,  $\text{CDCl}_3$ )  $\delta$  7.7 – 7.64 (m, 3H), 7.51 – 7.45 (m, 1H), 7.42 – 7.36 (m, 2H), 7.36 – 7.31 (m, 2H), 7.30 – 7.30 (m, 2H), 7.25 – 7.20 (m, 1H), 6.92 (s, 1H), 5.95 – 5.92 (m, 1H), 5.49 (s, 1H), 5.08 (s, 1H), 3.74 (t,  $J = 6.4$  Hz, 1H), 1.73 – 1.56 (m, 2H), 1.53 – 1.44 (m, 2H), 1.42 – 1.33 (m, 2H), 0.93 (t,  $J = 7.2$  Hz, 3H).  $^{19}\text{F}$



**NMR** (376 MHz, CDCl<sub>3</sub>)  $\delta$  -63.10. **<sup>13</sup>C NMR** (101 MHz, CDCl<sub>3</sub>)  $\delta$  167.40, 137.05 (q,  $J$  = 31.0 Hz), 135.95, 135.50, 133.40, 132.99, 131.91, 129.04, 128.80, 128.33, 127.67, 126.91, 125.00 (q,  $J$  = 5.1 Hz), 123.16 (q,  $J$  = 275.5 Hz), 65.99, 32.30, 28.17, 22.82, 14.07. **HRMS (ESI)**:  $m/z$  calculated for C<sub>23</sub>H<sub>25</sub>F<sub>3</sub>N<sub>2</sub>ONa [M+Na]<sup>+</sup>: 425.1817, found: 425.1820.

(*E*)-*N'*-(3-benzylidene-5-ethyl-2-(trifluoromethyl)hept-1-en-4-yl)benzohydrazide (**3ja**)

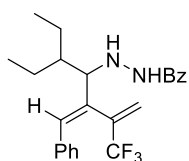

Following the general procedure B, **3ja** was obtained as white solid.

Yield = 96%, (*E/Z* > 99:1, and reaction time was extended to 40 h),

$R_f$  = 0.54 (ethyl acetate/petroleum ether 1:4), mp 64–66 °C. **<sup>1</sup>H NMR**

(400 MHz, CDCl<sub>3</sub>)  $\delta$  7.68 – 7.64 (m, 2H), 7.53 (s, 1H), 7.50 – 7.45

(m, 1H), 7.41 – 7.33 (m, 4H), 7.32 – 7.27 (m, 2H), 7.25 – 7.20 (m, 1H), 7.07 (s, 1H),

5.91 (q,  $J$  = 1.5 Hz, 1H), 5.40 (q,  $J$  = 1.2 Hz, 1H), 5.19 (s, 1H), 3.83 (d,  $J$  = 4.2 Hz, 1H),

1.78 – 1.68 (m, 1H), 1.66 – 1.58 (m, 2H), 1.50 – 1.42 (m, 1H), 1.38 – 1.25 (m, 1H),

1.05 – 0.99 (t,  $J$  = 7.4 Hz, 3H), 0.98 – 0.92 (m,  $J$  = 7.4 Hz, 3H). **<sup>19</sup>F NMR** (376 MHz,

CDCl<sub>3</sub>)  $\delta$  -63.12. **<sup>13</sup>C NMR** (101 MHz, CDCl<sub>3</sub>)  $\delta$  167.20, 137.24 (q,  $J$  = 30.7 Hz),

136.21, 134.97, 133.12, 132.96, 131.84, 129.02, 128.79, 128.38, 127.51, 126.90,

125.26 (q,  $J$  = 5.2 Hz), 123.14 (q,  $J$  = 275.6 Hz), 66.11, 42.22, 23.09, 20.51, 12.09,

12.01. **HRMS (ESI)**:  $m/z$  calculated for C<sub>24</sub>H<sub>27</sub>F<sub>3</sub>N<sub>2</sub>ONa [M+Na]<sup>+</sup>: 439.1973, found:

439.1972.

(*E*)-*N'*-(3-benzylidene-2-methyl-4-(trifluoromethyl)pent-4-en-2-yl)benzohydrazide

(**3ka**)

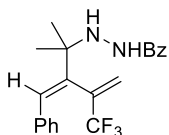

Following the general procedure B, **3ka** was obtained as white solid.

Yield = 91%, (*E/Z* > 99:1, and reaction time was extended to 40 h),

$R_f$  = 0.23 (ethyl acetate/petroleum ether 1:4), mp 99–101 °C. **<sup>1</sup>H NMR**

(400 MHz, CDCl<sub>3</sub>)  $\delta$  7.73 – 7.68 (m, 2H), 7.52 – 7.46 (m, 1H),

7.45 – 7.38 (m, 3H), 7.34 – 7.26 (m, 4H), 7.25 – 7.20 (m, 1H), 7.04 (s, 1H), 6.03 (q,  $J$

= 1.4 Hz, 1H), 5.65 (s, 1H), 1.41 (s, 6H). **<sup>19</sup>F NMR** (376 MHz, CDCl<sub>3</sub>)  $\delta$  -62.15. **<sup>13</sup>C**

**NMR** (101 MHz, CDCl<sub>3</sub>)  $\delta$  167.16, 138.71, 137.24 (q,  $J$  = 31.9 Hz), 136.30, 132.95,

132.50, 131.93, 129.11, 128.87, 128.25, 127.66, 126.86, 125.86 (q,  $J$  = 4.8 Hz), 123.12

(q,  $J = 276.4$  Hz), 61.44, 26.01. **HRMS (ESI)**:  $m/z$  calculated for  $C_{21}H_{21}F_3N_2ONa$   $[M+Na]^+$ : 397.1504, found: 397.1503.

(*E*)-*N'*-(2-benzylidene-1-cyclohexyl-3-(trifluoromethyl)but-3-en-1-yl)benzohydrazide  
**(3la)**

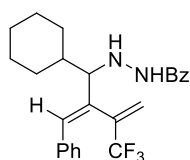

Following the general procedure B, **3la** was obtained as white solid. Yield = 93%, (*E/Z* > 99:1, and reaction time was extended to 36 h),  $R_f = 0.49$  (ethyl acetate/petroleum ether 1:4), mp 121–122 °C.  **$^1H$  NMR** (400 MHz,  $CDCl_3$ )  $\delta$  7.70 – 7.65 (m, 2H), 7.62 – 7.55 (d,  $J = 6.4$  Hz, 1H), 7.50 – 7.44 (m, 1H), 7.41 – 7.36 (m, 2H), 7.35 – 7.31 (m, 2H), 7.31 – 7.25 (m, 2H), 7.25 – 7.19 (m, 1H), 6.94 (s, 1H), 5.93 (q,  $J = 1.5$  Hz, 1H), 5.47 (q,  $J = 1.1$  Hz, 1H), 5.26 (d,  $J = 6.1$  Hz, 1H), 3.57 (d,  $J = 6.1$  Hz, 1H), 2.02 – 1.93 (m, 1H), 1.89 – 1.76 (m, 3H), 1.72 – 1.57 (m, 2H), 1.38 – 1.12 (m, 5H).  **$^{19}F$  NMR** (376 MHz,  $CDCl_3$ )  $\delta$  -62.91.  **$^{13}C$  NMR** (101 MHz,  $CDCl_3$ )  $\delta$  167.11, 137.35 (q,  $J = 31.0$  Hz), 136.08, 134.18, 133.97, 133.02, 131.83, 129.02, 128.77, 128.34, 127.57, 126.87, 125.16 (q,  $J = 5.1$  Hz), 123.21 (q,  $J = 276.5$  Hz), 70.31, 39.31, 30.89, 27.99, 26.55, 26.52, 26.50. **HRMS (ESI)**:  $m/z$  calculated for  $C_{25}H_{27}F_3N_2ONa$   $[M+Na]^+$ : 451.1973, found: 451.1984.

(*E*)-*N'*-(4-benzylidene-1-phenyl-5-(trifluoromethyl)hex-5-en-3-yl)benzohydrazide  
**(3ma)**

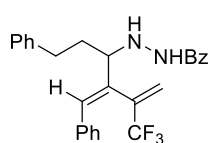

Following the general procedure B, **3ma** was obtained as white solid. Yield = 99%, (*E/Z* > 99:1, and reaction time was extended to 32 h),  $R_f = 0.28$  (ethyl acetate/petroleum ether 1:4), mp 69–70 °C.  **$^1H$  NMR** (400 MHz,  $CDCl_3$ )  $\delta$  7.71 – 7.66 (m, 2H), 7.62 (s, 1H), 7.51 – 7.46 (m, 1H), 7.42 – 7.36 (m, 2H), 7.35 – 7.26 (m, 6H), 7.25 – 7.22 (m, 2H), 7.21 – 7.16 (m, 2H), 6.95 (s, 1H), 5.94 (q,  $J = 1.5$  Hz, 1H), 5.52 (s, 1H), 5.12 (s, 1H), 3.83 (t,  $J = 6.3$  Hz, 1H), 2.88 – 2.76 (m, 2H), 2.05 – 1.89 (m, 2H).  **$^{19}F$  NMR** (376 MHz,  $CDCl_3$ )  $\delta$  -63.03.  **$^{13}C$  NMR** (101 MHz,  $CDCl_3$ )  $\delta$  167.50, 141.62, 136.92 (q,  $J = 31.2$  Hz), 135.81, 134.92, 133.92, 132.90, 131.98, 129.06, 128.83, 128.60, 128.47, 128.38, 127.78, 126.92, 126.15, 125.27 (q,  $J = 5.1$  Hz), 123.14 (q,  $J = 276.1$  Hz), 65.77, 34.20, 32.31. **HRMS (ESI)**:  $m/z$  calculated for  $C_{27}H_{25}F_3N_2ONa$   $[M+Na]^+$ : 473.1817, found: 473.1809.

Ethyl (*E*)-2-(2-benzoylhydrazinyl)-3-benzylidene-4-(trifluoromethyl)pent-4-enoate  
(**3na**)

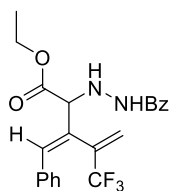

Following the general procedure B, **3na** was obtained as white solid. Yield = 96%, (*E/Z* > 99:1, and reaction time was extended to 36 h),  $R_f = 0.13$  (ethyl acetate/petroleum ether 1:4), mp 100–101 °C.  $^1\text{H NMR}$  (400 MHz,  $\text{CDCl}_3$ )  $\delta$  8.11 (d,  $J = 5.7$  Hz, 1H), 7.77 – 7.71 (m, 2H), 7.53 – 7.47 (m, 1H), 7.45 – 7.38 (m, 2H), 7.34 – 7.21 (m, 5H), 6.98 (s, 1H), 5.99 (s, 1H), 5.70 (s, 1H), 5.43 (d,  $J = 3.9$  Hz, 1H), 4.56 (s, 1H), 4.27 – 4.27 (m, 2H), 1.26 (t,  $J = 7.2$  Hz, 3H).  $^{19}\text{F NMR}$  (376 MHz,  $\text{CDCl}_3$ )  $\delta$  -63.83.  $^{13}\text{C NMR}$  (101 MHz,  $\text{CDCl}_3$ )  $\delta$  170.53, 167.36, 137.04, 136.04 (q,  $J = 31.6$  Hz), 135.13, 132.55, 132.09, 129.12, 129.00, 128.79, 128.35, 128.29, 127.03, 126.11 (q,  $J = 5.0$  Hz), 112.87 (q,  $J = 276.3$  Hz), 67.63, 61.69, 14.10. **HRMS (ESI)**:  $m/z$  calculated for  $\text{C}_{22}\text{H}_{21}\text{F}_3\text{N}_2\text{O}_3\text{Na}$  [ $\text{M}+\text{Na}$ ] $^+$ : 441.1402, found: 441.1394.

(*E*)-*N'*-(2-methyl-4-(4-methylbenzylidene)-5-(trifluoromethyl)hex-5-en-3-yl)benzohydrazide (**3gb**)

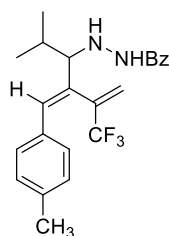

Following the general procedure B, **3gb** was obtained as white solid. Yield = 91%, (*E/Z* > 99:1, and reaction time was extended to 28 h),  $R_f = 0.40$  (ethyl acetate/petroleum ether 1:4), mp 76–77 °C.  $^1\text{H NMR}$  (400 MHz,  $\text{CDCl}_3$ )  $\delta$  7.72 – 7.63 (m, 2H), 7.53 – 7.45 (m, 2H), 7.43 – 7.35 (m, 2H), 7.27 – 7.22 (m, 2H), 7.10 (d,  $J = 7.9$  Hz, 2H), 6.92 (s, 1H), 5.92 (q,  $J = 1.4$  Hz, 1H), 5.48 (q,  $J = 1.2$  Hz, 1H), 5.24 (s, 1H), 3.54 (d,  $J = 6.1$  Hz, 1H), 2.32 (s, 3H), 2.03 – 1.90 (m, 1H), 1.14 (d,  $J = 6.8$  Hz, 3H), 1.11 (d,  $J = 6.8$  Hz, 3H).  $^{19}\text{F NMR}$  (376 MHz,  $\text{CDCl}_3$ )  $\delta$  -62.97.  $^{13}\text{C NMR}$  (101 MHz,  $\text{CDCl}_3$ )  $\delta$  167.18, 137.58 (q,  $J = 30.8$  Hz), 137.57, 133.85, 133.60, 133.16, 133.10, 131.86, 129.11, 129.00, 128.81, 126.88, 125.05 (q,  $J = 5.1$  Hz), 123.27 (q,  $J = 275.5$  Hz), 70.89, 29.51, 21.30, 20.41, 17.57. **HRMS (ESI)**:  $m/z$  calculated for  $\text{C}_{23}\text{H}_{25}\text{F}_3\text{N}_2\text{ONa}$  [ $\text{M}+\text{Na}$ ] $^+$ : 425.1817, found: 425.1817.

(*E*)-*N'*-(4-(4-methoxybenzylidene)-2-methyl-5-(trifluoromethyl)hex-5-en-3-

yl)benzohydrazide (**3gc**)

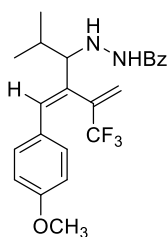

Following the general procedure B, **3gc** was obtained as white solid. Yield = 91%, (*E/Z* > 99:1, and reaction time was extended to 28 h),  $R_f$  = 0.30 (ethyl acetate/petroleum ether 1:4), mp 40–42 °C.  $^1\text{H NMR}$  (400 MHz,  $\text{CDCl}_3$ )  $\delta$  7.69 – 7.64 (m, 2H), 7.53 (m, 1H), 7.50 – 7.45 (m, 1H), 7.42 – 7.35 (m, 2H), 7.33 – 7.27 (m, 2H), 6.88 (s, 1H), 6.85 – 6.80 (m, 2H), 5.95 (q,  $J$  = 1.4 Hz, 1H), 5.53–5.48 (m, 1H), 5.23 (d,  $J$  = 5.3 Hz, 1H), 3.79 (s, 3H), 3.52 (d,  $J$  = 6.2 Hz, 1H), 1.96 (dq,  $J$  = 13.5, 6.8 Hz, 1H), 1.13 (d,  $J$  = 6.9 Hz, 3H), 1.11 (d,  $J$  = 6.9 Hz, 3H).  $^{19}\text{F NMR}$  (376 MHz,  $\text{CDCl}_3$ )  $\delta$  -63.03.  $^{13}\text{C NMR}$  (101 MHz,  $\text{CDCl}_3$ )  $\delta$  167.16, 159.13, 137.69 (q,  $J$  = 30.7 Hz), 133.41, 133.10, 132.30, 131.83, 130.40, 128.79, 128.52, 126.87, 124.97 (q,  $J$  = 5.1 Hz), 123.29 (q,  $J$  = 276.6 Hz), 113.80, 71.08, 55.34, 29.52, 20.43, 17.62. **HRMS (ESI)**:  $m/z$  calculated for  $\text{C}_{23}\text{H}_{25}\text{F}_3\text{N}_2\text{O}_2\text{Na}$   $[\text{M}+\text{Na}]^+$ : 441.1766, found: 441.1766.

(*E*)-*N'*-(4-(4-chlorobenzylidene)-2-methyl-5-(trifluoromethyl)hex-5-en-3-yl)benzohydrazide (**3gd**)

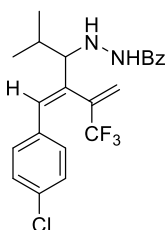

Following the general procedure B, **3gd** was obtained as white solid. Yield = 94%, (*E/Z* > 99:1, and reaction time was extended to 28 h),  $R_f$  = 0.35 (ethyl acetate/petroleum ether 1:4), mp 102–104 °C.  $^1\text{H NMR}$  (400 MHz,  $\text{CDCl}_3$ )  $\delta$  7.70 – 7.64 (m, 2H), 7.57 (d,  $J$  = 5.0 Hz, 1H), 7.52 – 7.46 (m, 1H), 7.43 – 7.36 (m, 2H), 7.24 (s, 4H), 6.92 (s, 1H), 5.92 (q,  $J$  = 1.4 Hz, 1H), 5.48 – 5.46 (m, 1H), 5.21 (d,  $J$  = 5.9 Hz, 1H), 3.56 (d,  $J$  = 5.9 Hz, 1H), 1.96 (m, 1H), 1.14 (d,  $J$  = 6.9 Hz, 3H), 1.09 (d,  $J$  = 6.9 Hz, 3H).  $^{19}\text{F NMR}$  (376 MHz,  $\text{CDCl}_3$ )  $\delta$  -63.04.  $^{13}\text{C NMR}$  (101 MHz,  $\text{CDCl}_3$ )  $\delta$  167.32, 137.19 (q,  $J$  = 30.9 Hz), 135.44, 134.60, 133.35, 132.98, 132.53, 131.92, 130.24, 128.81, 128.57, 126.87, 125.37 (q,  $J$  = 5.2 Hz), 123.09 (q,  $J$  = 275.7 Hz), 70.54, 29.49, 20.35, 17.46. **HRMS (ESI)**:  $m/z$  calculated for  $\text{C}_{22}\text{H}_{22}\text{ClF}_3\text{N}_2\text{ONa}$   $[\text{M}+\text{Na}]^+$ : 445.1270, found: 445.1261.

(*E*)-*N'*-(4-(4-fluorobenzylidene)-2-methyl-5-(trifluoromethyl)hex-5-en-3-yl)benzohydrazide (**3ge**)

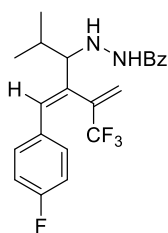

Following the general procedure B, **3ge** was obtained as white solid.

Yield = 93%, (*E/Z* > 99:1, and reaction time was extended to 28 h),

$R_f$  = 0.35 (ethyl acetate/petroleum ether 1:4), mp 126–127 °C.  $^1\text{H}$

**NMR** (400 MHz,  $\text{CDCl}_3$ )  $\delta$  7.71 – 7.64 (m, 2H), 7.54 – 7.46 (m, 2H),

7.44 – 7.37 (m, 2H), 7.32 – 7.26 (m, 2H), 7.01 – 6.94 (m, 2H), 6.92

(s, 1H), 5.94 (q,  $J$  = 1.4 Hz, 1H), 5.48 (q,  $J$  = 1.2 Hz, 1H), 5.22 (d,  $J$  = 6.1 Hz, 1H), 3.55

(d,  $J$  = 6.1 Hz, 1H), 2.03 – 1.91 (m, 1H), 1.15 (d,  $J$  = 6.9 Hz, 3H), 1.11 (d,  $J$  = 6.8 Hz,

3H).  $^{19}\text{F}$  **NMR** (376 MHz,  $\text{CDCl}_3$ )  $\delta$  -63.08, -114.03 (tt,  $J$  = 8.6, 5.4 Hz).  $^{13}\text{C}$  **NMR**

(101 MHz,  $\text{CDCl}_3$ )  $\delta$  167.29, 162.13 (d,  $J$  = 247.6 Hz), 137.32 (q,  $J$  = 30.9 Hz), 134.55

(d,  $J$  = 1.5 Hz), 133.05, 132.70, 132.18 (d,  $J$  = 3.5 Hz), 131.93, 130.67 (d,  $J$  = 8.0 Hz),

128.85, 126.87, 125.31 (q,  $J$  = 5.2 Hz), 123.16 (q,  $J$  = 276.4 Hz), 115.36 (d,  $J$  = 21.4

Hz), 70.77, 29.51, 20.40, 17.55. **HRMS (ESI)**:  $m/z$  calculated for  $\text{C}_{22}\text{H}_{22}\text{F}_4\text{N}_2\text{ONa}$

$[\text{M}+\text{Na}]^+$ : 429.1566, found: 429.1563.

(*E*)-*N'*-(2-methyl-4-(3-methylbenzylidene)-5-(trifluoromethyl)hex-5-en-3-

yl)benzohydrazide (**3gf**)

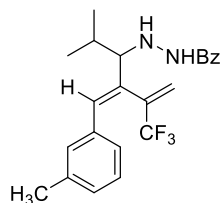

Following the general procedure B, **3gf** was obtained as white solid.

Yield = 97%, (*E/Z* > 99:1, and reaction time was extended to 28 h),

$R_f$  = 0.38 (ethyl acetate/petroleum ether 1:4), mp 100–101 °C.  $^1\text{H}$

**NMR** (400 MHz, Chloroform-*d*)  $\delta$  7.70 – 7.65 (m, 2H), 7.61 (s, 1H),

7.50 – 7.44 (m, 1H), 7.41 – 7.35 (m, 2H), 7.20 – 7.11 (m, 3H), 7.07 – 7.00 (m, 1H),

6.94 (s, 1H), 5.90 (q,  $J$  = 1.4 Hz, 1H), 5.47 (q,  $J$  = 1.2 Hz, 1H), 5.24 (s, 1H), 3.55 (d,  $J$

= 6.0 Hz, 1H), 2.31 (s, 3H), 2.04 – 1.90 (m, 1H), 1.15 (d,  $J$  = 6.9 Hz, 3H), 1.10 (d,  $J$  =

6.9 Hz, 3H).  $^{19}\text{F}$  **NMR** (376 MHz,  $\text{CDCl}_3$ )  $\delta$  -62.86.  $^{13}\text{C}$  **NMR** (101 MHz,  $\text{CDCl}_3$ )  $\delta$

167.20, 137.91, 137.50 (q,  $J$  = 30.7 Hz), 136.02, 134.32, 133.96, 133.05, 131.82, 129.93,

128.76, 128.32, 128.23, 126.88, 125.92, 125.09 (q,  $J$  = 5.2 Hz), 123.23 (q,  $J$  = 276.5

Hz), 70.65, 29.49, 21.44, 20.34, 17.49. **HRMS (ESI)**:  $m/z$  calculated for

$\text{C}_{23}\text{H}_{25}\text{F}_3\text{N}_2\text{ONa}$   $[\text{M}+\text{Na}]^+$ : 425.1817, found: 425.1813.

(*E*)-*N'*-(4-(2-chlorobenzylidene)-2-methyl-5-(trifluoromethyl)hex-5-en-3-

yl)benzohydrazide (**3gg**)

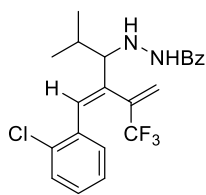

Following the general procedure B, **3gg** was obtained as white solid. Yield = 95%, (*E/Z* > 99:1, and reaction time was extended to 28 h),  $R_f$  = 0.43 (ethyl acetate/petroleum ether 1:4), mp 116–118 °C.  $^1\text{H NMR}$  (400 MHz,  $\text{CDCl}_3$ )  $\delta$  7.76 – 7.67 (m, 3H), 7.52 – 7.45 (m, 1H), 7.44 – 7.32 (m, 3H), 7.24 – 7.13 (m, 4H), 5.80 (q,  $J$  = 1.4 Hz, 1H), 5.39 (q,  $J$  = 1.2 Hz, 1H), 5.26 (s, 1H), 3.67 (d,  $J$  = 5.2 Hz, 1H), 2.11 – 1.95 (m, 1H), 1.21 (d,  $J$  = 6.9 Hz, 3H), 1.12 (d,  $J$  = 6.9 Hz, 3H).  $^{19}\text{F NMR}$  (376 MHz,  $\text{CDCl}_3$ )  $\delta$  -63.38.  $^{13}\text{C NMR}$  (101 MHz,  $\text{CDCl}_3$ )  $\delta$  167.24, 137.25, 136.67 (q,  $J$  = 30.9 Hz), 135.54, 133.73, 133.05, 131.85, 131.50, 130.40, 129.18, 128.77, 128.71, 126.89, 126.59, 125.29 (q,  $J$  = 5.3 Hz), 122.92 (q,  $J$  = 276.3 Hz), 69.27, 29.68, 20.15, 17.21. **HRMS (ESI)**:  $m/z$  calculated for  $\text{C}_{22}\text{H}_{22}\text{ClF}_3\text{N}_2\text{ONa}$   $[\text{M}+\text{Na}]^+$ : 445.1270, found: 445.1269.

(*E*)-*N'*-(6-hydroxy-2-methyl-4-(3,3,3-trifluoroprop-1-en-2-yl)hex-4-en-3-yl)benzohydrazide (**3gh**)

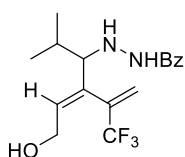

Following the general procedure B, **3gh** was purified by preparative thin layer chromatography using ethyl acetate/petroleum ether =1:2 as eluent and was obtained as white solid. Yield = 70%, (*E/Z* > 99:1, and reaction time was extended to 28 h),  $R_f$  = 0.28 (ethyl acetate/petroleum ether 1:2), mp 61–62 °C.  $^1\text{H NMR}$  (400 MHz,  $\text{CDCl}_3$ )  $\delta$  7.94 (s, 1H), 7.72 – 7.64 (m, 2H), 7.52 – 7.44 (m, 1H), 7.43 – 7.35 (m, 2H), 6.22 (dd,  $J$  = 7.2, 5.9 Hz, 1H), 5.95 (q,  $J$  = 1.4 Hz, 1H), 5.40 (q,  $J$  = 1.3 Hz, 1H), 4.24 – 4.11 (m, 2H), 3.42 (d,  $J$  = 5.6 Hz, 1H), 1.96 – 1.81 (m, 1H), 1.08 (d,  $J$  = 6.9 Hz, 3H), 1.00 (d,  $J$  = 6.9 Hz, 3H).  $^{19}\text{F NMR}$  (376 MHz,  $\text{CDCl}_3$ )  $\delta$  -64.61.  $^{13}\text{C NMR}$  (101 MHz,  $\text{CDCl}_3$ )  $\delta$  167.50, 136.44 (q,  $J$  = 30.8 Hz), 135.72, 133.42, 133.08, 131.84, 128.75, 127.00, 123.97 (q,  $J$  = 5.4 Hz), 122.84 (q,  $J$  = 276.0 Hz), 68.86, 59.92, 29.88, 20.13, 17.46. **HRMS (ESI)**:  $m/z$  calculated for  $\text{C}_{17}\text{H}_{21}\text{F}_3\text{N}_2\text{O}_2\text{Na}$   $[\text{M}+\text{Na}]^+$ : 365.1453, found: 365.1446.

(*E*)-5-(2-benzoylhydrazinyl)-6-methyl-4-(3,3,3-trifluoroprop-1-en-2-yl)hept-3-en-1-yl 4-methylbenzenesulfonate (**3gi**)

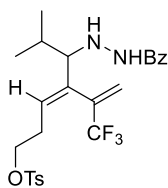

Following the general procedure B, **3gi** was obtained as white solid.

Yield = 94% (*E/Z* > 99:1, and reaction time was extended to 28 h),  $R_f$  = 0.43 (ethyl acetate/petroleum ether 1:2), mp 44–45 °C. **<sup>1</sup>H NMR** (400 MHz, CDCl<sub>3</sub>) δ 7.91 (s, 1H), 7.78 – 7.70 (m, 4H), 7.52 – 7.45 (m, 1H), 7.44 – 7.38 (m, 2H), 7.34 – 7.28 (m, 2H), 6.10 (dd, *J* = 8.4, 6.1 Hz, 1H), 5.95 (q, *J* = 1.4 Hz, 1H), 5.39 (q, *J* = 1.2 Hz, 1H), 4.19 – 4.03 (m, 2H), 3.46 (d, *J* = 5.1 Hz, 1H), 2.60 – 2.43 (m, 2H), 2.43 (s, 3H), 1.94 – 1.80 (m, 1H), 1.12 (d, *J* = 6.9 Hz, 3H), 0.99 (d, *J* = 6.9 Hz, 3H). **<sup>19</sup>F NMR** (376 MHz, CDCl<sub>3</sub>) δ -64.71. **<sup>13</sup>C NMR** (101 MHz, CDCl<sub>3</sub>) δ 167.28, 145.08, 136.94, 136.64 (q, *J* = 30.9 Hz), 133.04, 132.97, 131.73, 130.00, 129.06, 128.68, 127.87, 127.11, 124.02 (q, *J* = 5.2 Hz), 122.89 (q, *J* = 275.9 Hz), 69.65, 69.14, 29.54, 29.08, 21.73, 20.21, 16.99. **HRMS (ESI)**: *m/z* calculated for C<sub>25</sub>H<sub>29</sub>F<sub>3</sub>N<sub>2</sub>O<sub>4</sub>SNa [M+Na]<sup>+</sup>: 533.1698, found: 533.1697.

(*Z*)-*N*-(3-benzylidene-2-isopropyl-4-(trifluoromethyl)pyrrolidin-1-yl)benzamide (**6**)

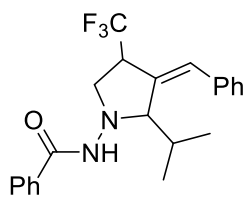

The *syn*-configured product **6** was obtained as pale yellow solid in 82% yield (93:7 dr ratio was determined by <sup>1</sup>H NMR analysis of the crude reaction mixture),  $R_f$  = 0.35 (isopropylamine/petroleum ether 1:20), mp 116–117 °C.

**<sup>1</sup>H NMR** (400 MHz, CDCl<sub>3</sub>) δ 7.71 (d, *J* = 7.6 Hz, 2H), 7.61 (s, 1H), 7.52 (t, *J* = 7.5 Hz, 1H), 7.43 (t, *J* = 7.5 Hz, 2H), 7.35 – 7.30 (m, 2H), 7.28 – 7.19 (m, 3H), 6.80 (s, 1H), 4.57 (s, 1H), 3.84 – 3.68 (m, 2H), 3.56 – 3.47 (m, 1H), 1.90 – 1.78 (m, 1H), 0.87 (d, *J* = 6.5 Hz, 3H), 0.83 (d, *J* = 6.5 Hz, 3H). **<sup>19</sup>F NMR** (376 MHz, CDCl<sub>3</sub>) δ -67.95 (d, *J* = 8.8 Hz). **<sup>13</sup>C NMR** (101 MHz, CDCl<sub>3</sub>) δ 166.42, 136.92, 133.62, 132.00, 129.14, 128.88, 128.48, 128.39, 127.37, 126.97, 126.45 (q, *J* = 279.8 Hz), 71.95, 53.24, δ 48.09 (q, *J* = 28.0 Hz), 30.15, 21.06, 17.68. **HRMS (ESI)**: *m/z* calculated for C<sub>22</sub>H<sub>23</sub>F<sub>3</sub>N<sub>2</sub>ONa [M+Na]<sup>+</sup>: 411.1660, found: 411.1659.

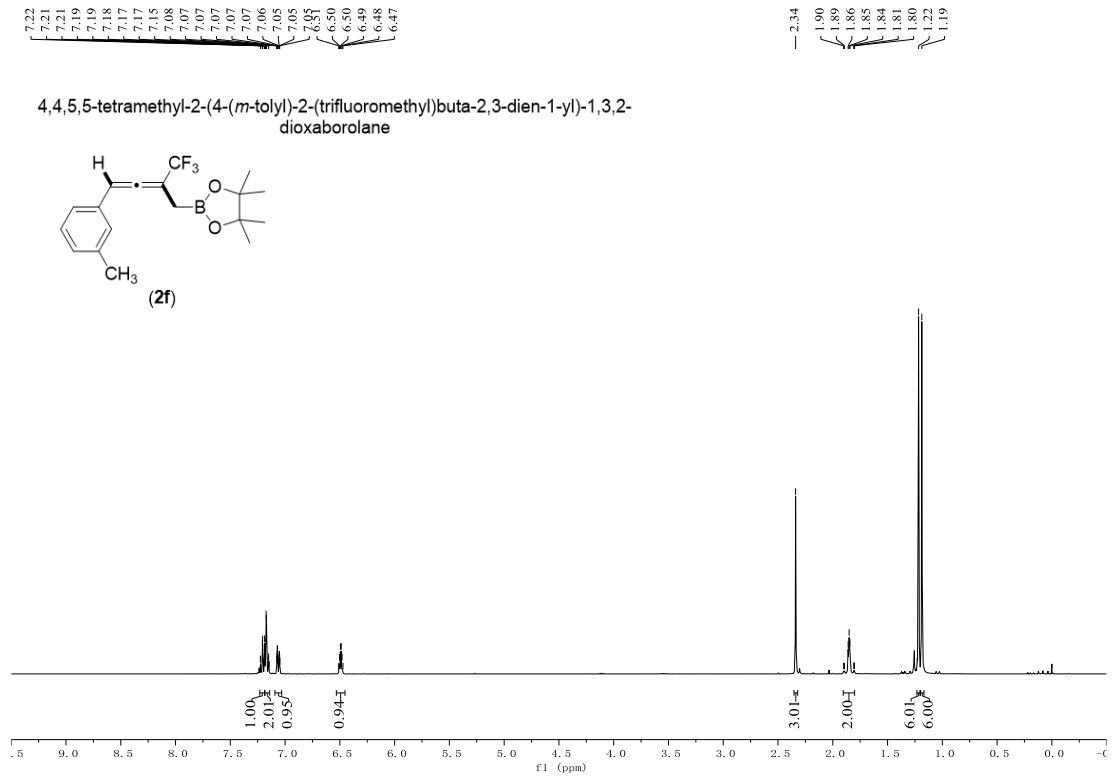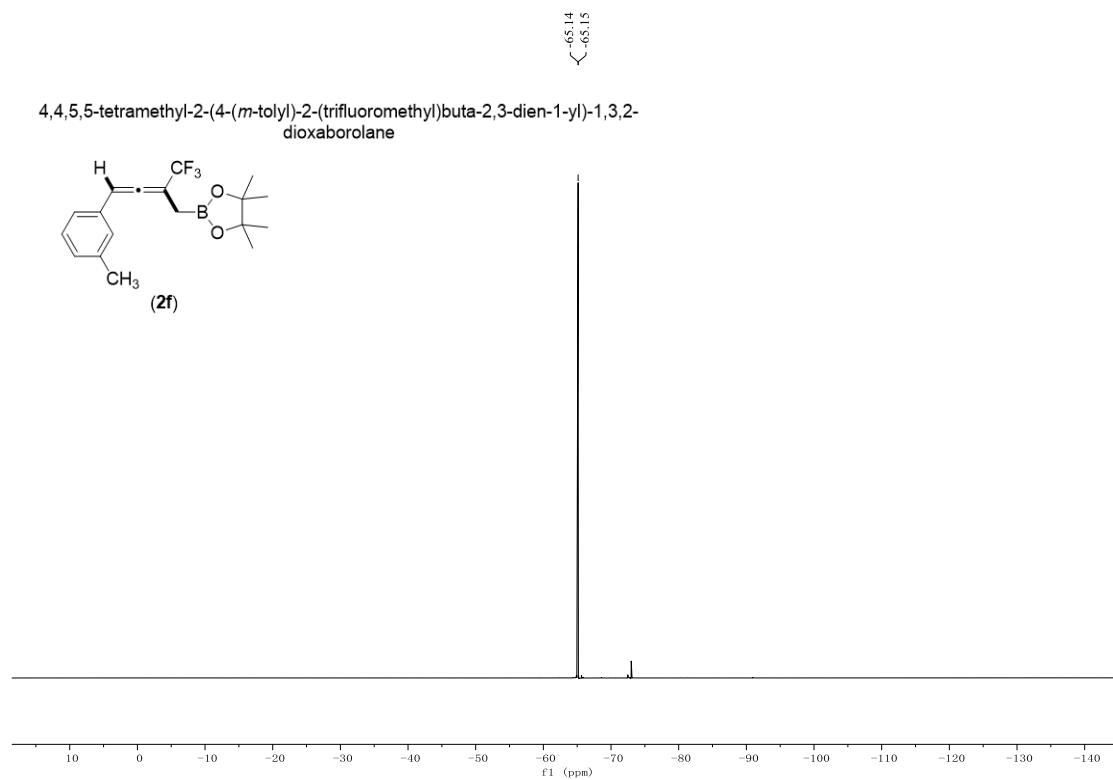



32.64

4,4,5,5-tetramethyl-2-(4-(*m*-tolyl)-2-(trifluoromethyl)buta-2,3-dien-1-yl)-1,3,2-dioxaborolane

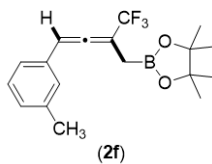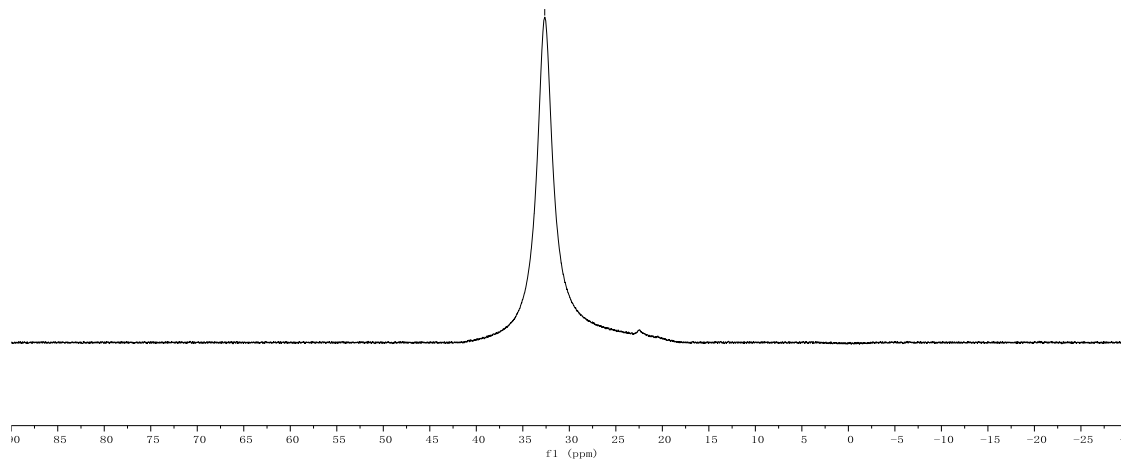

204.53  
204.30  
204.45  
204.41

138.40  
132.28  
132.26  
128.98  
128.65  
128.34  
127.85  
125.13  
122.41  
119.68

100.66  
99.43  
99.08  
98.74  
98.39  
84.04  
77.48  
77.16  
76.84

24.93  
24.78  
21.46

4,4,5,5-tetramethyl-2-(4-(*m*-tolyl)-2-(trifluoromethyl)buta-2,3-dien-1-yl)-1,3,2-dioxaborolane

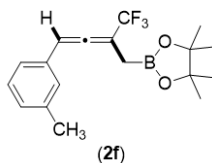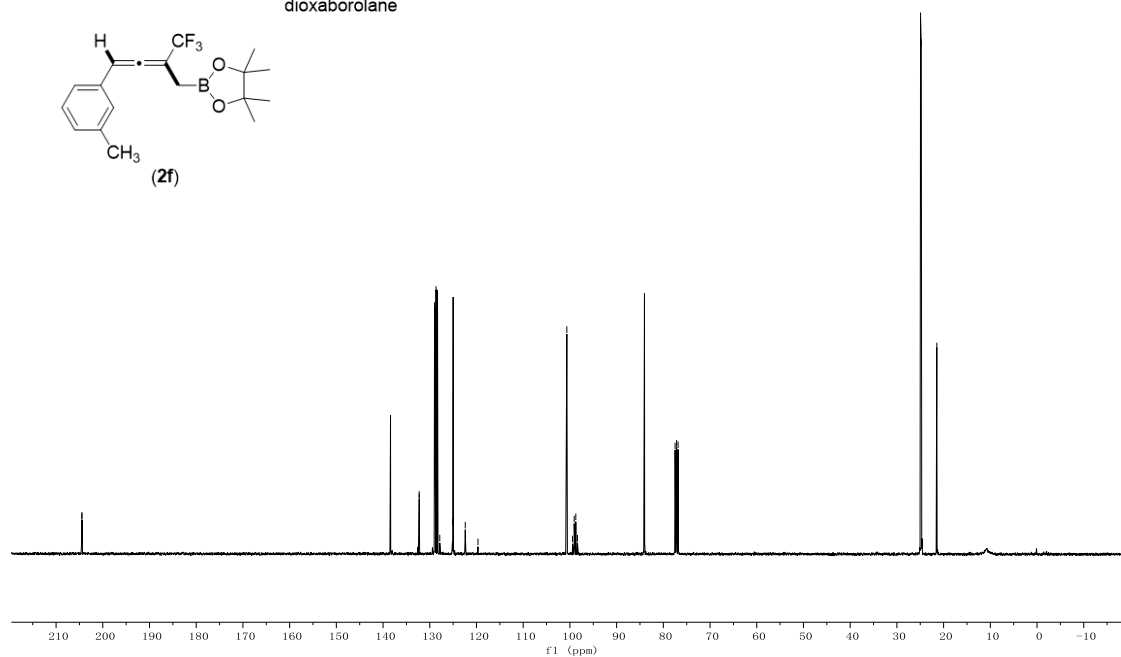

7.66  
7.66  
7.66  
7.65  
7.64  
7.62  
7.61  
7.51  
7.51  
7.50  
7.49  
7.48  
7.48  
7.47  
7.47  
7.46  
7.46  
7.45  
7.42  
7.41  
7.41  
7.39  
7.38  
7.38  
7.37  
7.36  
7.36  
7.35  
7.35  
7.34  
7.34  
7.33  
7.33  
7.32  
7.32  
7.31  
7.31  
7.30  
7.29  
7.29  
7.28  
7.28  
7.26  
7.26  
7.25  
7.25  
7.24  
7.24  
7.22  
7.22  
5.76  
5.75  
5.75  
5.26  
5.25  
5.24  
4.97  
4.96  
4.96  
0.00

(E)-N-(2-benzylidene-1-phenyl-3-(trifluoromethyl)but-3-en-1-yl)benzohydrazide

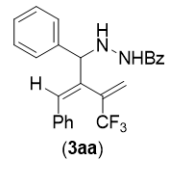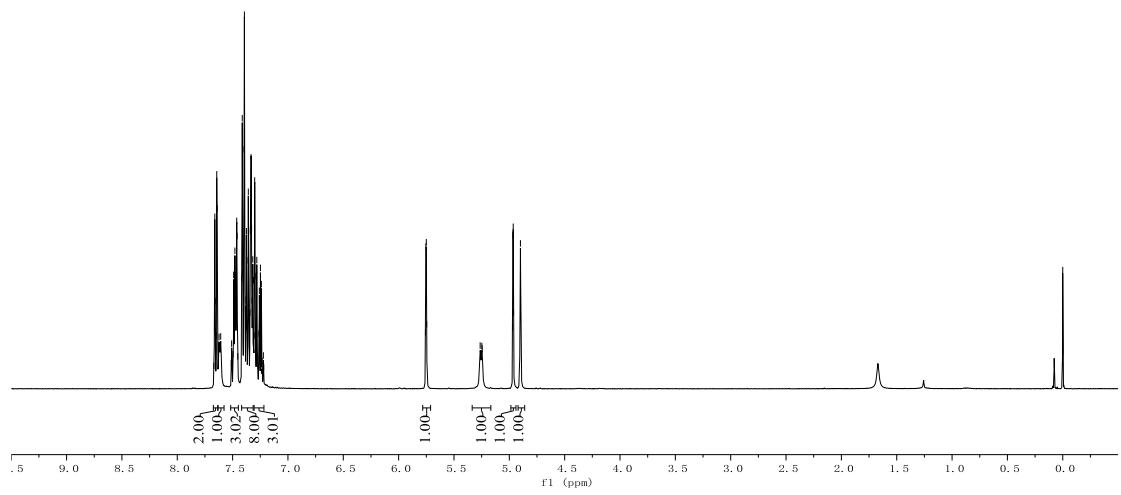

(E)-N-(2-benzylidene-1-phenyl-3-(trifluoromethyl)but-3-en-1-yl)benzohydrazide

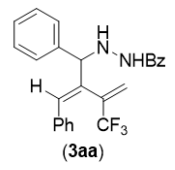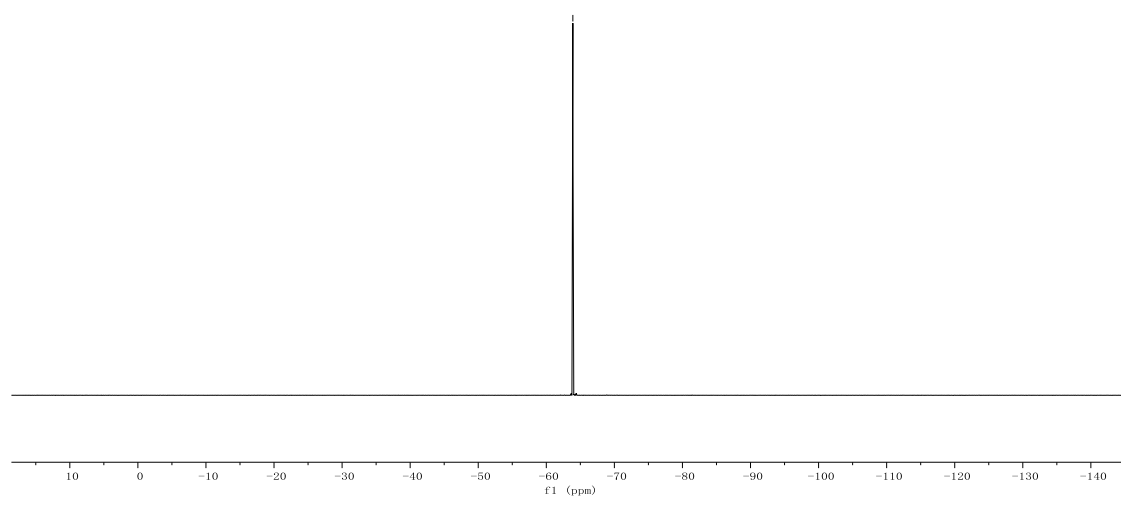

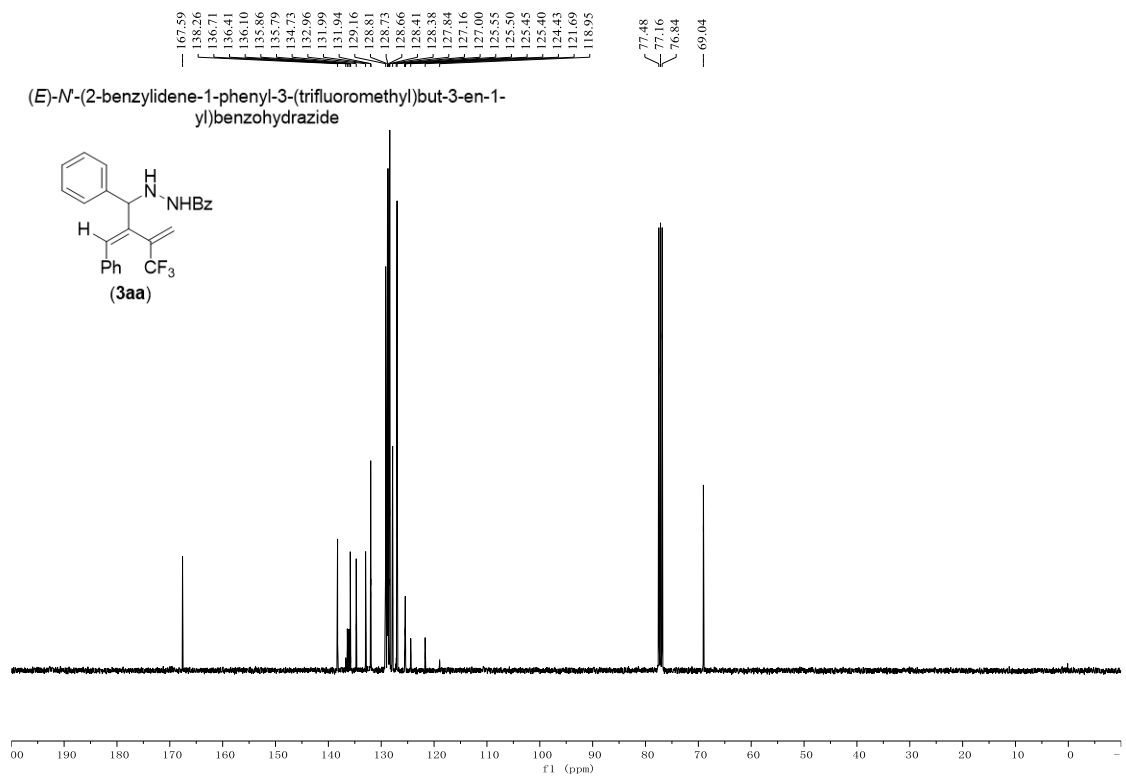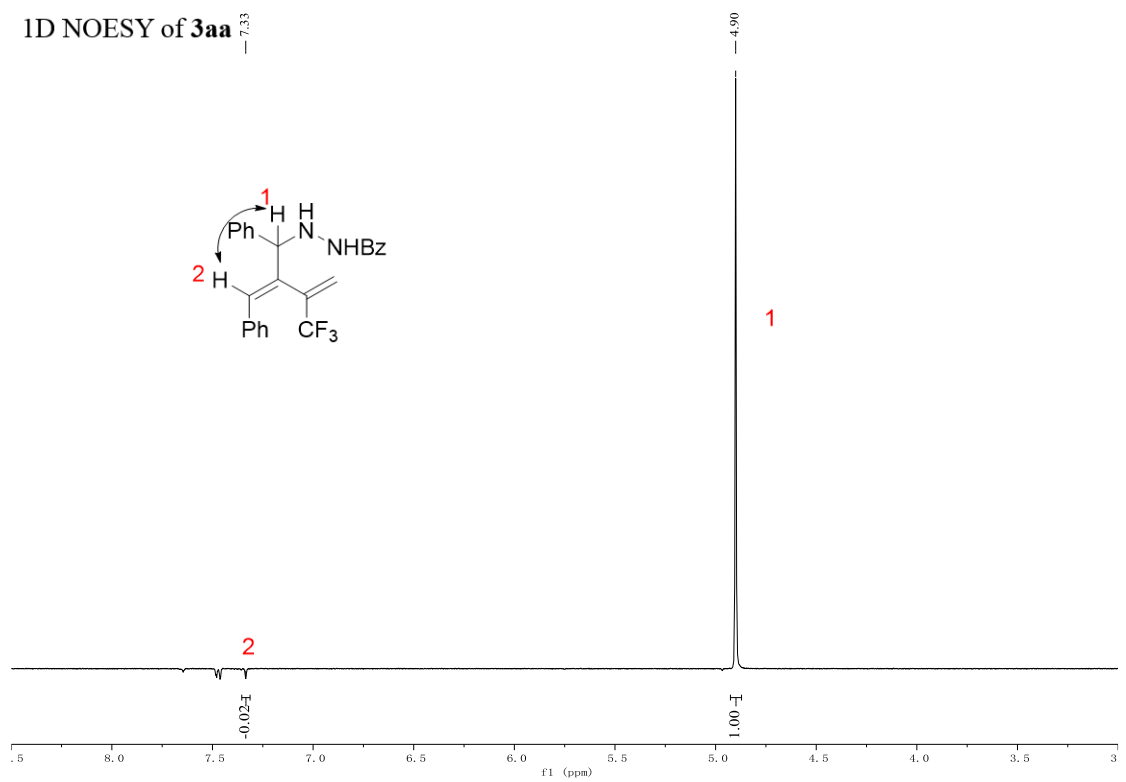

7.67  
7.67  
7.66  
7.66  
7.65  
7.65  
7.64  
7.61  
7.60  
7.51  
7.51  
7.50  
7.49  
7.48  
7.48  
7.47  
7.47  
7.47  
7.42  
7.41  
7.41  
7.40  
7.39  
7.38  
7.37  
7.37  
7.37  
7.36  
7.36  
7.35  
7.34  
7.34  
7.32  
7.32  
7.30  
7.30  
7.29  
7.28  
7.28  
7.27  
7.27  
7.26  
7.25  
7.25  
7.25  
7.24  
7.24  
7.23  
7.22  
7.22  
7.21  
7.21  
7.17  
7.15  
5.75  
5.75  
5.74  
5.74  
5.24  
5.22  
4.99  
4.98  
4.98  
4.85  
4.85  
2.34  
-0.00

(E)-N-(2-benzylidene-1-(p-tolyl)-3-(trifluoromethyl)but-3-en-1-yl)benzohydrazide

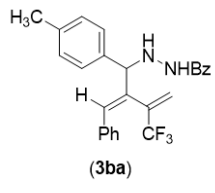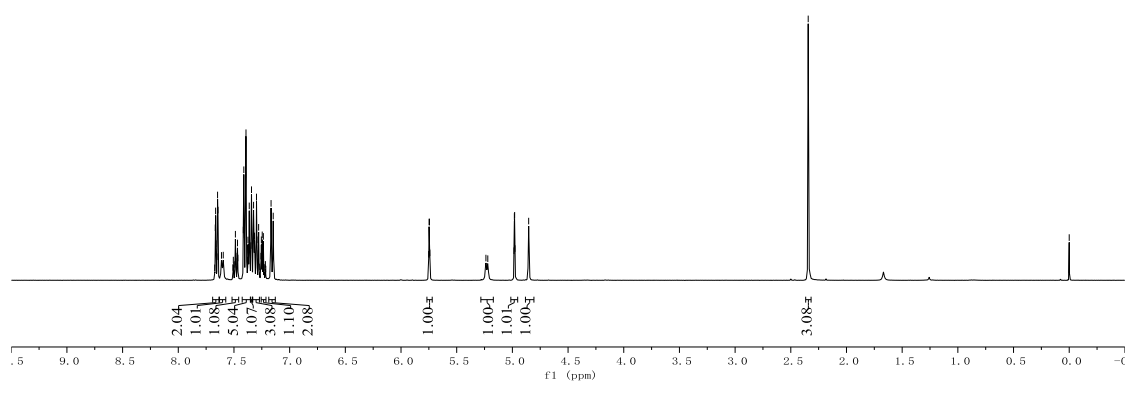

-63.92

(E)-N-(2-benzylidene-1-(p-tolyl)-3-(trifluoromethyl)but-3-en-1-yl)benzohydrazide

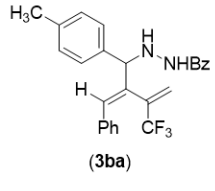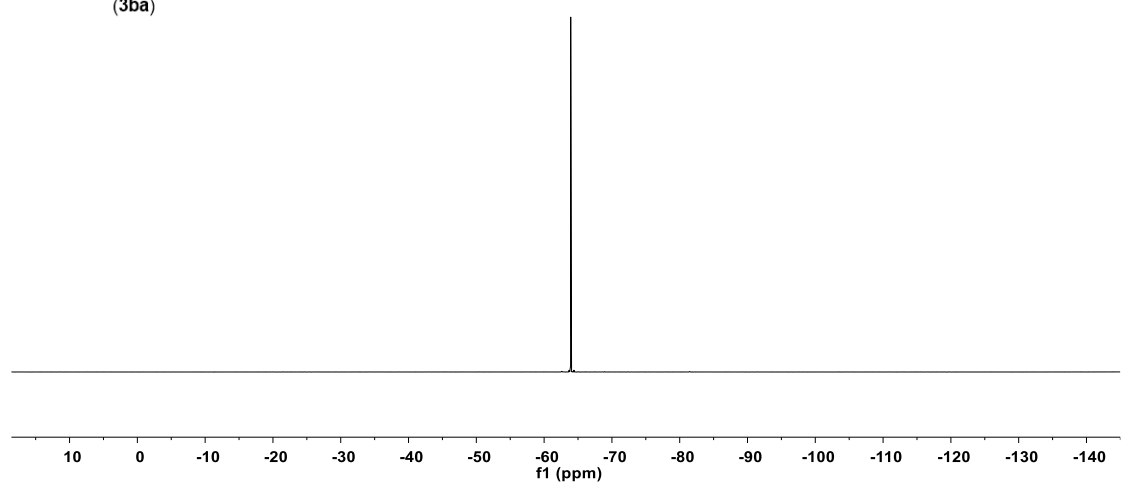

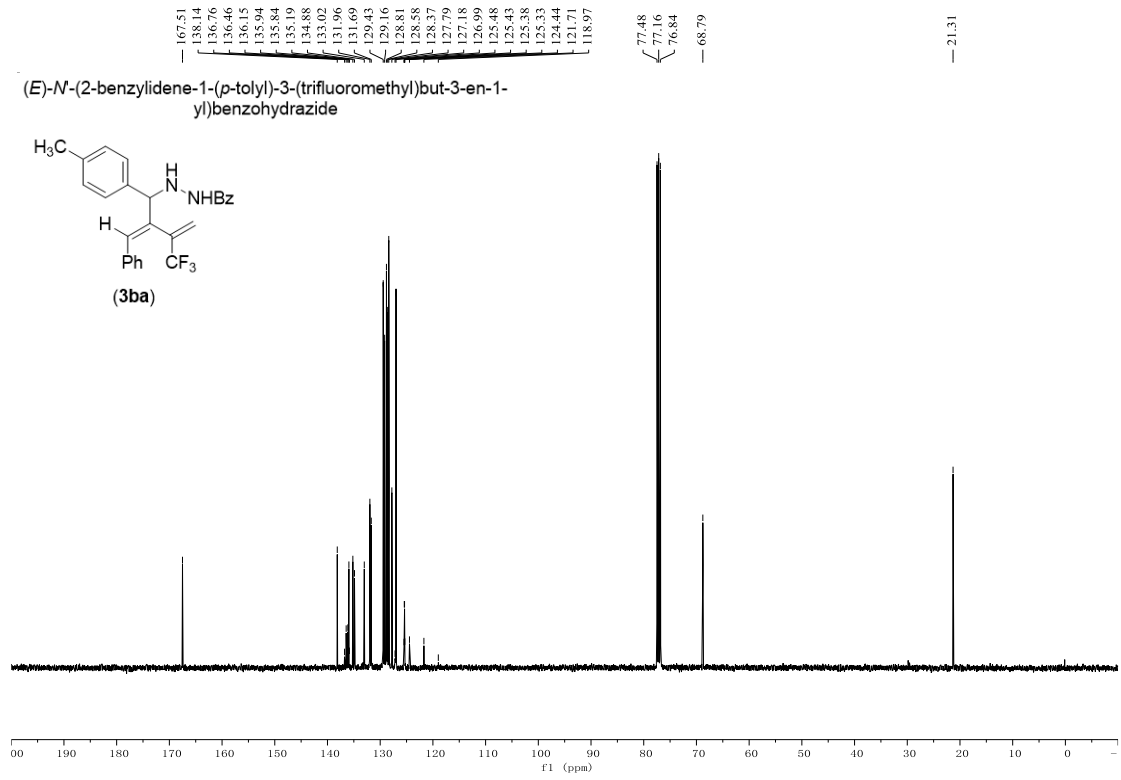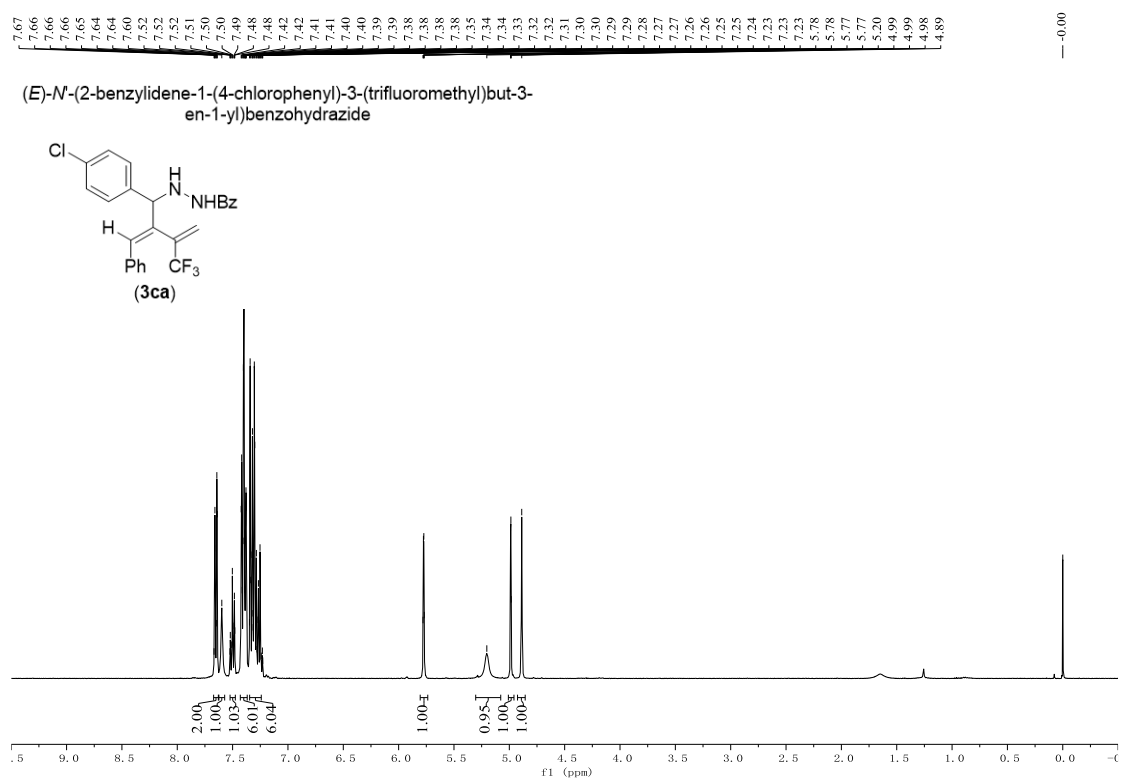

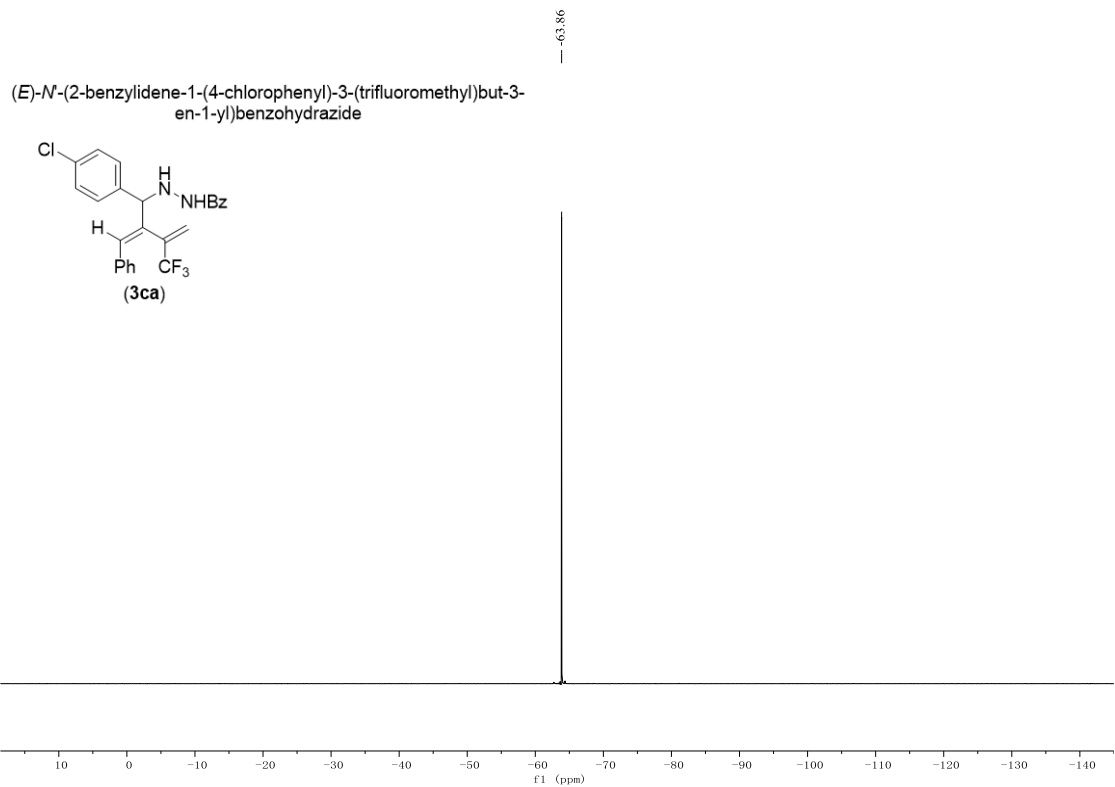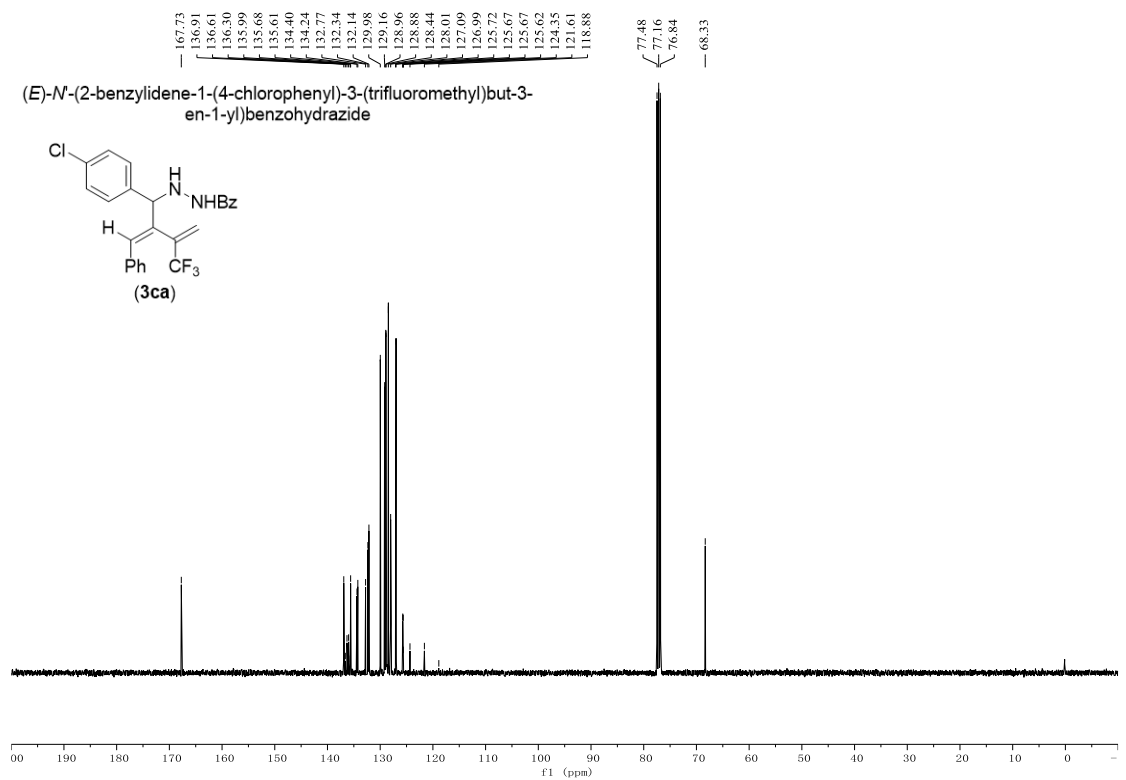

7.67  
7.66  
7.66  
7.65  
7.64  
7.64  
7.64  
7.63  
7.62  
7.62  
7.61  
7.58  
7.53  
7.52  
7.52  
7.51  
7.51  
7.50  
7.49  
7.49  
7.48  
7.42  
7.42  
7.41  
7.40  
7.40  
7.39  
7.39  
7.38  
7.38  
7.37  
7.33  
7.32  
7.32  
7.31  
7.31  
7.31  
7.30  
7.29  
7.29  
7.28  
7.28  
7.27  
7.27  
7.26  
7.25  
7.25  
7.25  
7.24  
7.24  
7.23  
7.23  
7.20  
7.20  
5.78  
5.78  
5.24  
5.24  
5.23  
5.23  
4.99  
4.99  
4.98  
4.98

(E)-N-(2-benzylidene-3-(trifluoromethyl)-1-(4-(trifluoromethyl)phenyl)but-3-en-1-yl)benzohydrazide

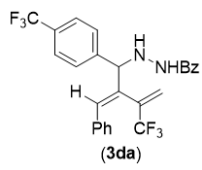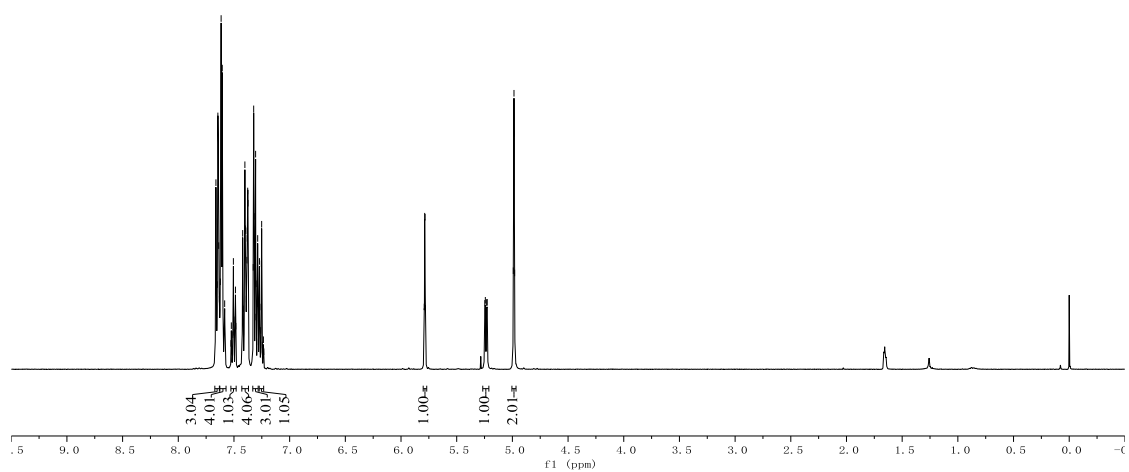

62.53  
63.81

(E)-N-(2-benzylidene-3-(trifluoromethyl)-1-(4-(trifluoromethyl)phenyl)but-3-en-1-yl)benzohydrazide

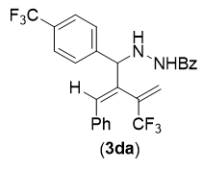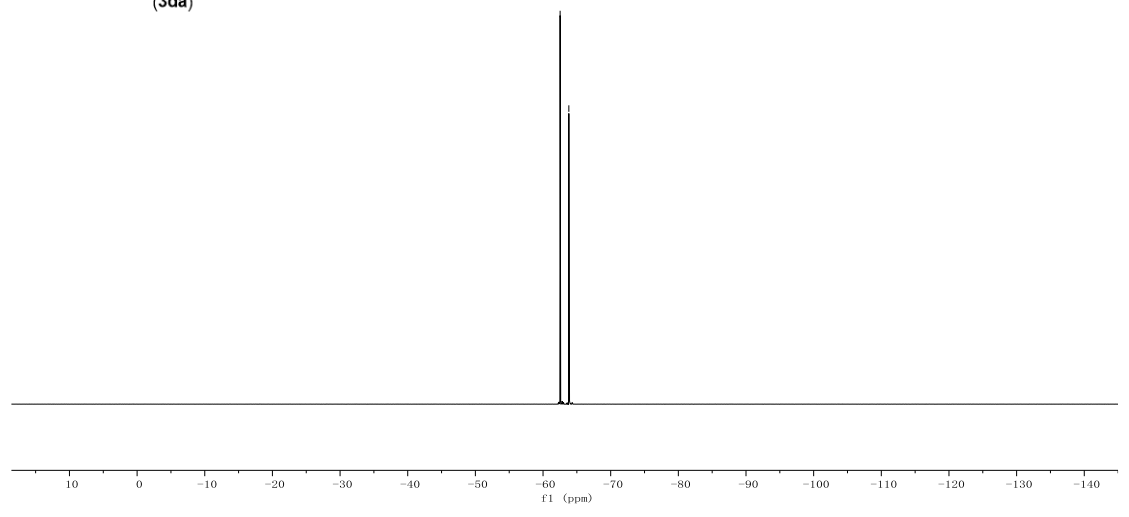

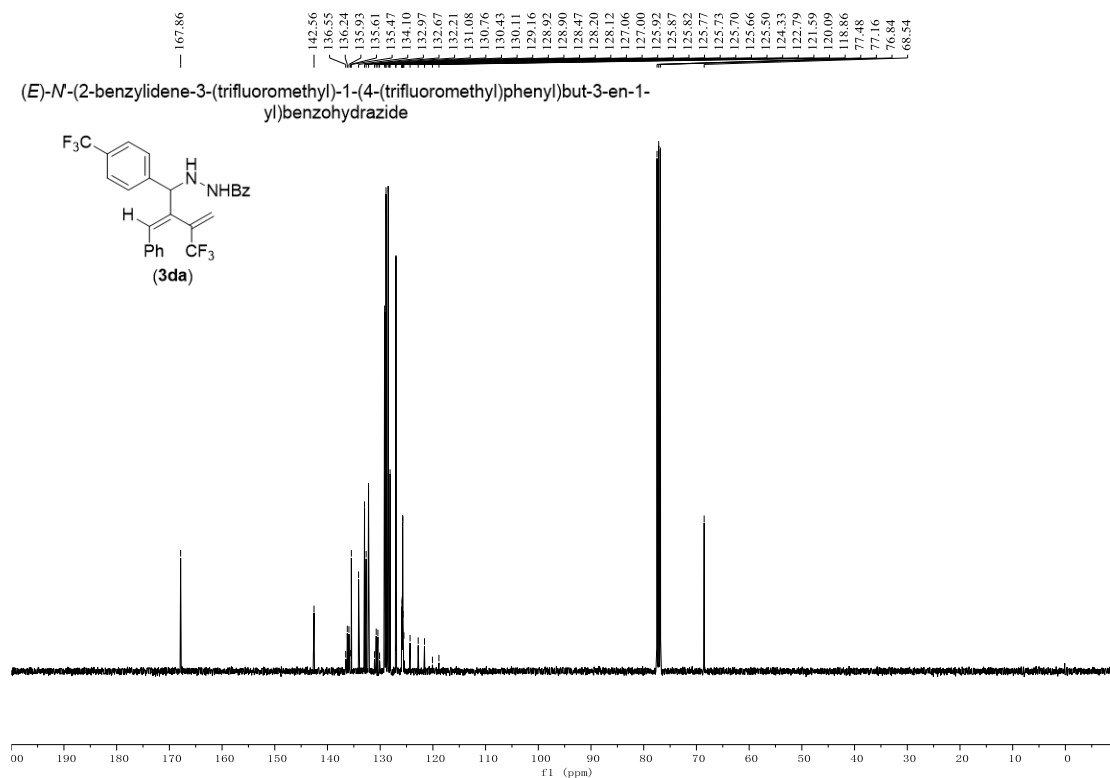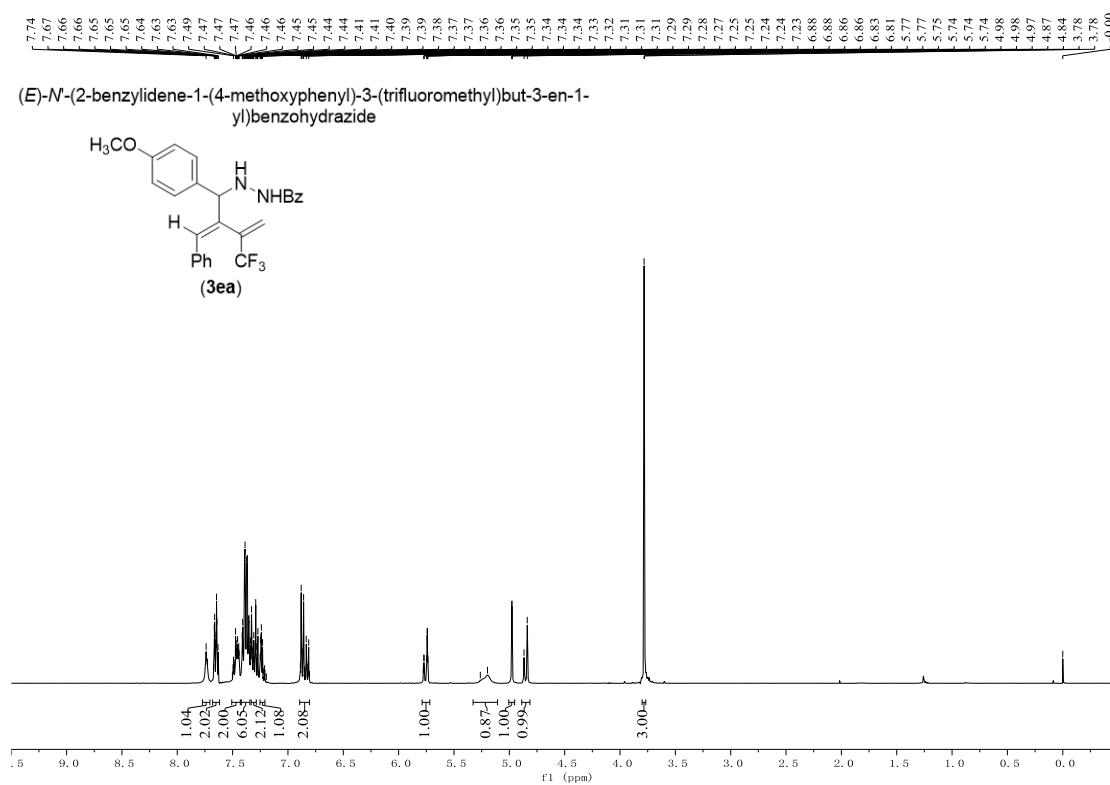



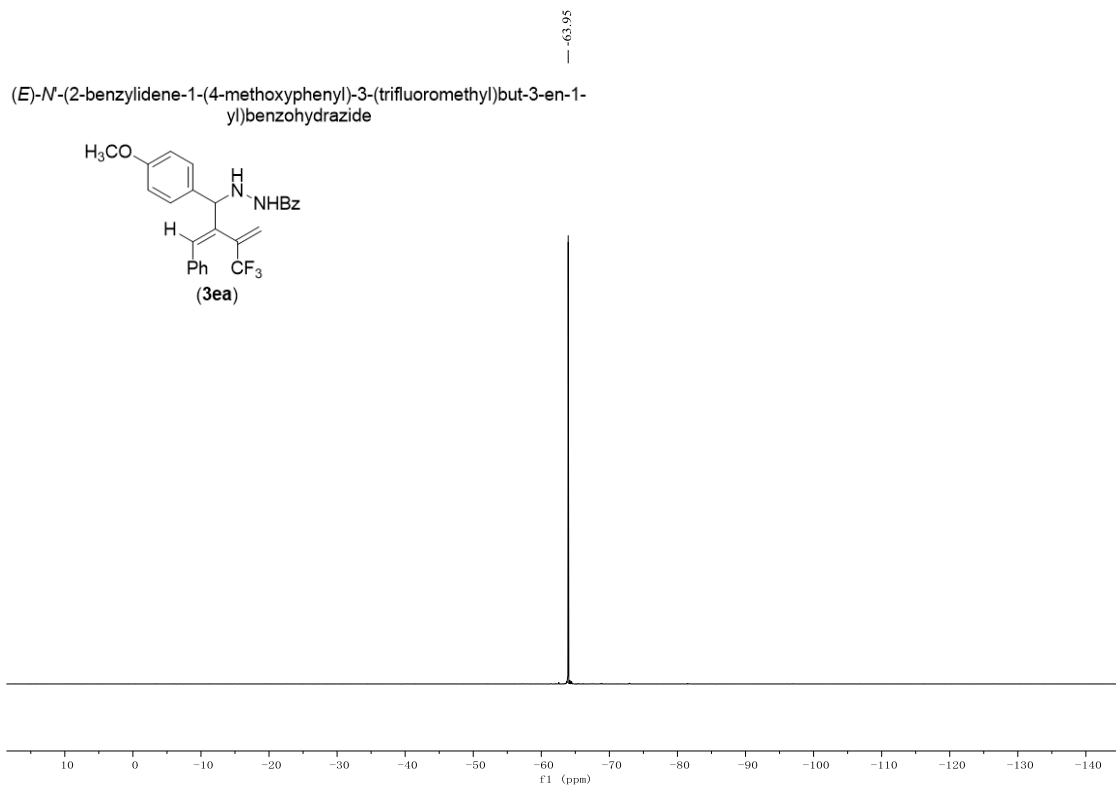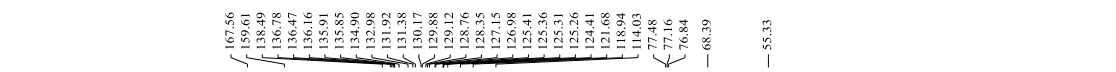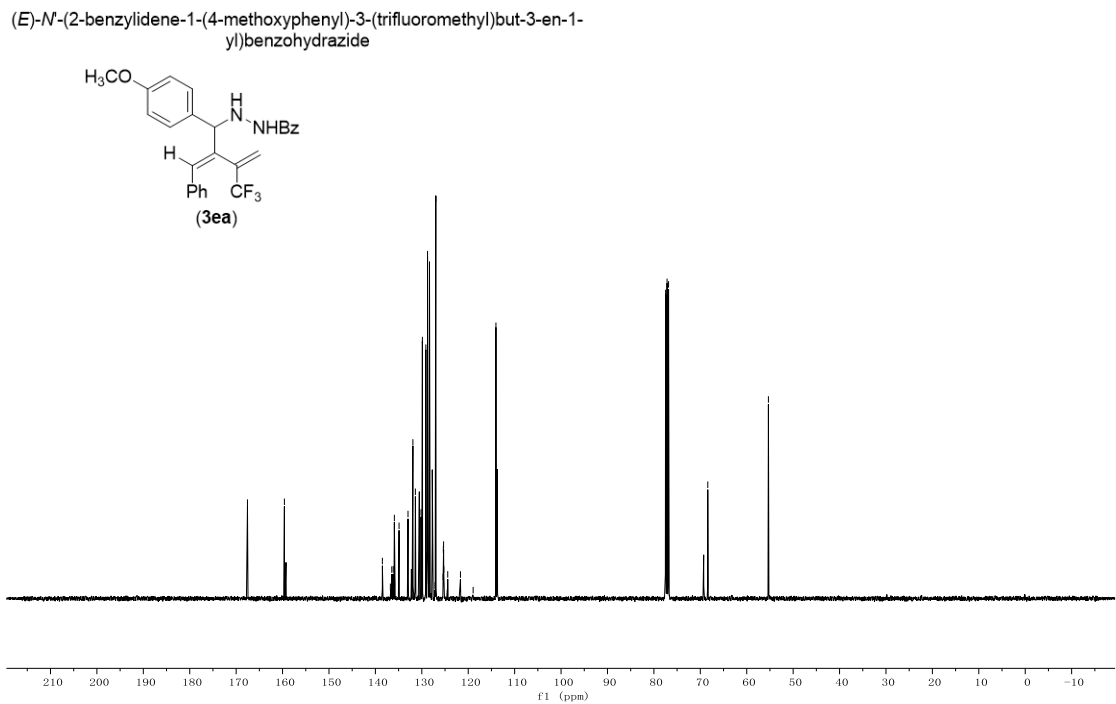

1D NOESY of **3ea**

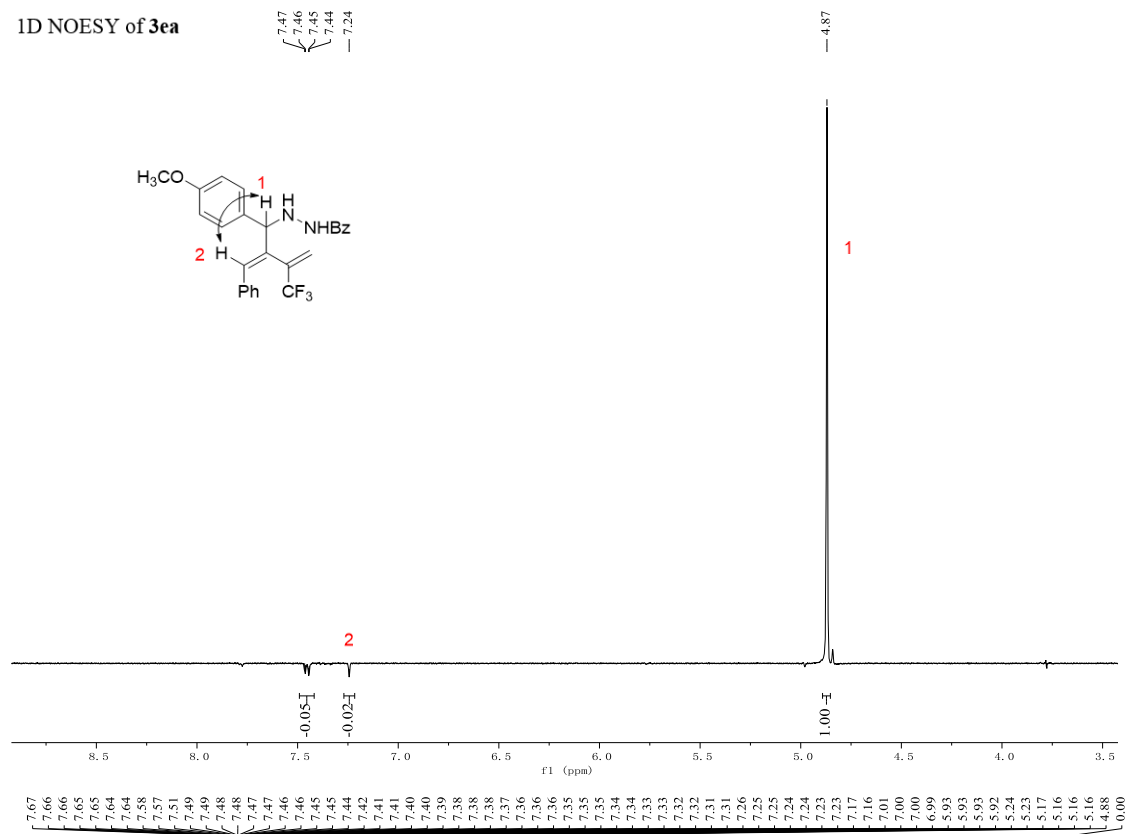

(*E*)-*N'*-(2-benzylidene-1-(thiophen-2-yl)-3-(trifluoromethyl)but-3-en-1-yl)benzohydrazide

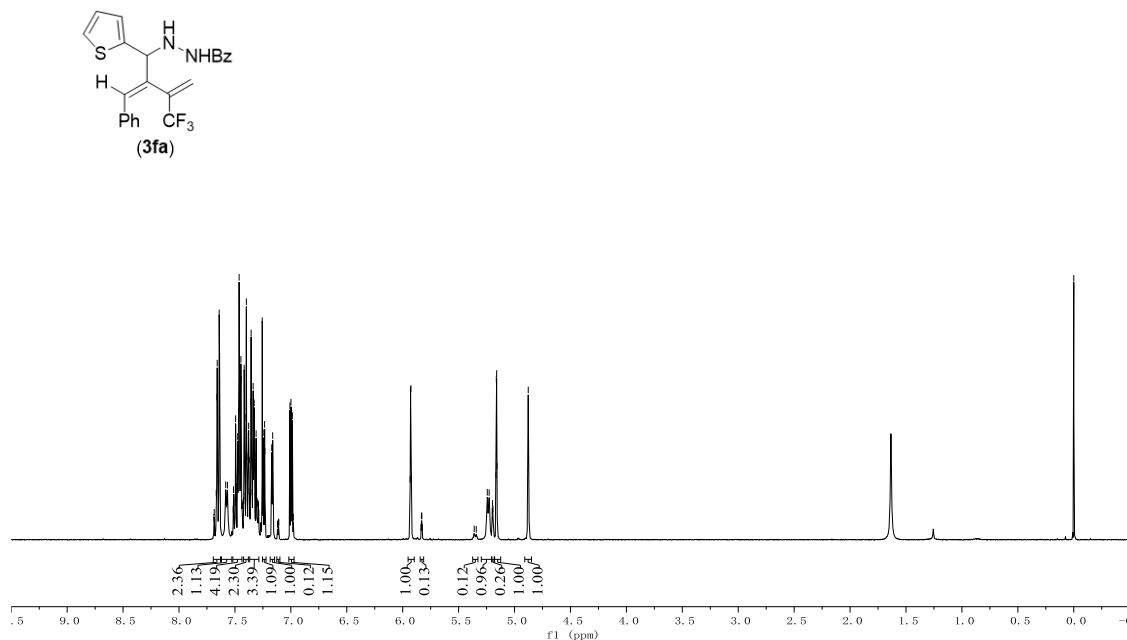

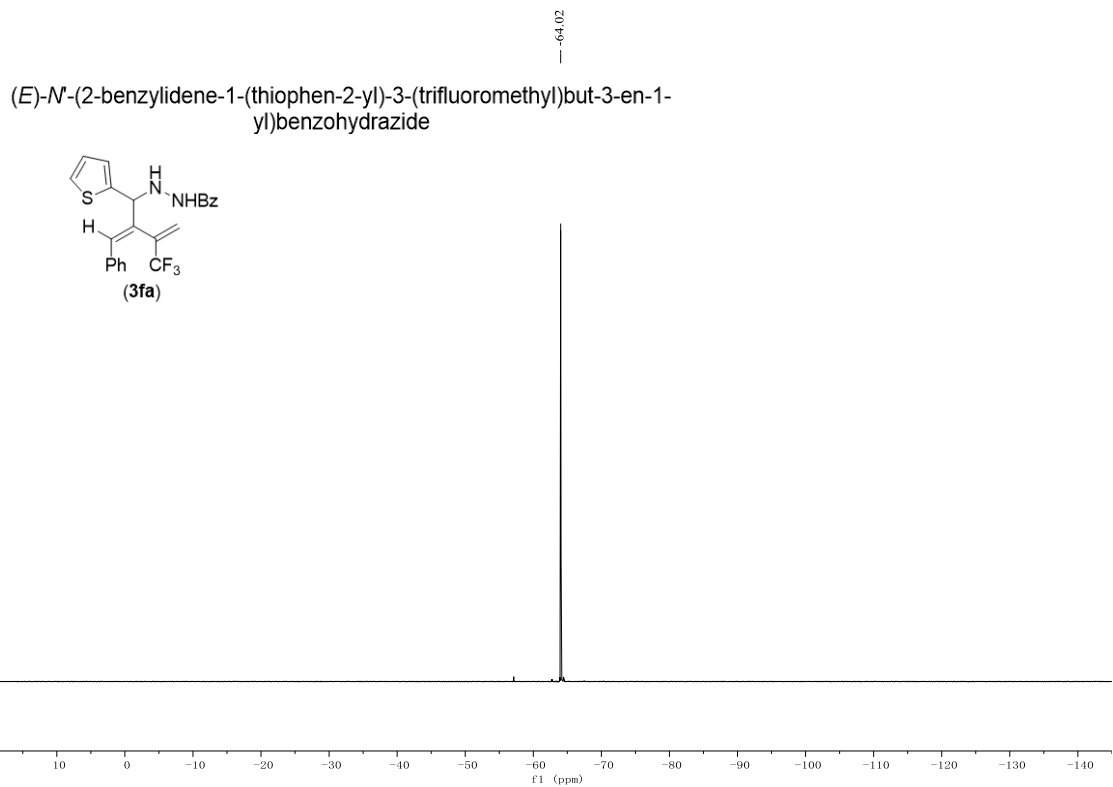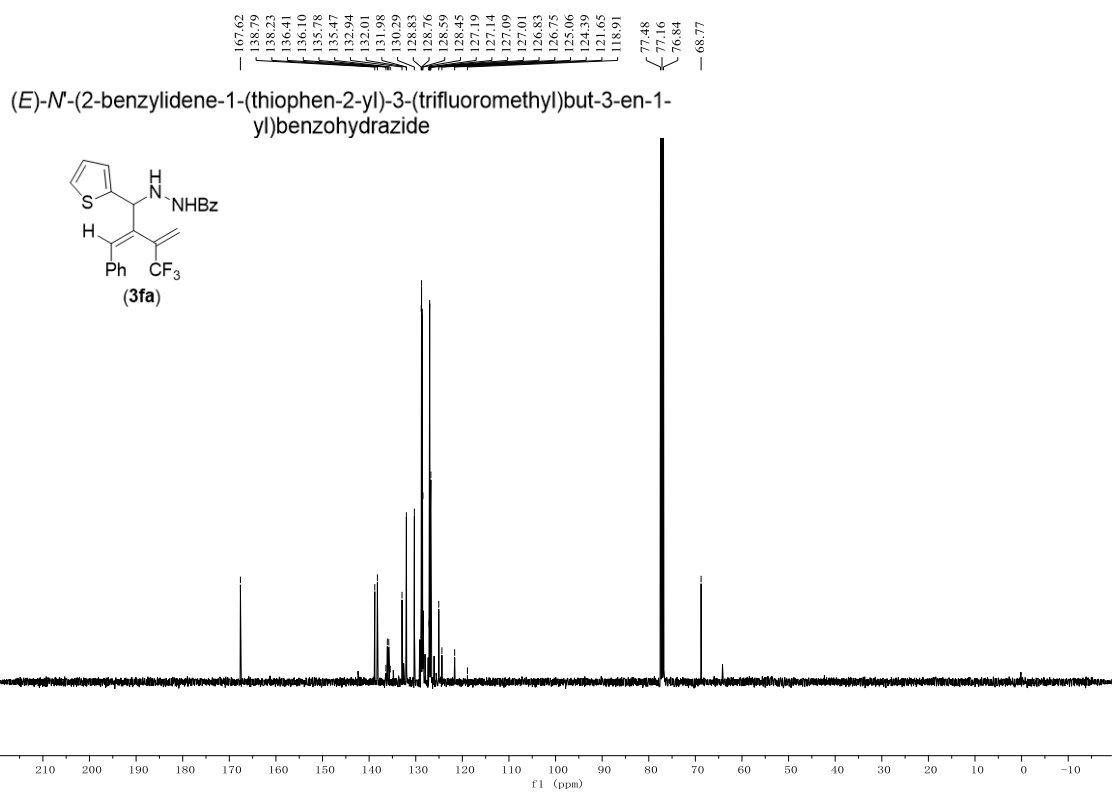

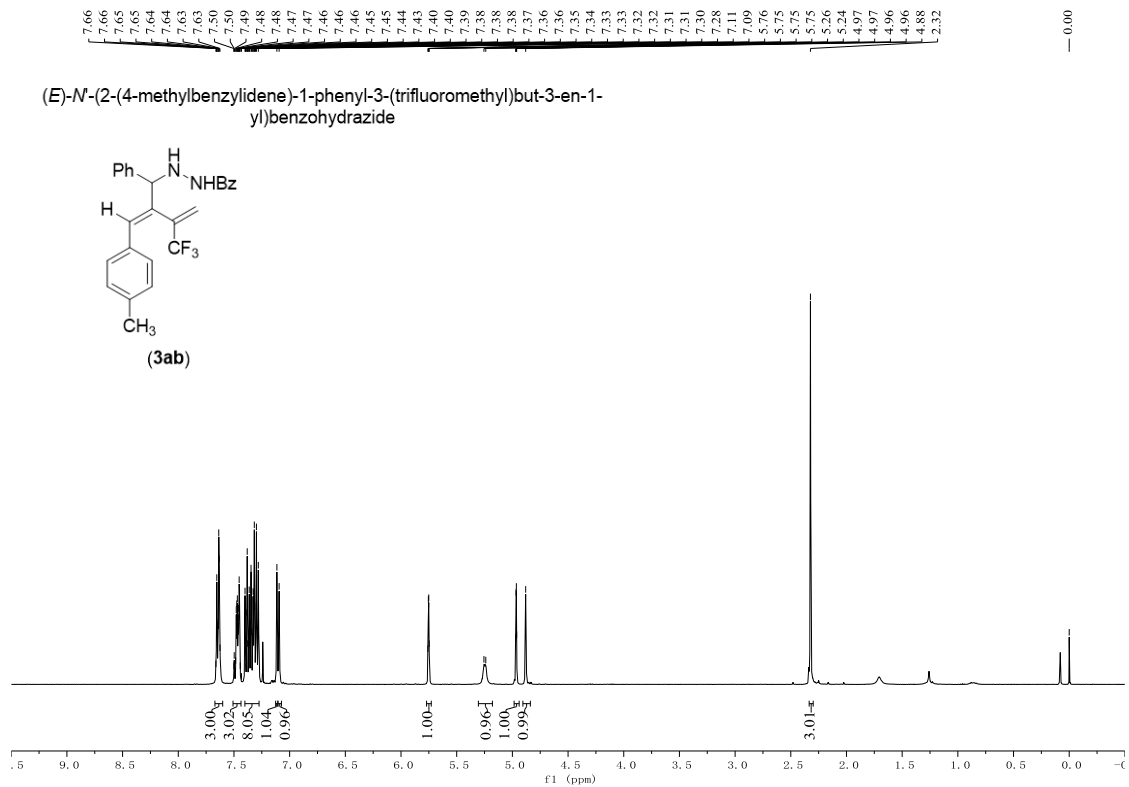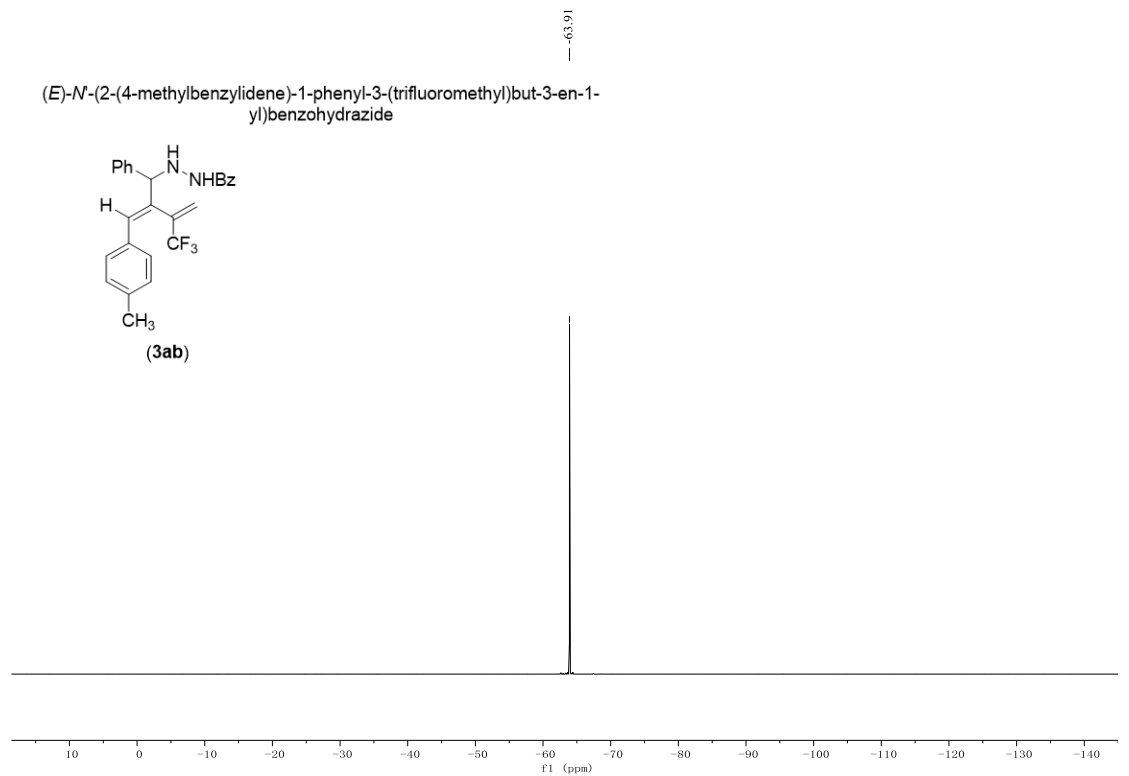

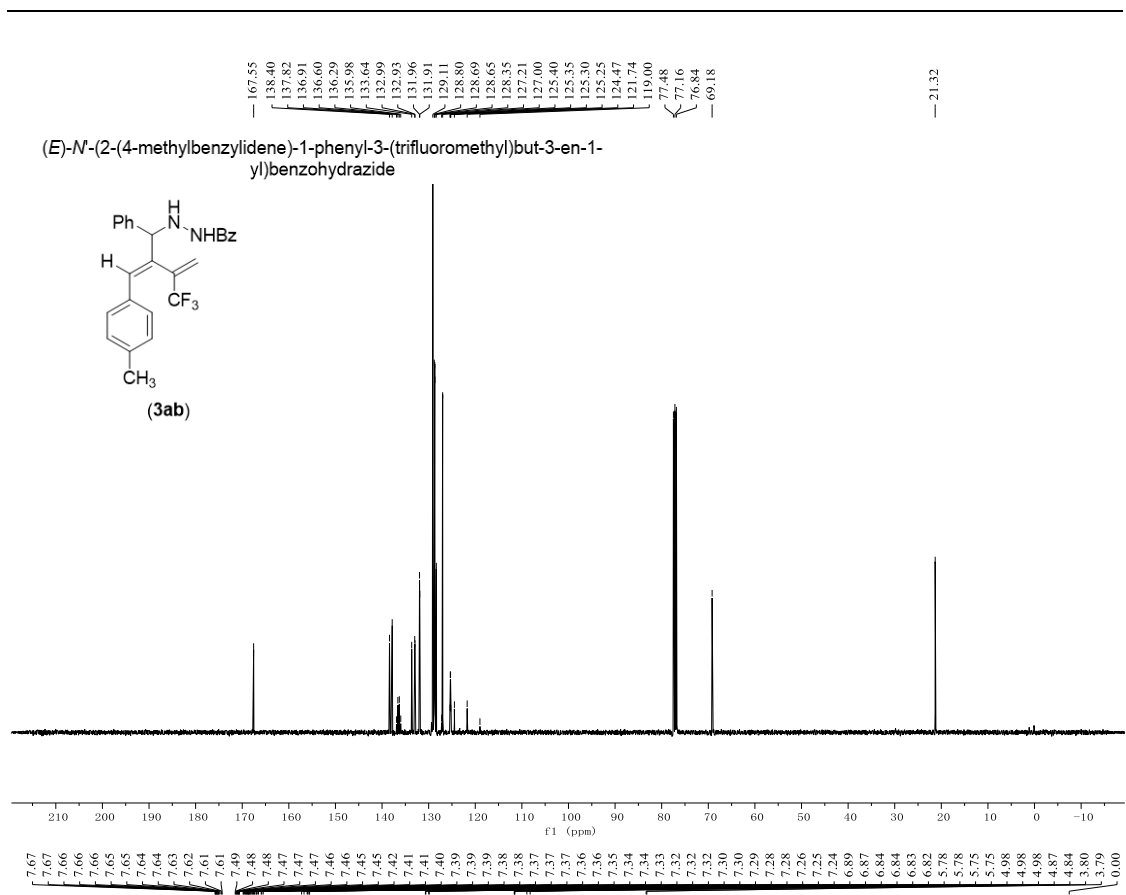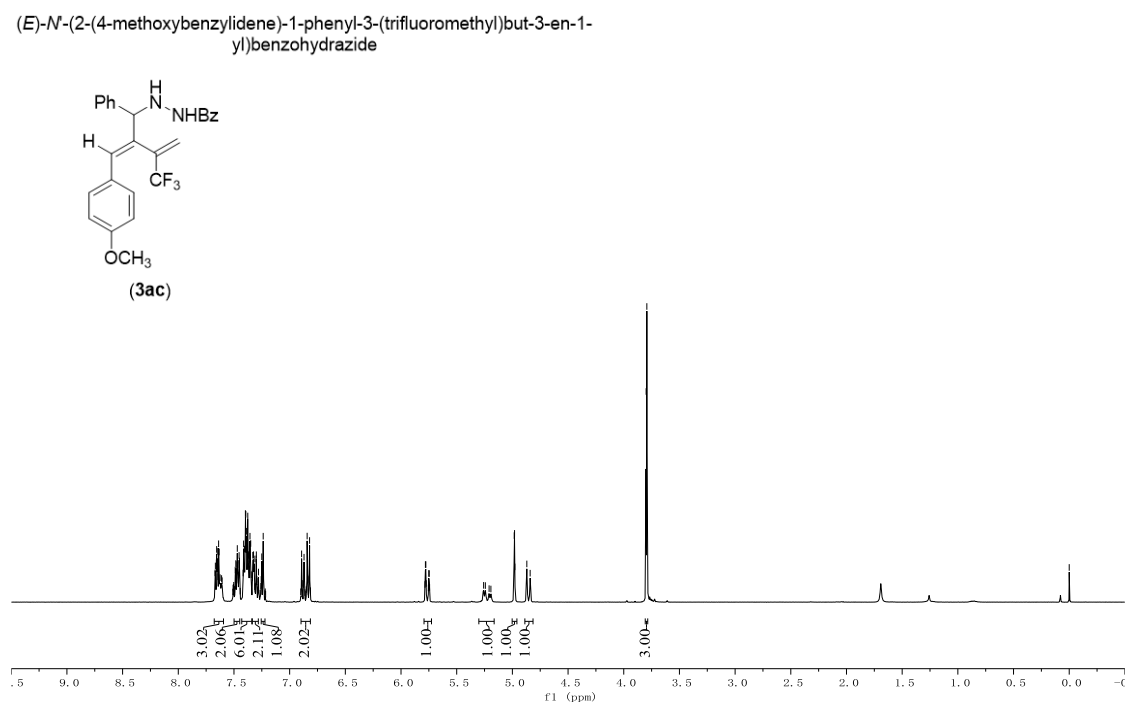

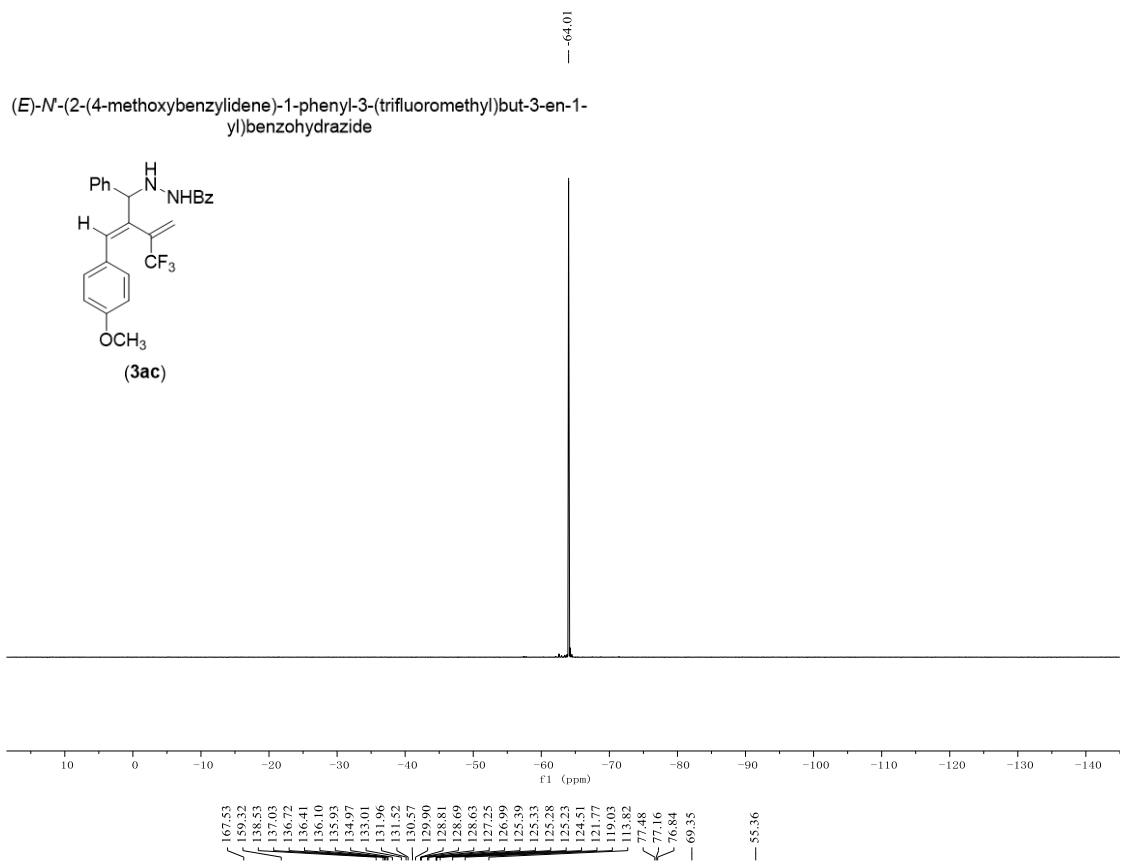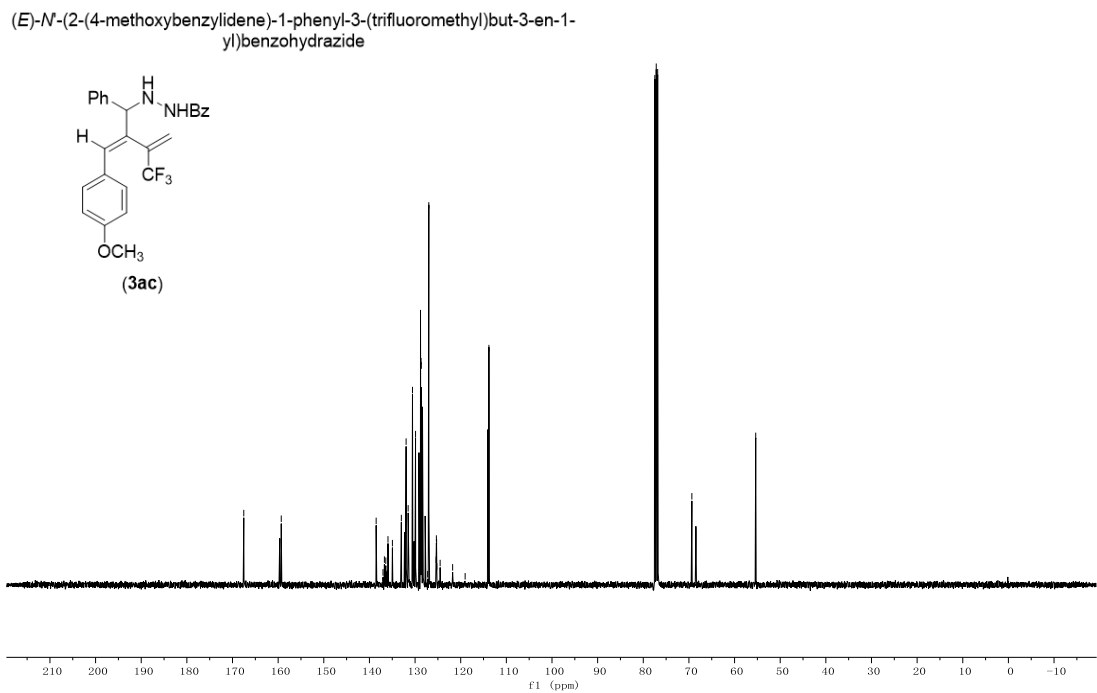

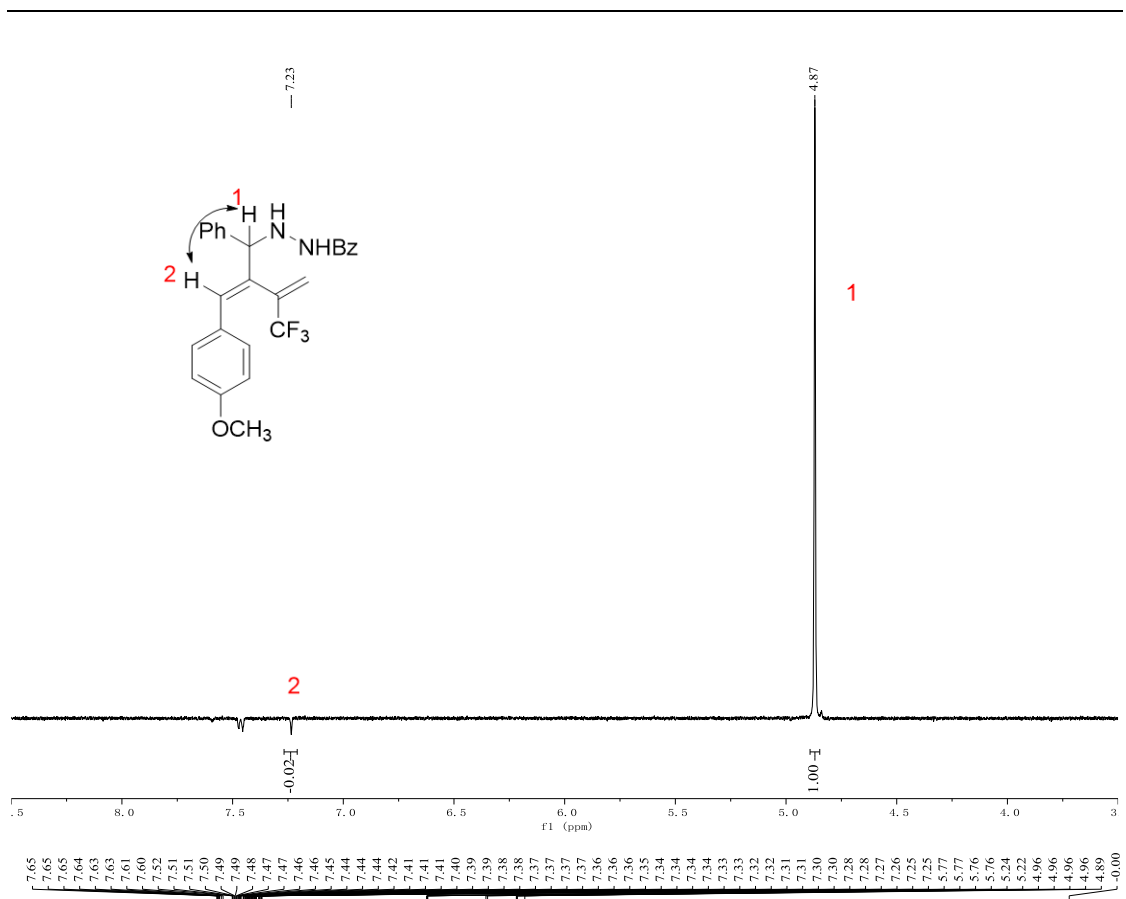

*(E)*-*N*-(2-(4-chlorobenzylidene)-1-phenyl-3-(trifluoromethyl)but-3-en-1-yl)benzohydrazide

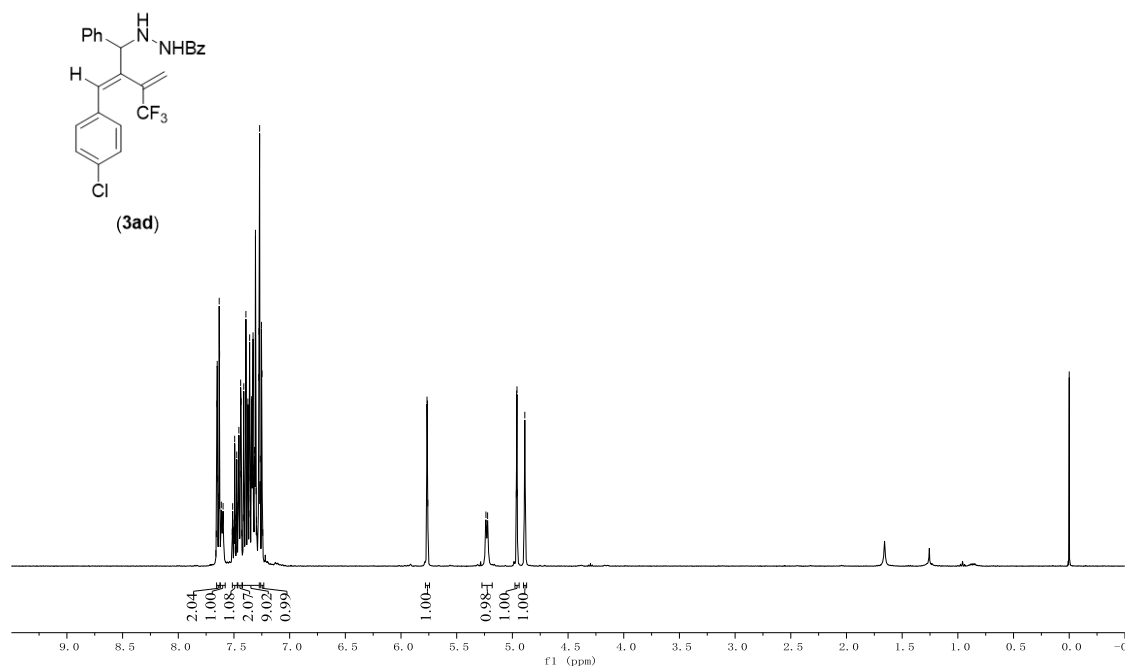

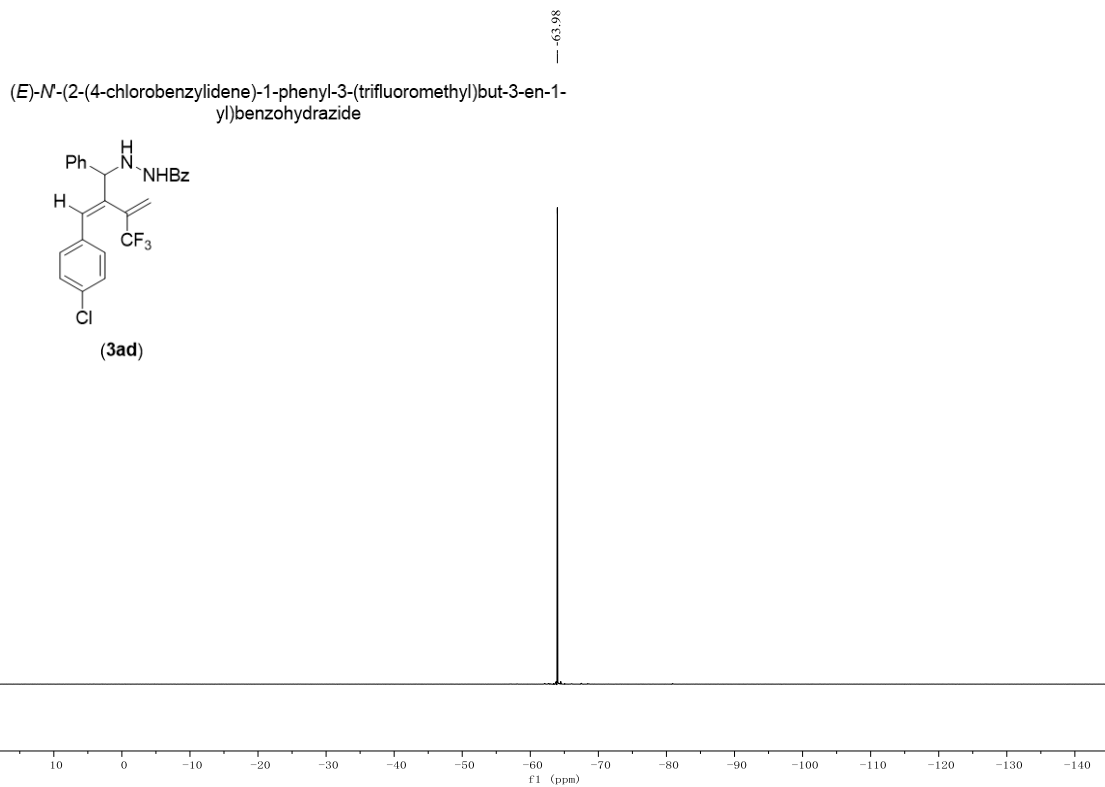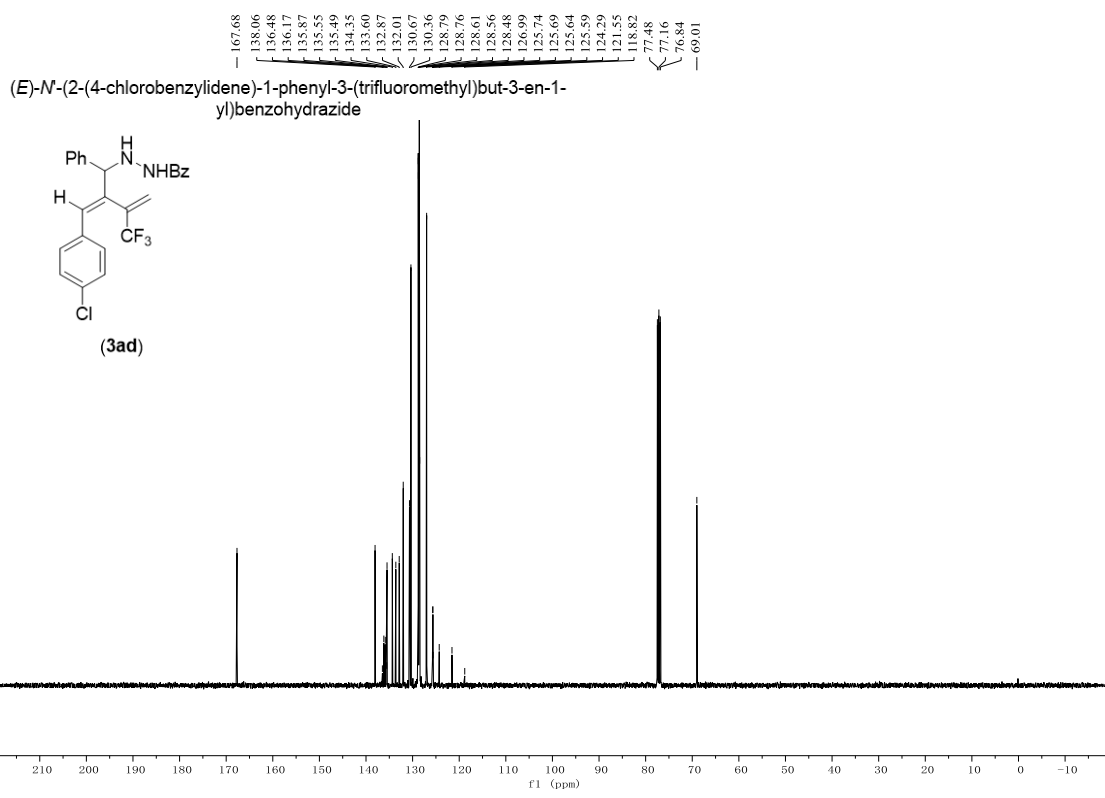



7.66  
7.65  
7.64  
7.63  
7.60  
7.58  
7.51  
7.49  
7.48  
7.47  
7.46  
7.45  
7.44  
7.42  
7.41  
7.40  
7.39  
7.38  
7.38  
7.37  
7.36  
7.36  
7.36  
7.36  
7.35  
7.35  
7.34  
7.34  
7.33  
7.33  
7.32  
7.32  
7.28  
7.25  
7.00  
7.00  
6.99  
6.98  
6.97  
6.96  
5.78  
5.77  
5.77  
5.25  
5.25  
5.24  
5.23  
4.97  
4.97  
4.89  
-0.00

(E)-N-(2-(4-fluorobenzylidene)-1-phenyl-3-(trifluoromethyl)but-3-en-1-yl)benzohydrazide

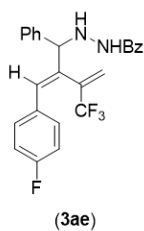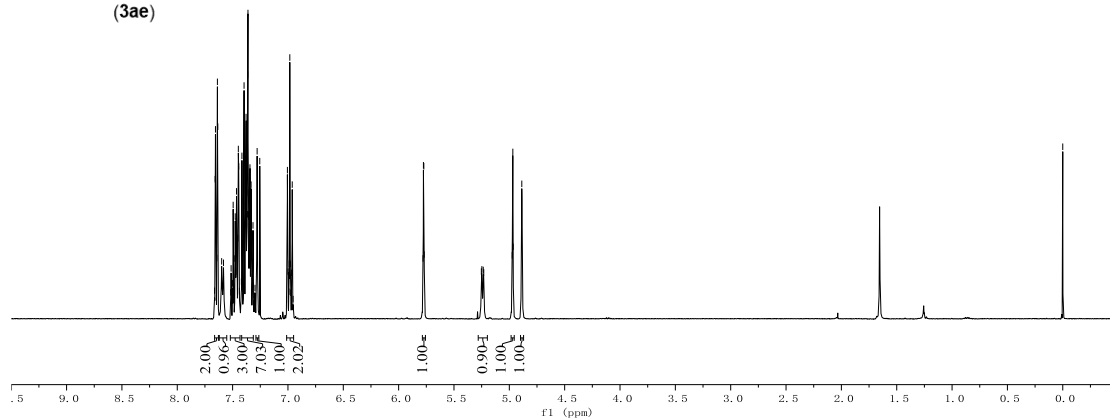

-64.05  
-113.61  
-113.62  
-113.63  
-113.63  
-113.64  
-113.64  
-113.65  
-113.66  
-113.67  
-113.68

(E)-N-(2-(4-fluorobenzylidene)-1-phenyl-3-(trifluoromethyl)but-3-en-1-yl)benzohydrazide

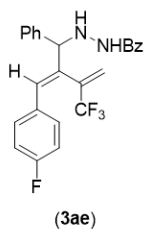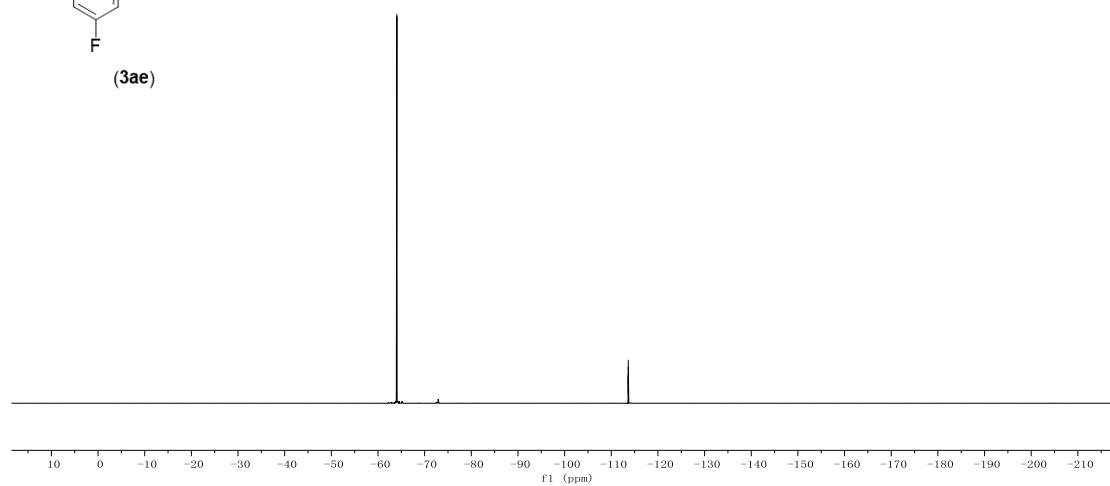

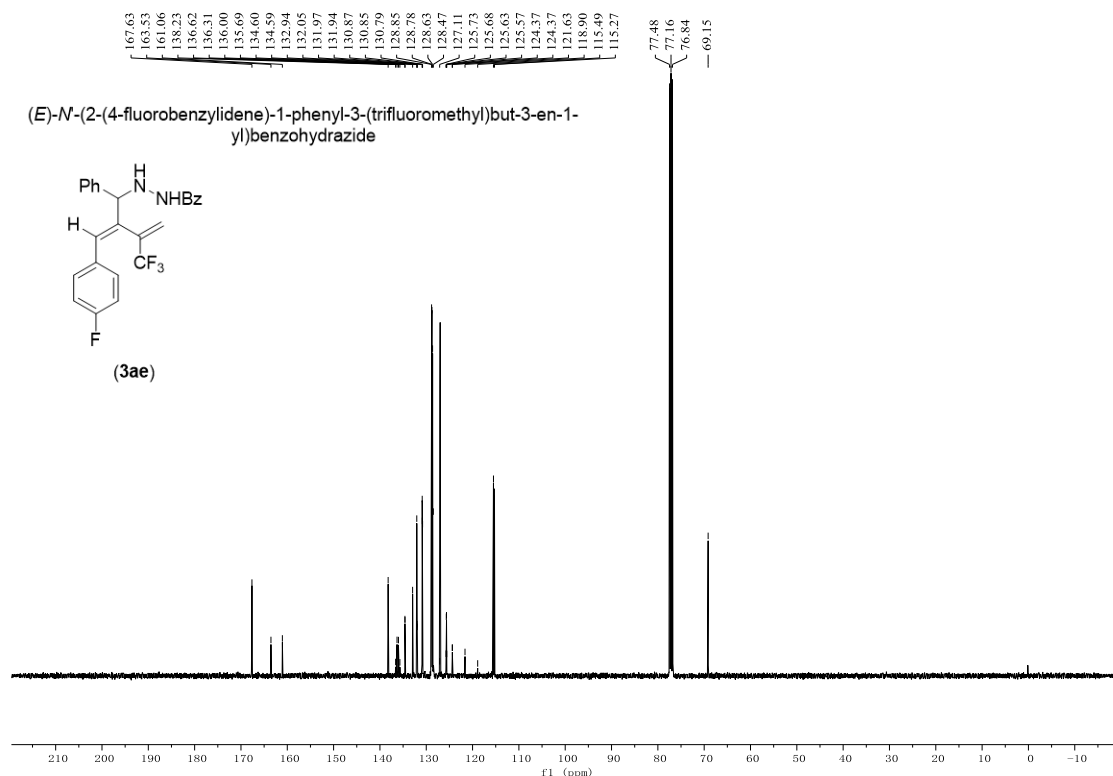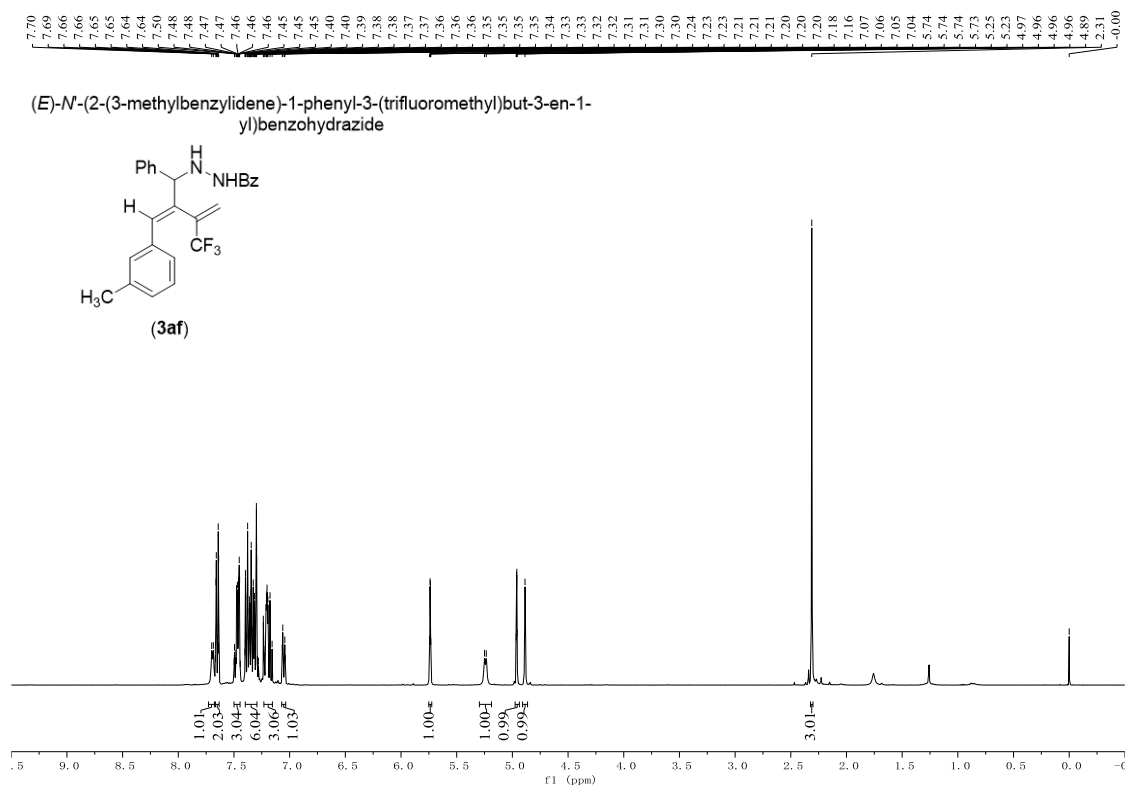

(*E*)-*N'*-(2-(3-methylbenzylidene)-1-phenyl-3-(trifluoromethyl)but-3-en-1-yl)benzohydrazide

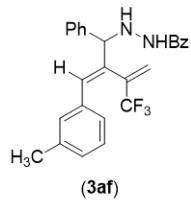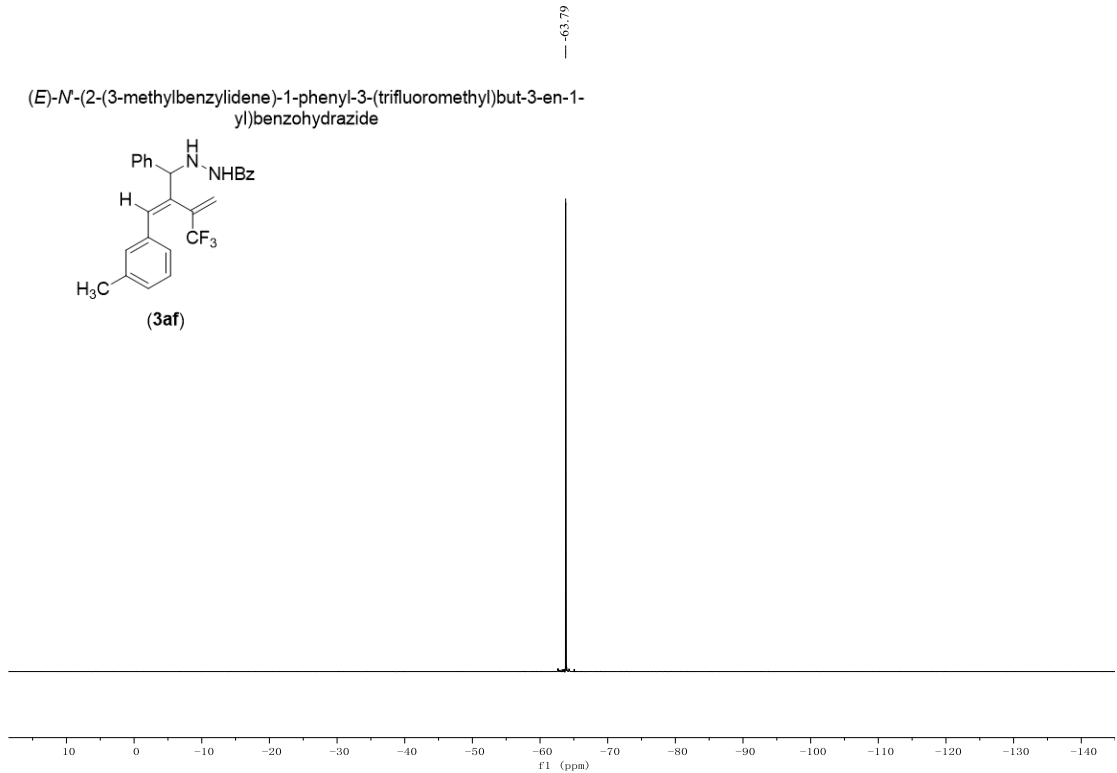

(*E*)-*N'*-(2-(3-methylbenzylidene)-1-phenyl-3-(trifluoromethyl)but-3-en-1-yl)benzohydrazide

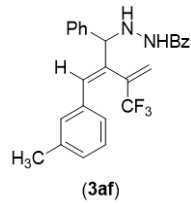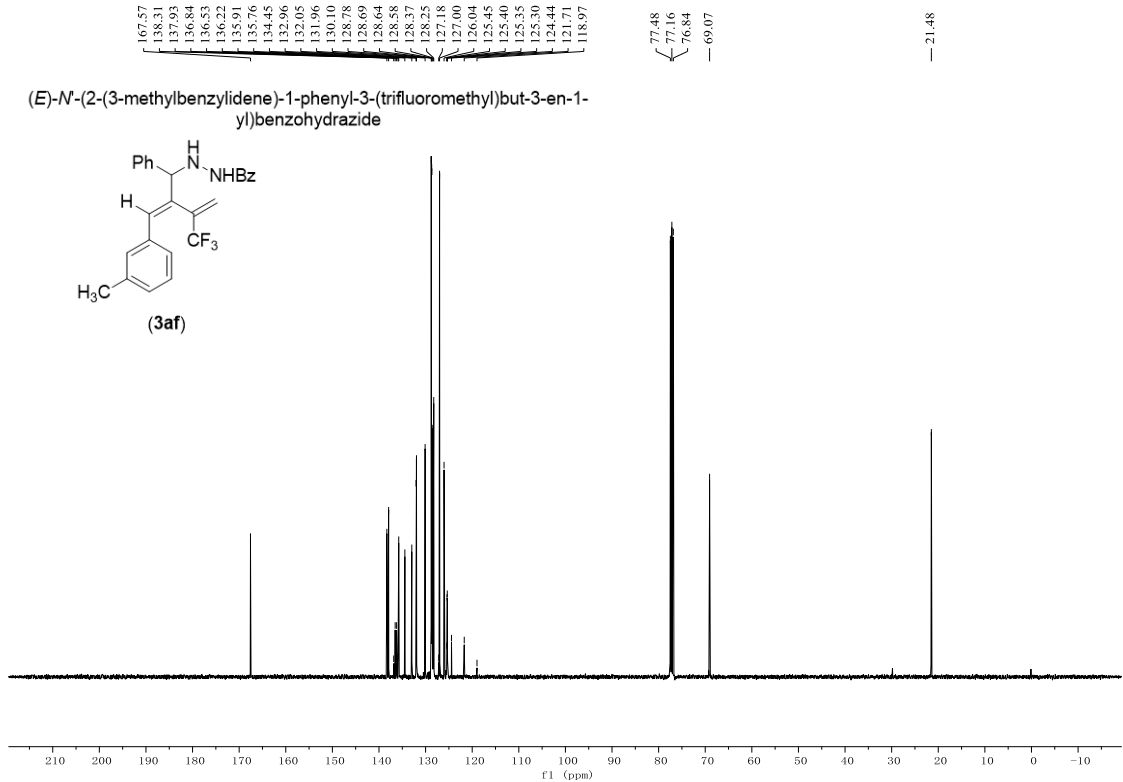

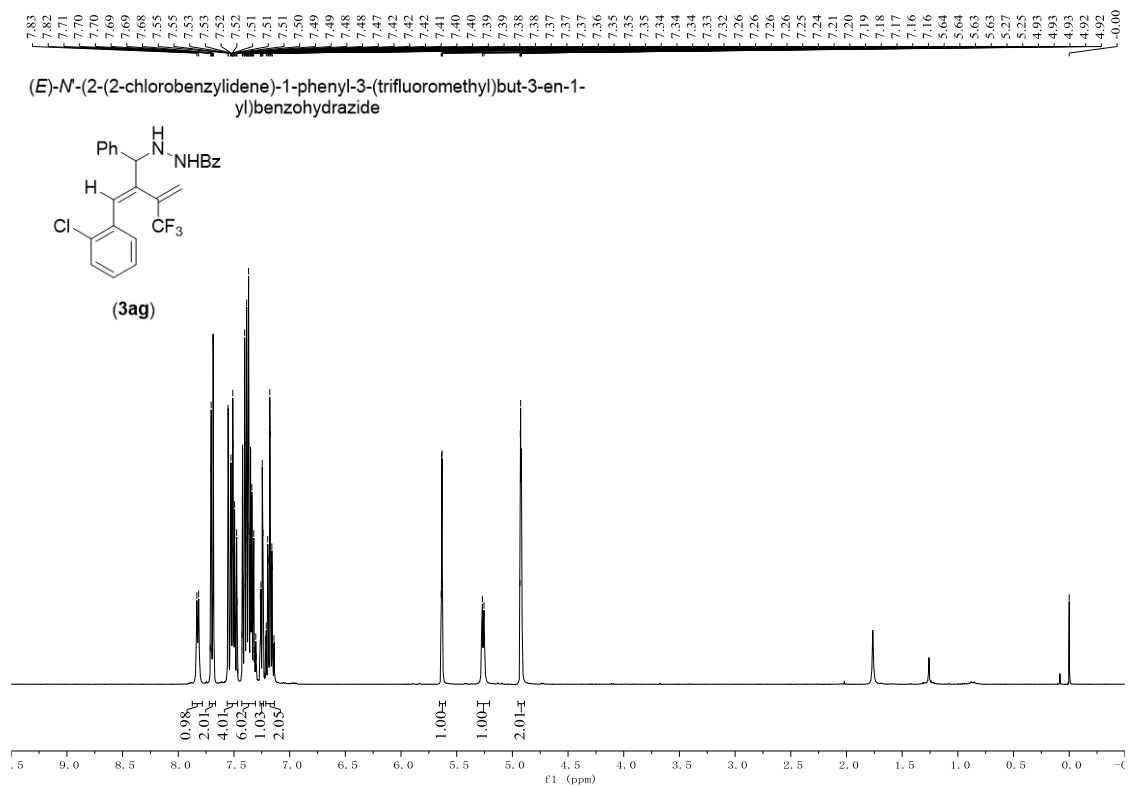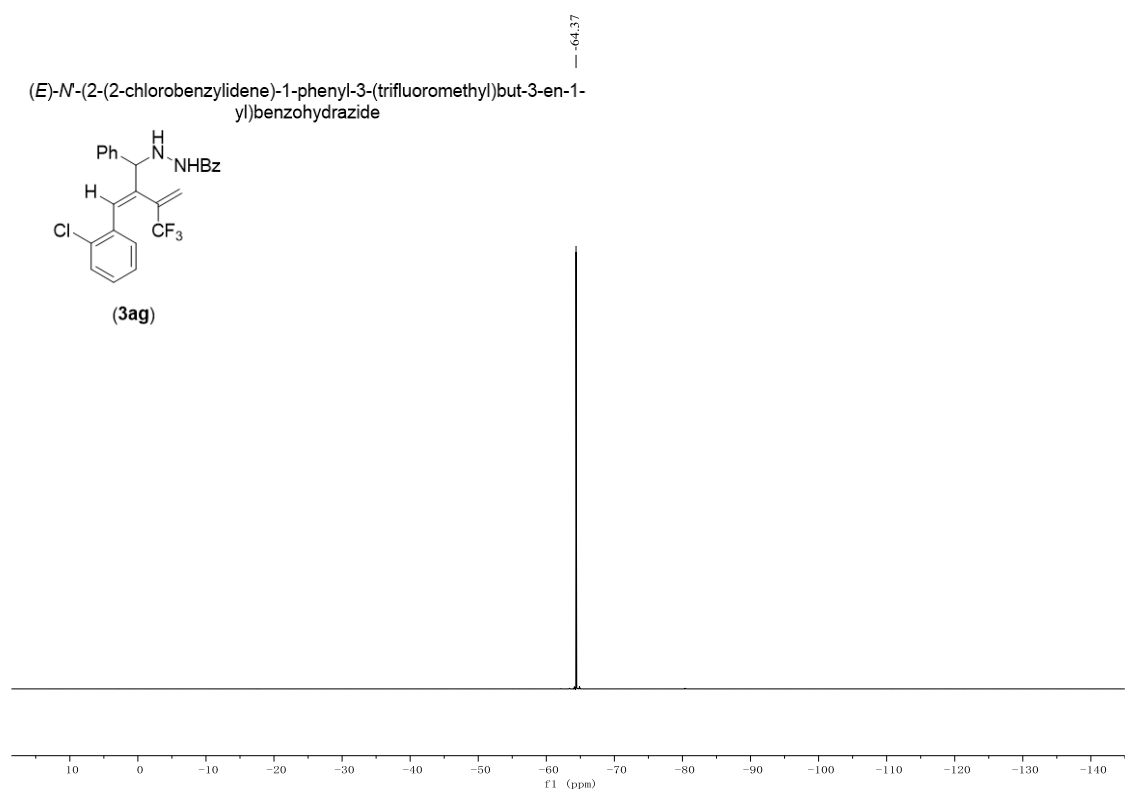

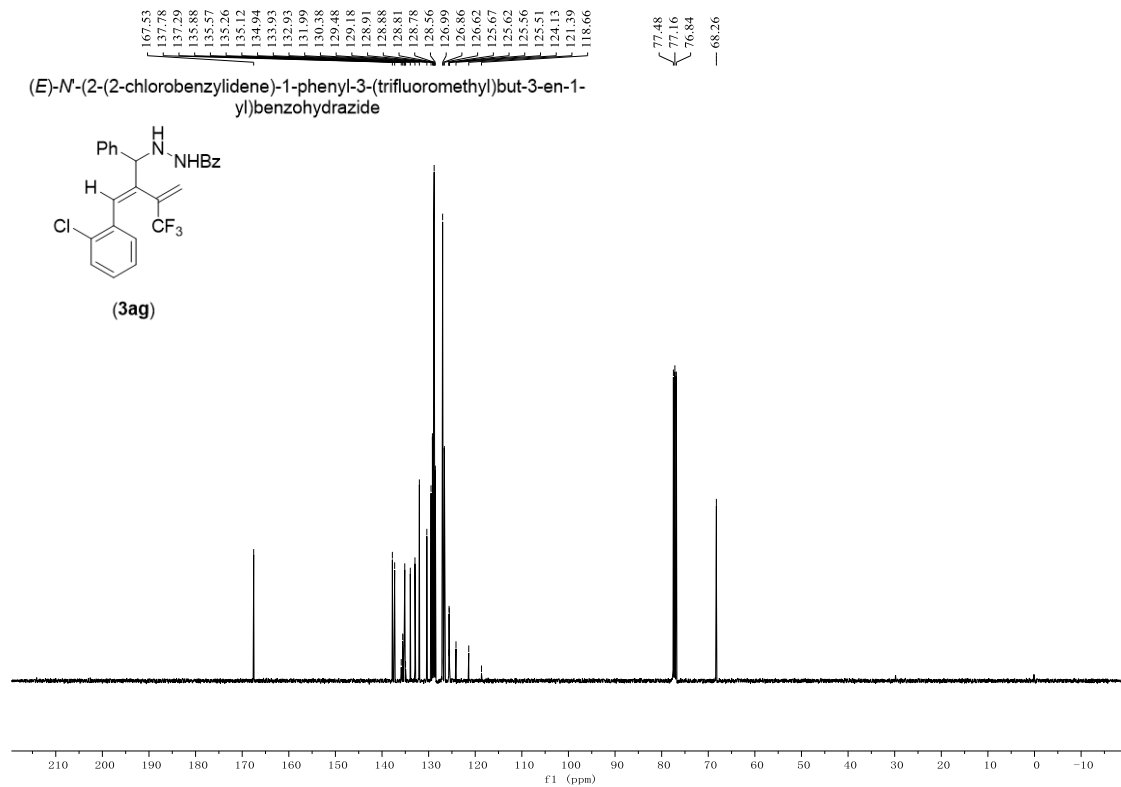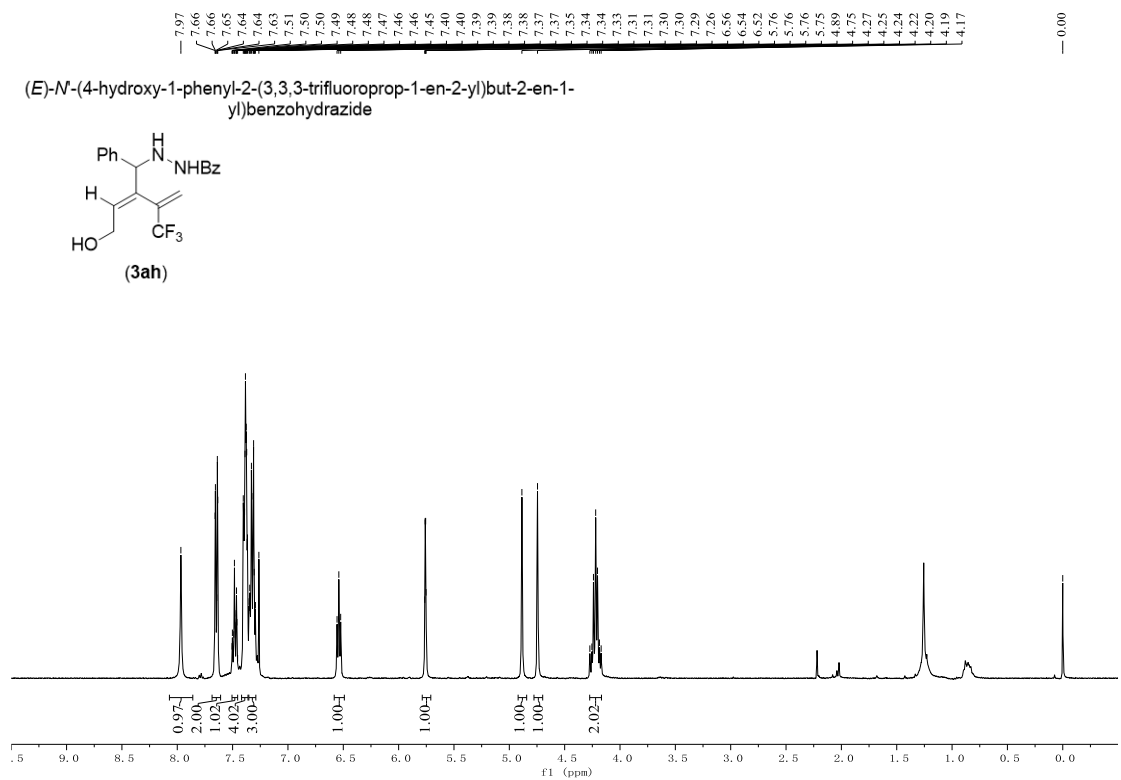

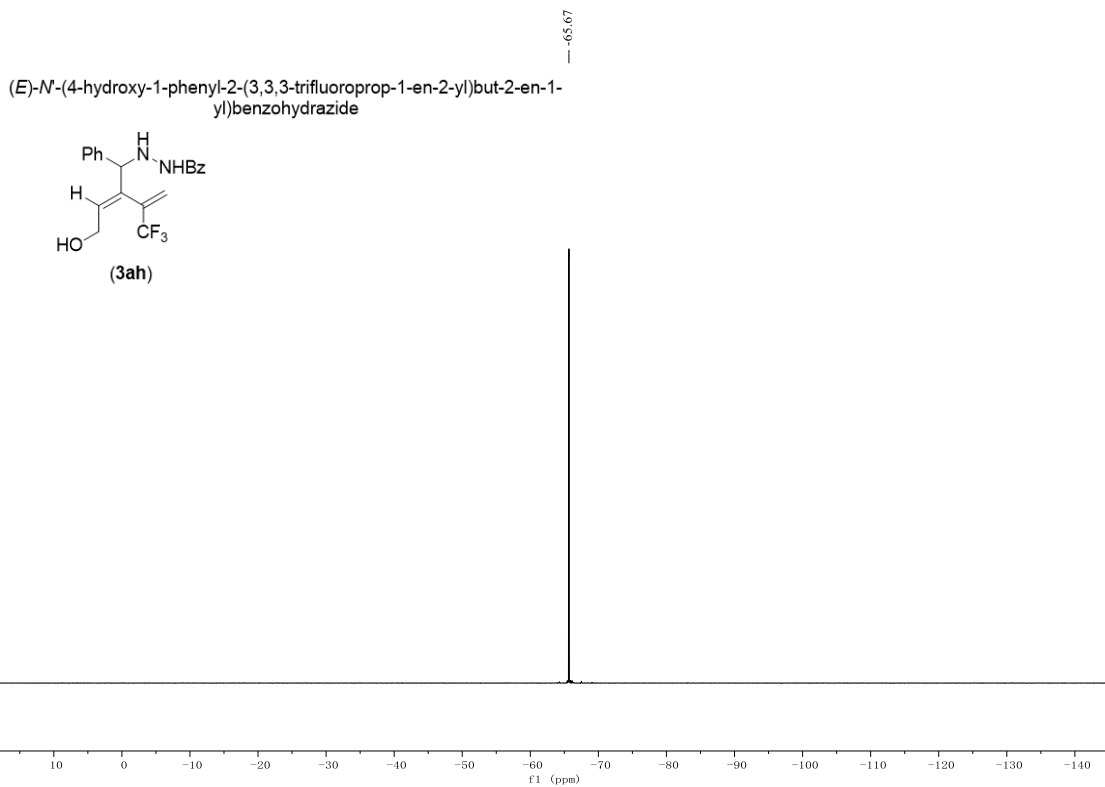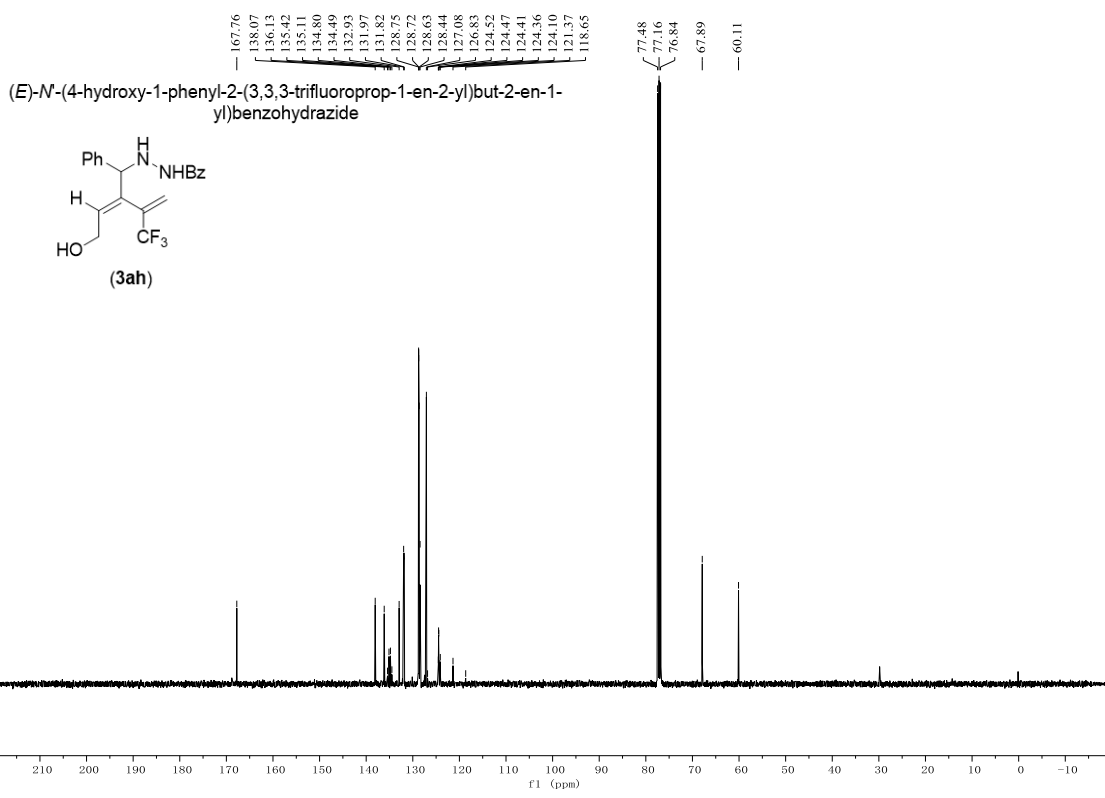

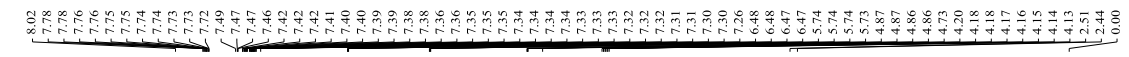

(E)-4-((2-benzoylhydrazinyl)(phenyl)methyl)-5-(trifluoromethyl)hexa-3,5-dien-1-yl 4-methylbenzenesulfonate

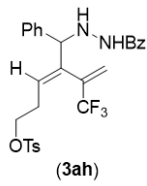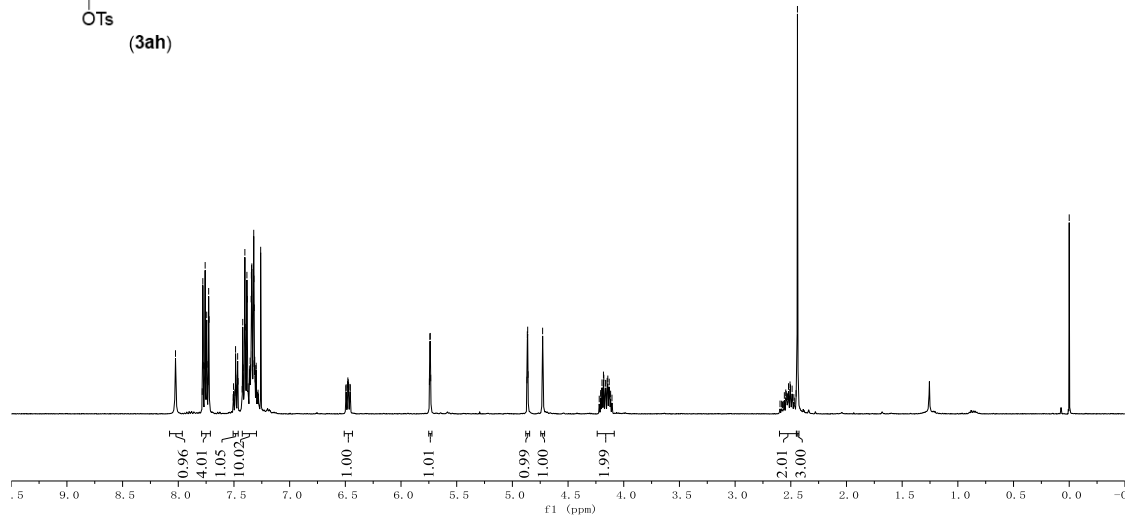

-65.69

(E)-4-((2-benzoylhydrazinyl)(phenyl)methyl)-5-(trifluoromethyl)hexa-3,5-dien-1-yl 4-methylbenzenesulfonate

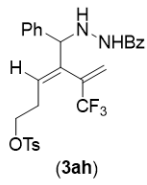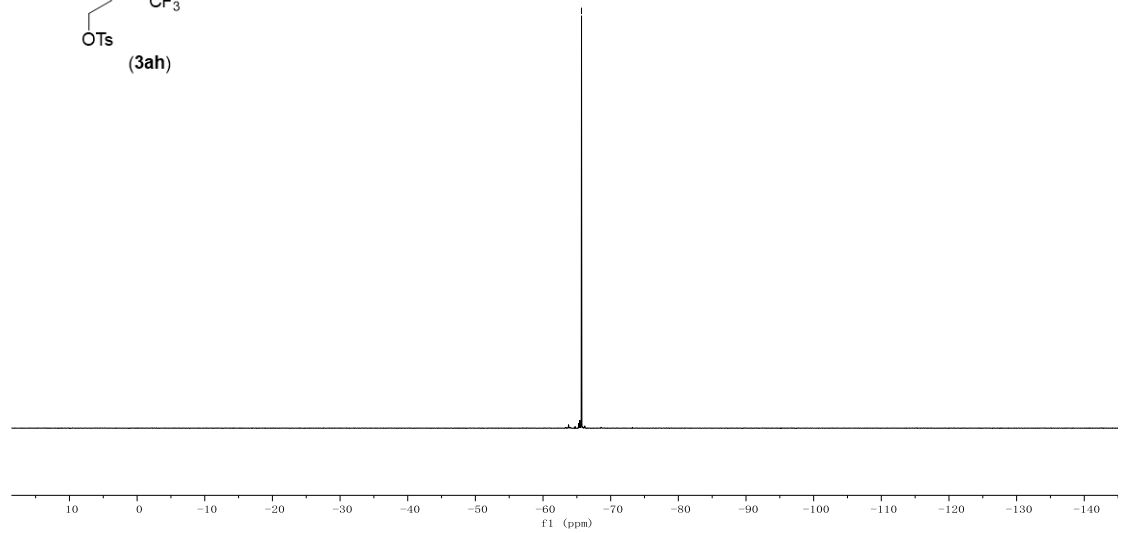

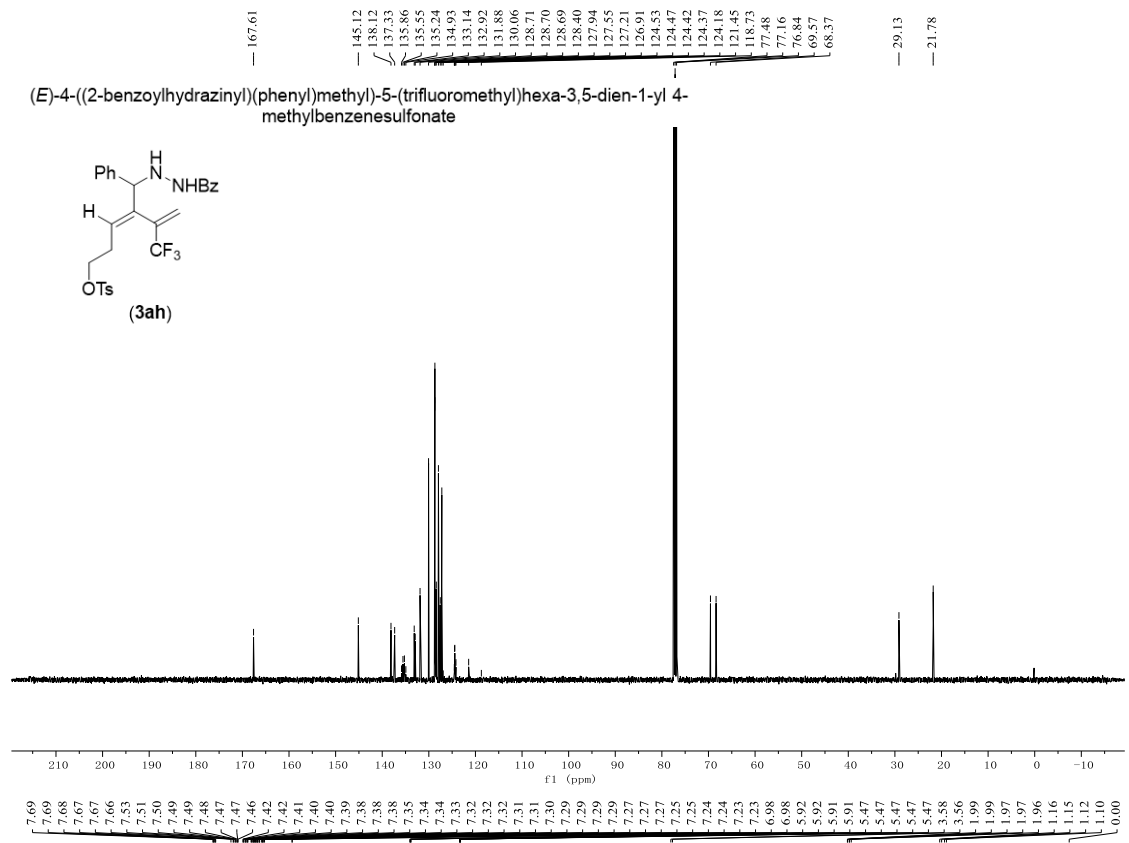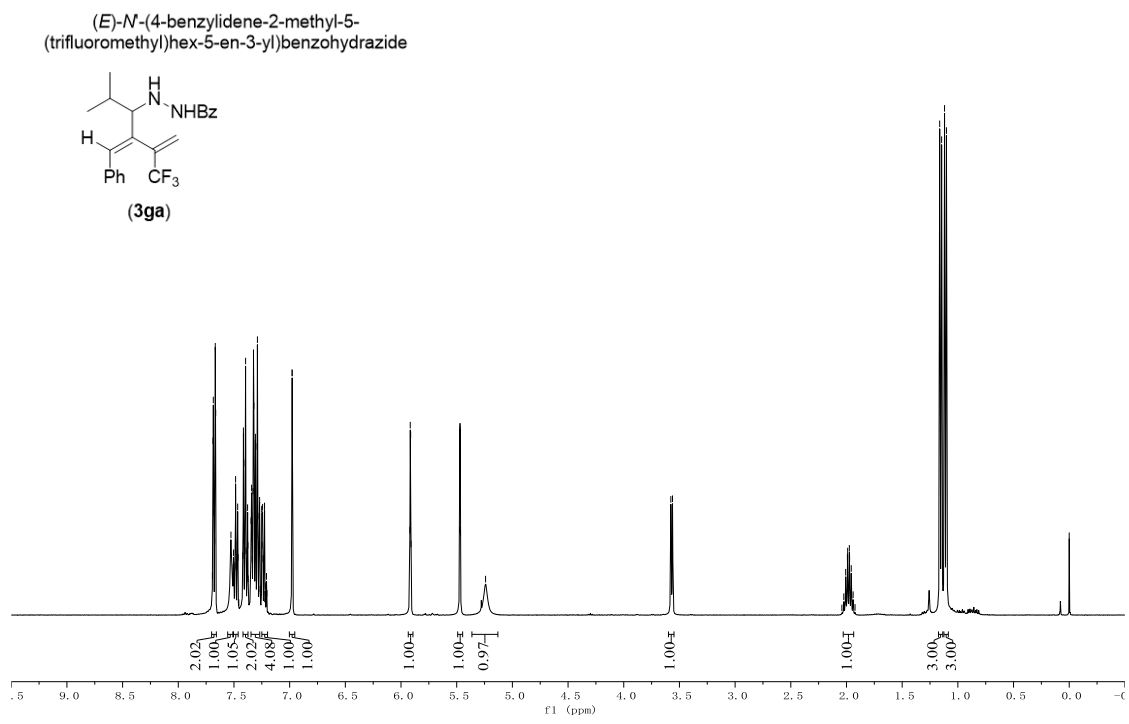



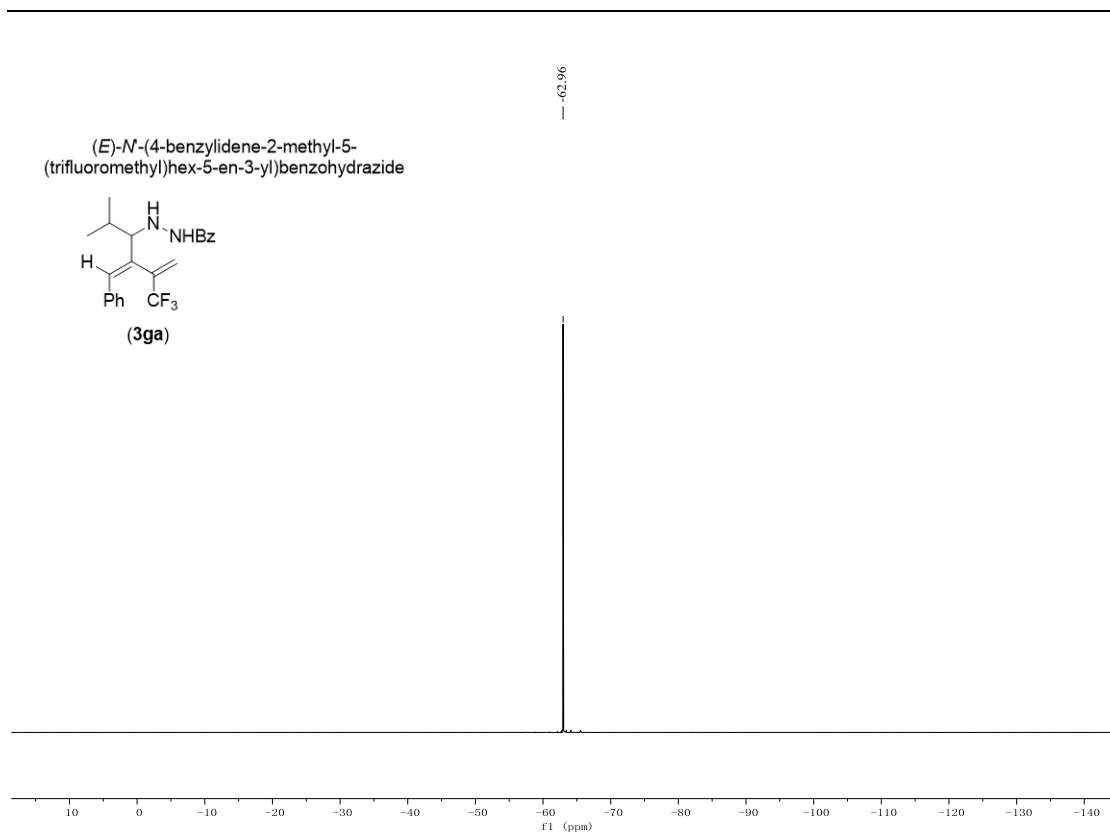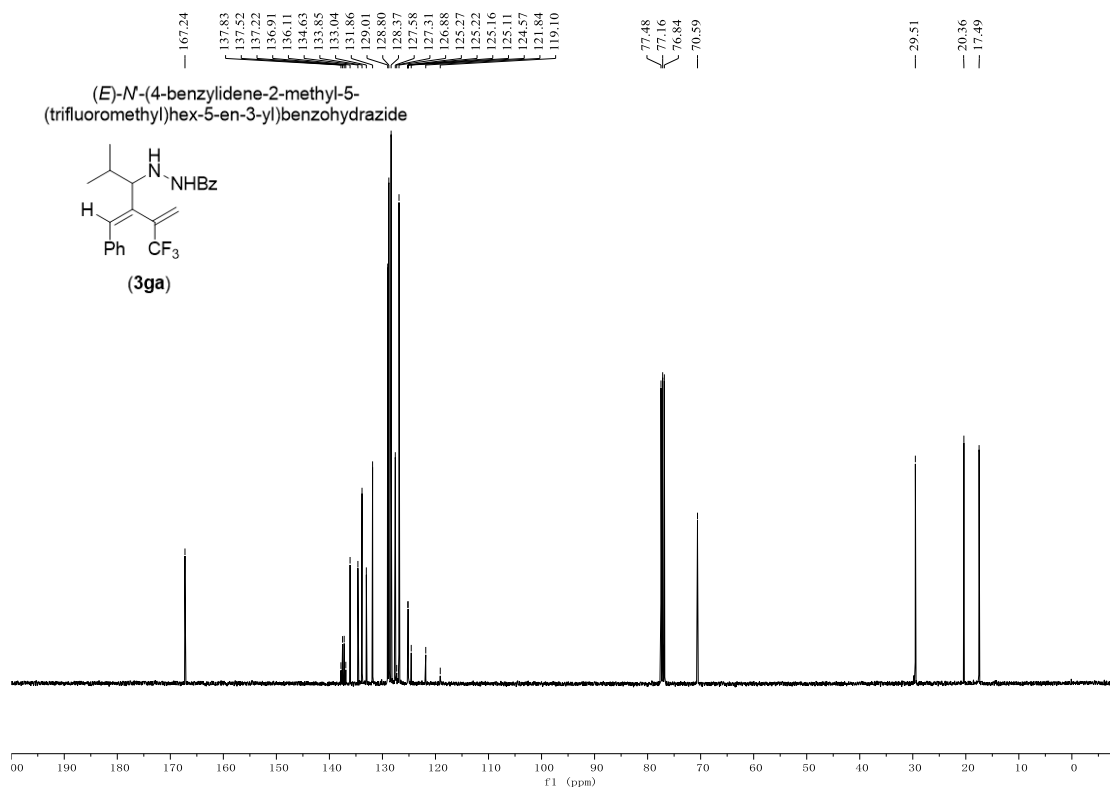

1D NOESY of **3ga**

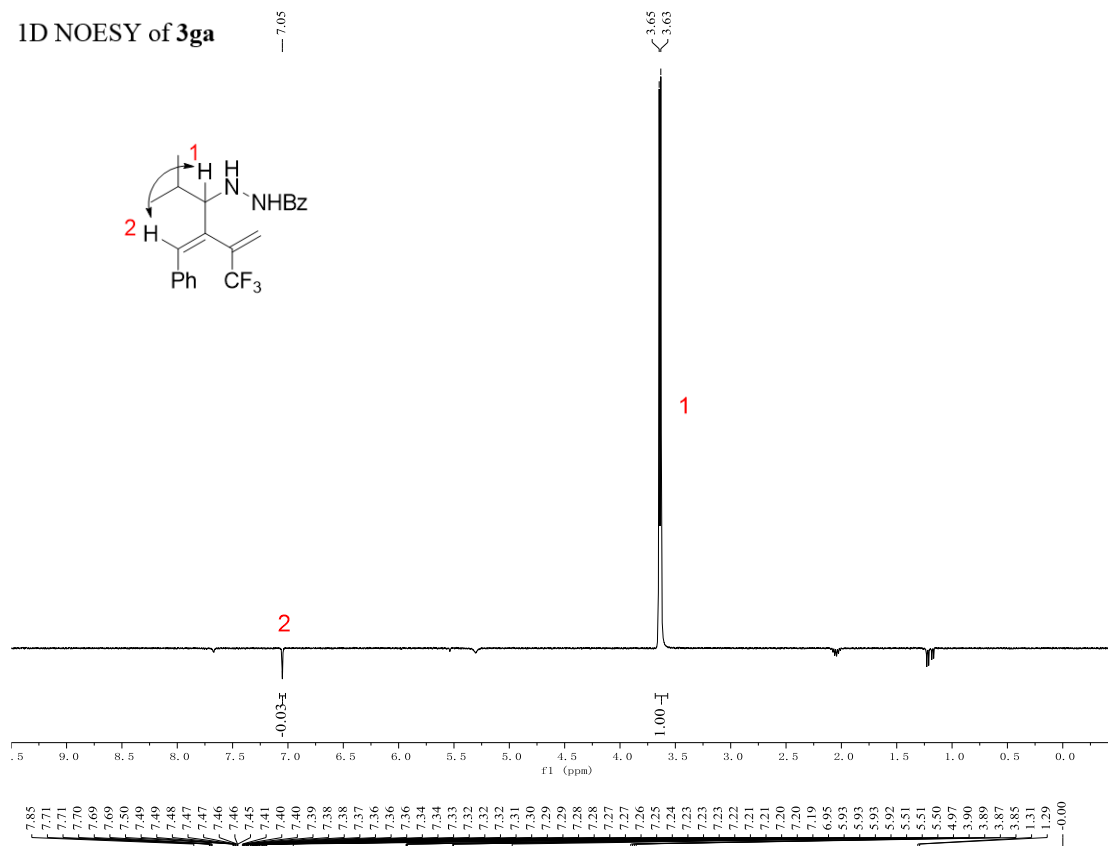

(*E*)-*N*-(3-benzylidene-4-(trifluoromethyl)pent-4-en-2-yl)benzohydrazide

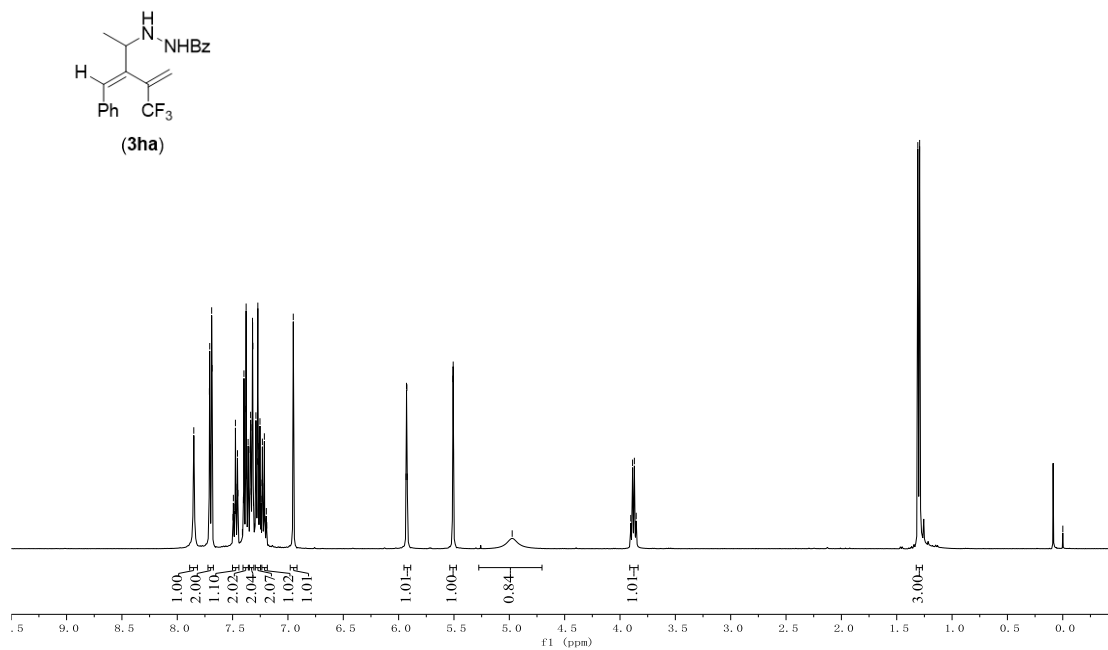

(E)-N-(3-benzylidene-4-(trifluoromethyl)pent-4-en-2-yl)benzohydrazide

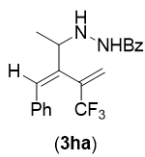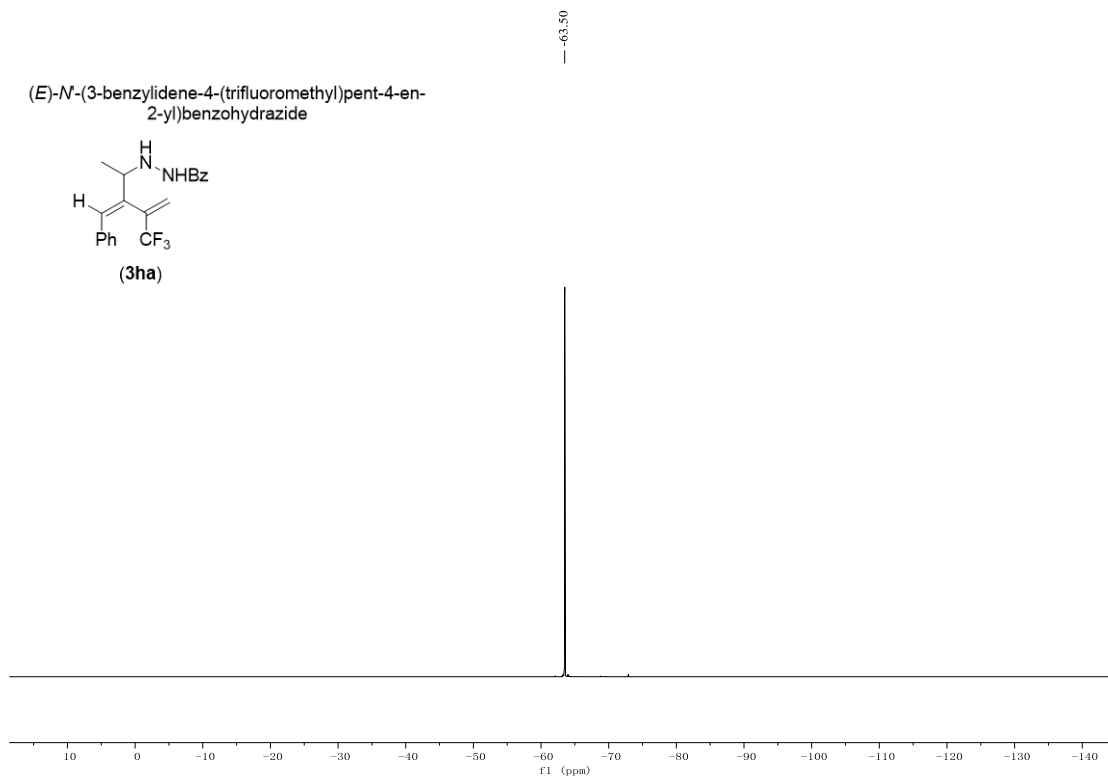

(E)-N-(3-benzylidene-4-(trifluoromethyl)pent-4-en-2-yl)benzohydrazide

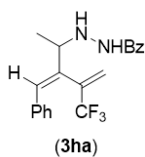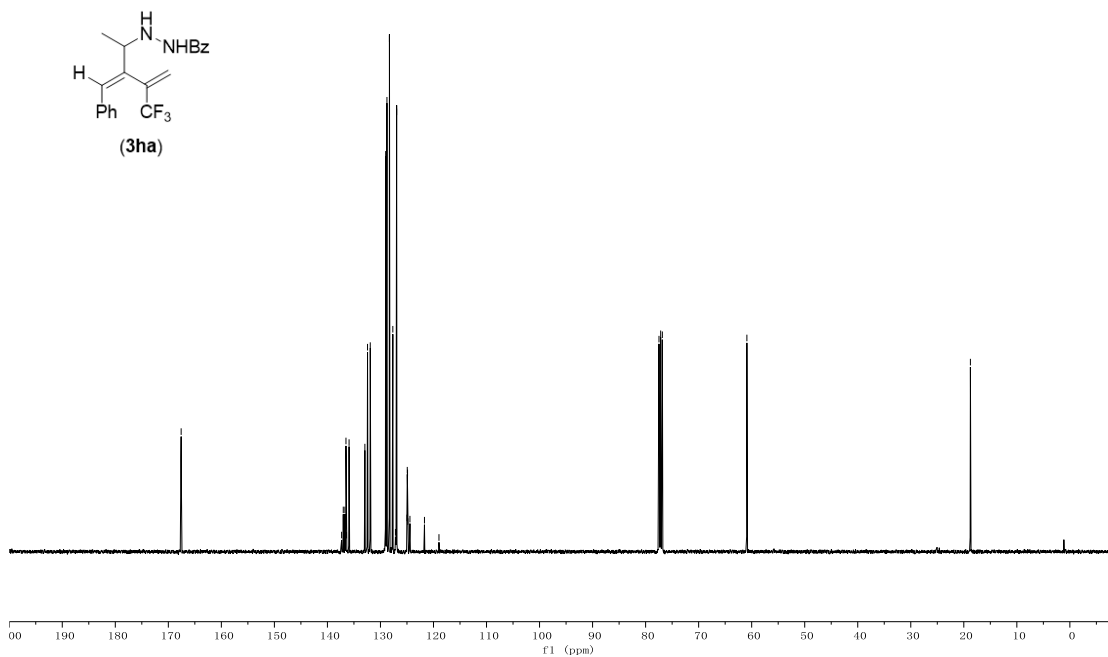

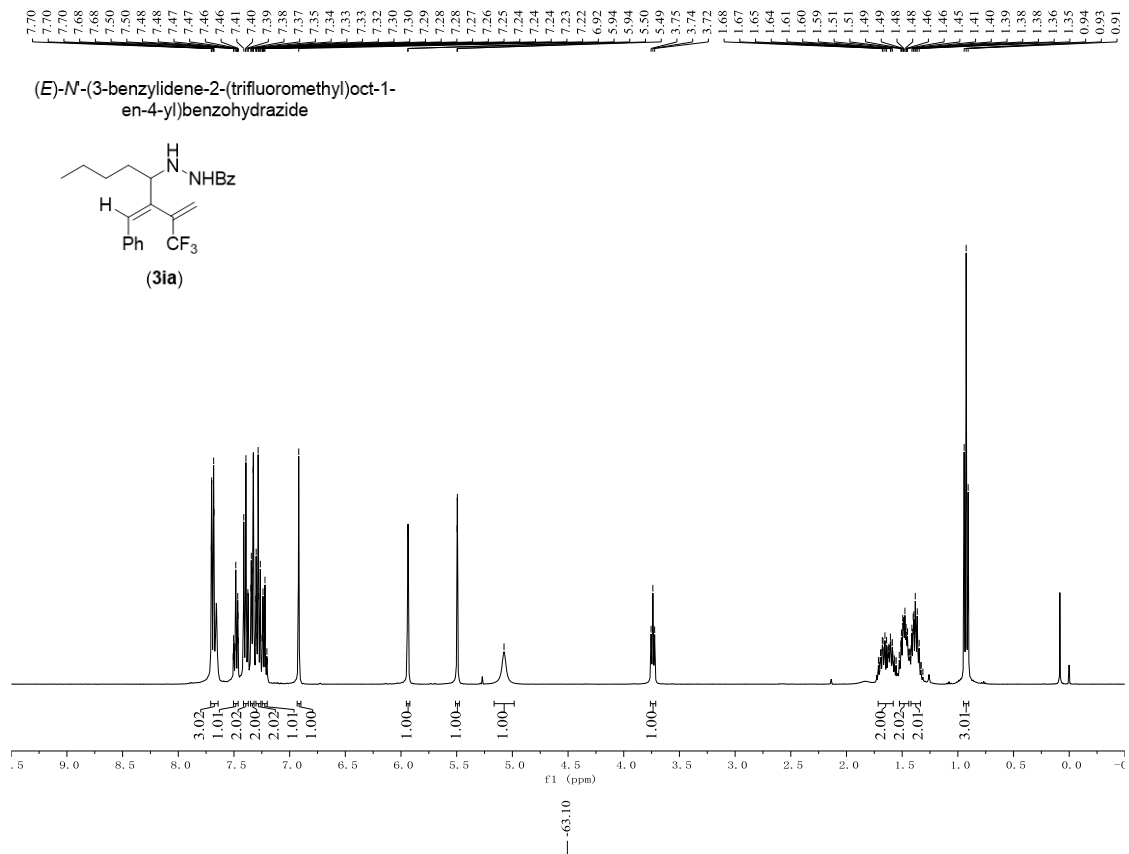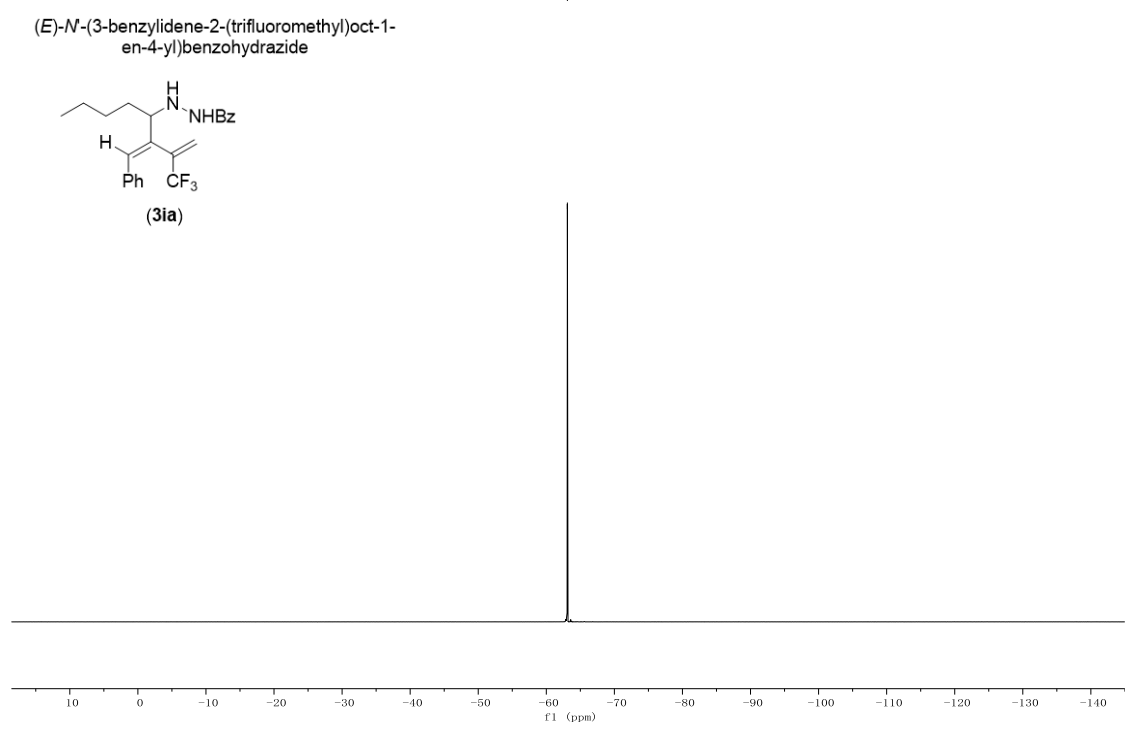

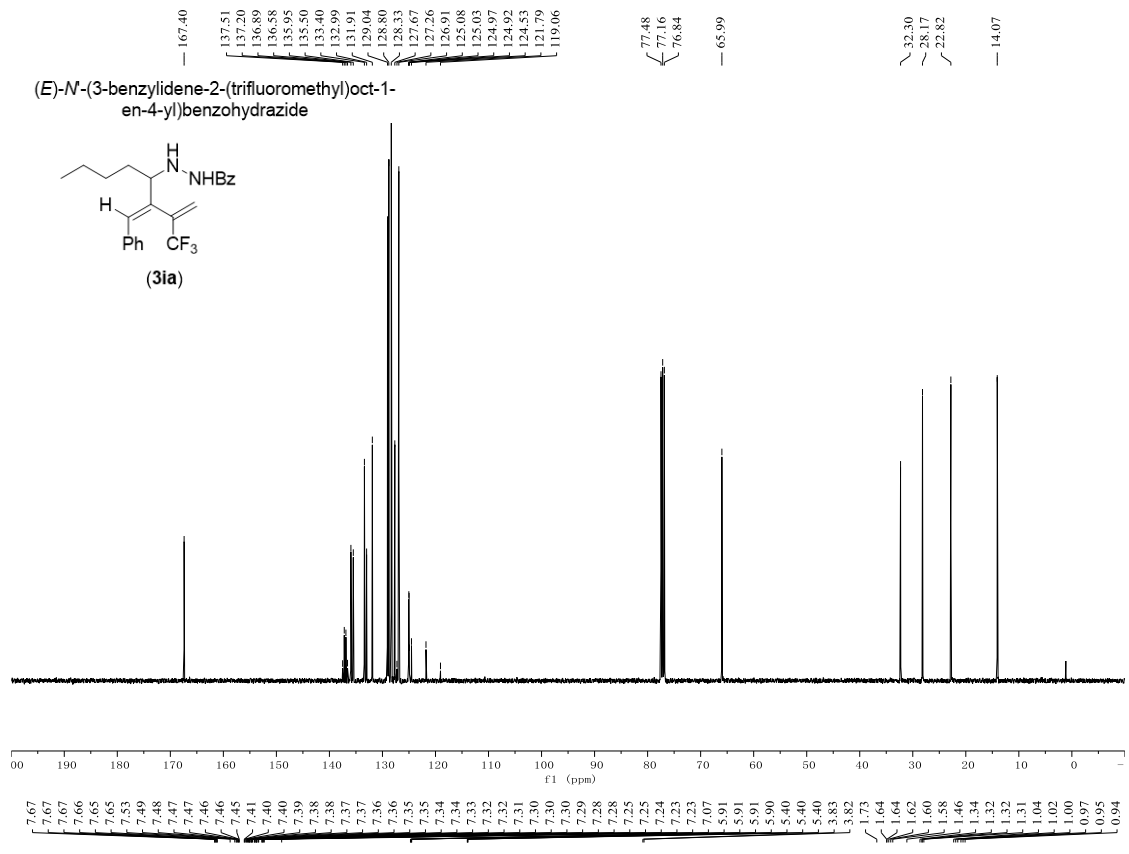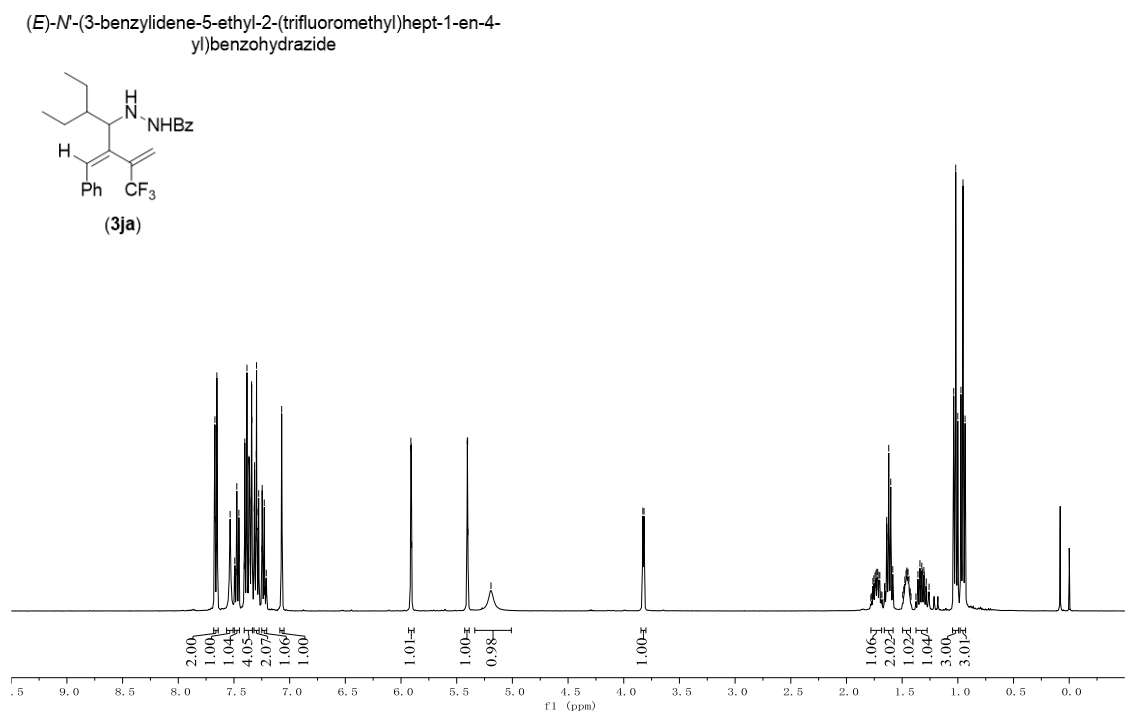

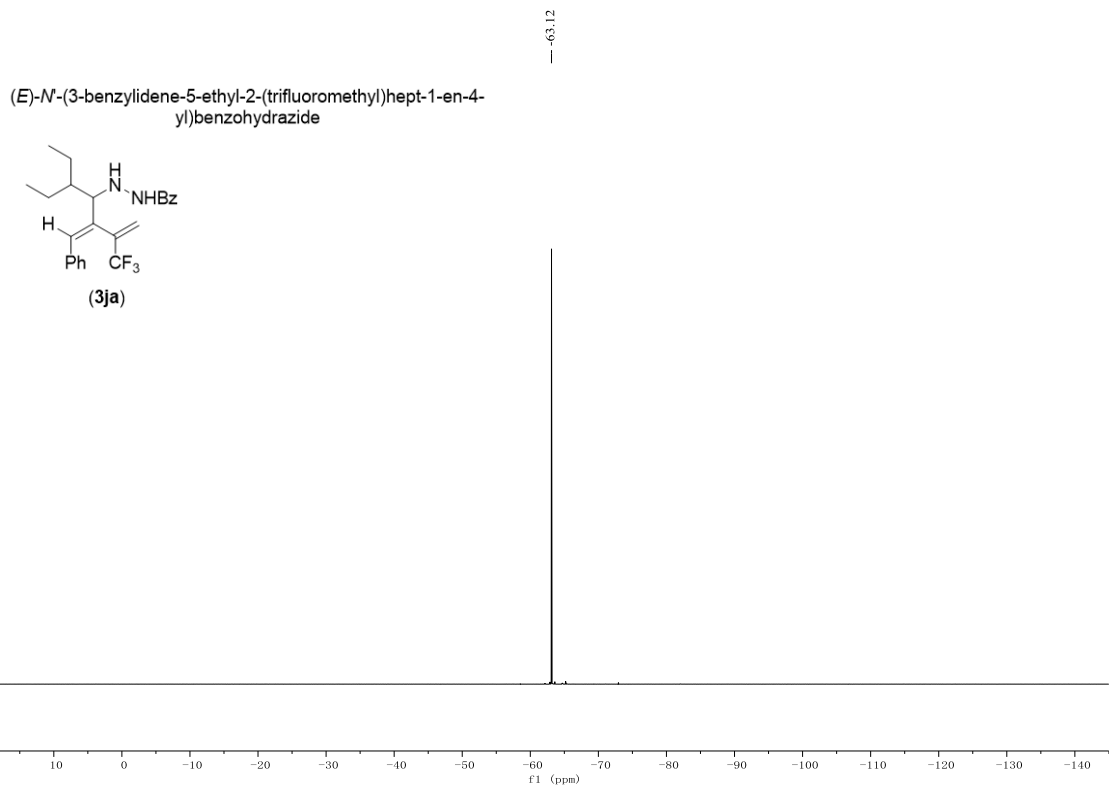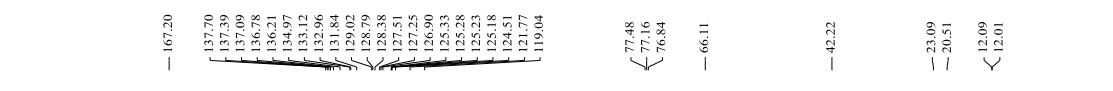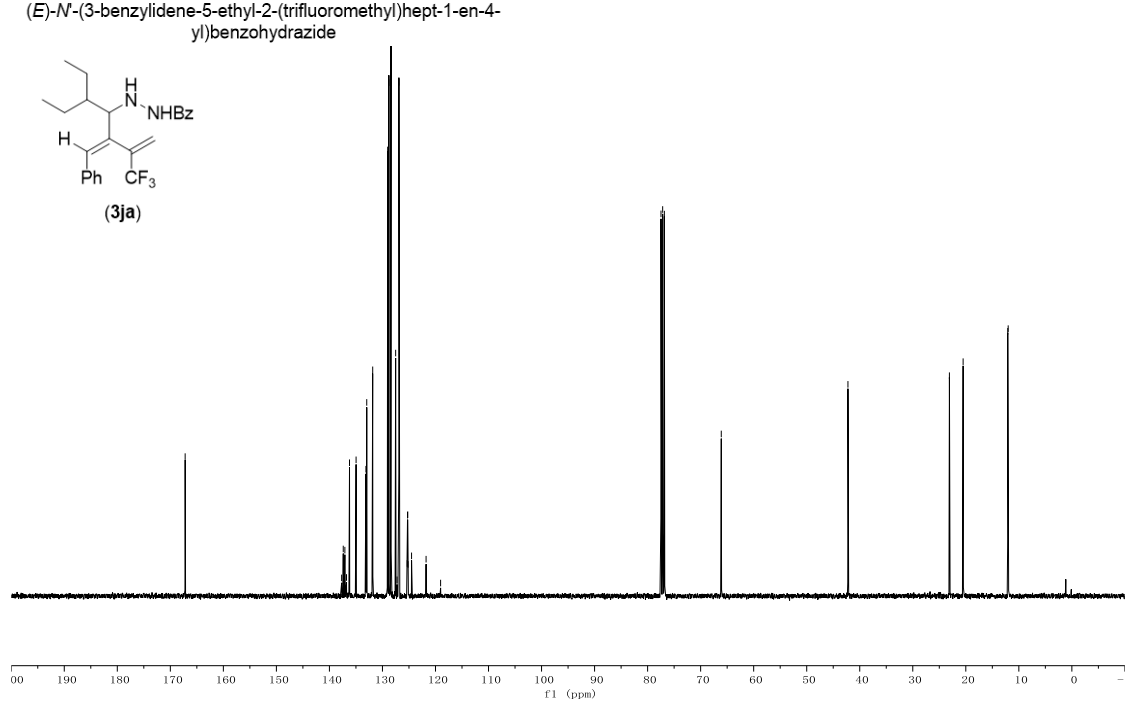

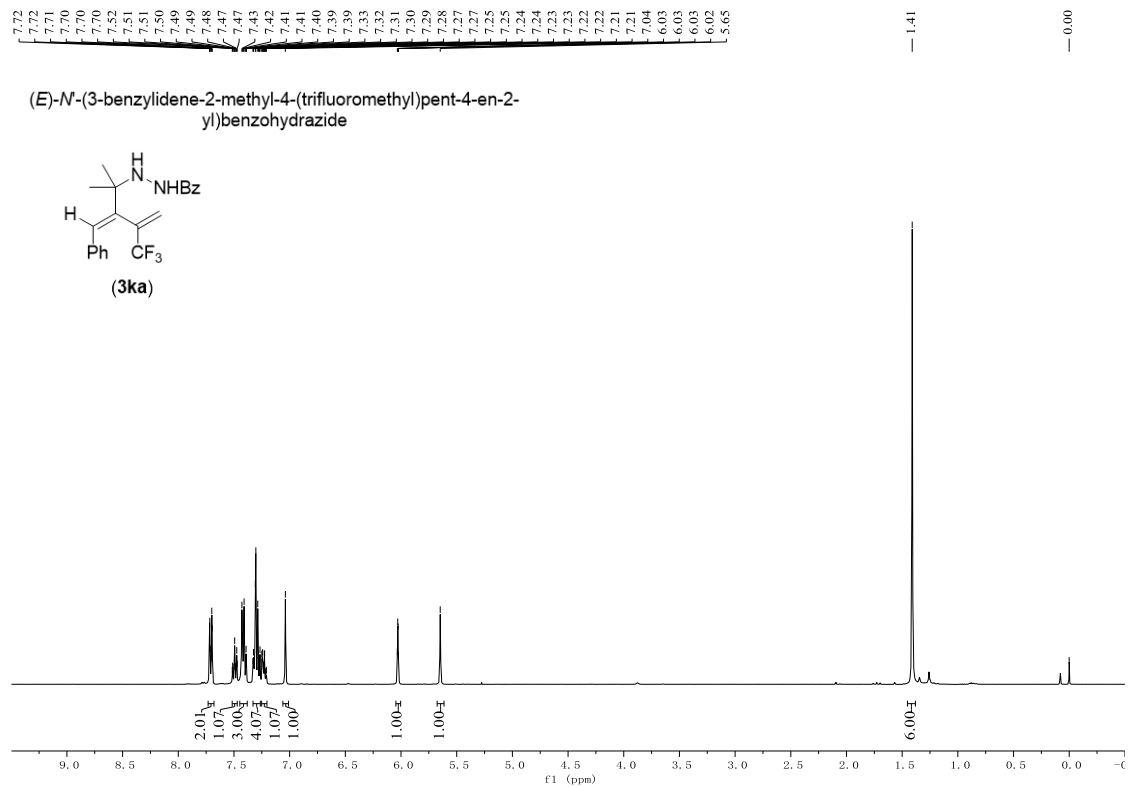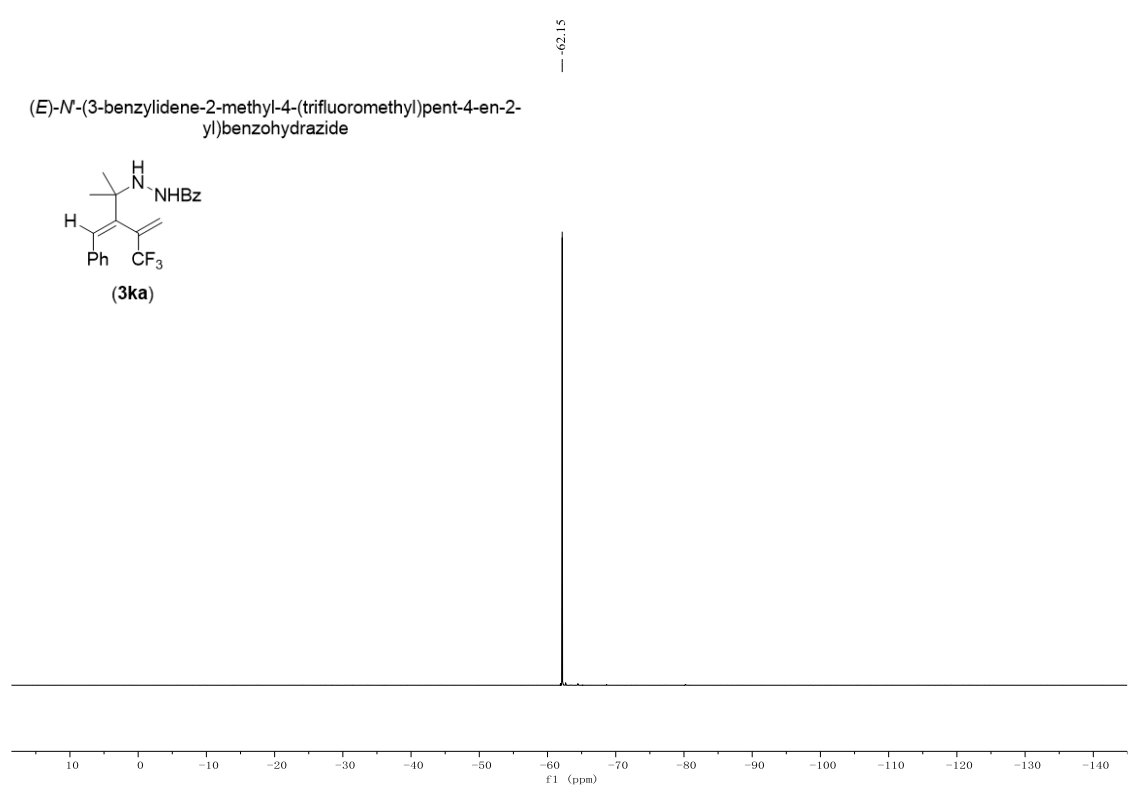

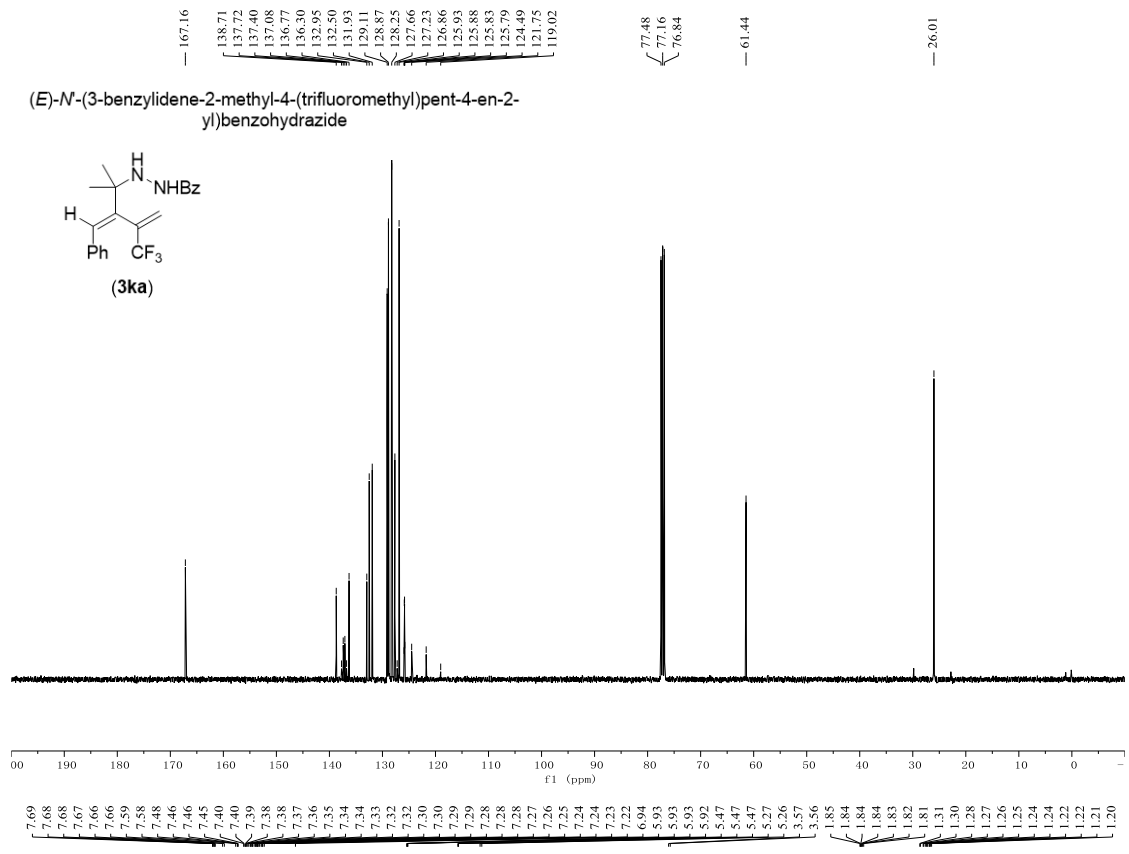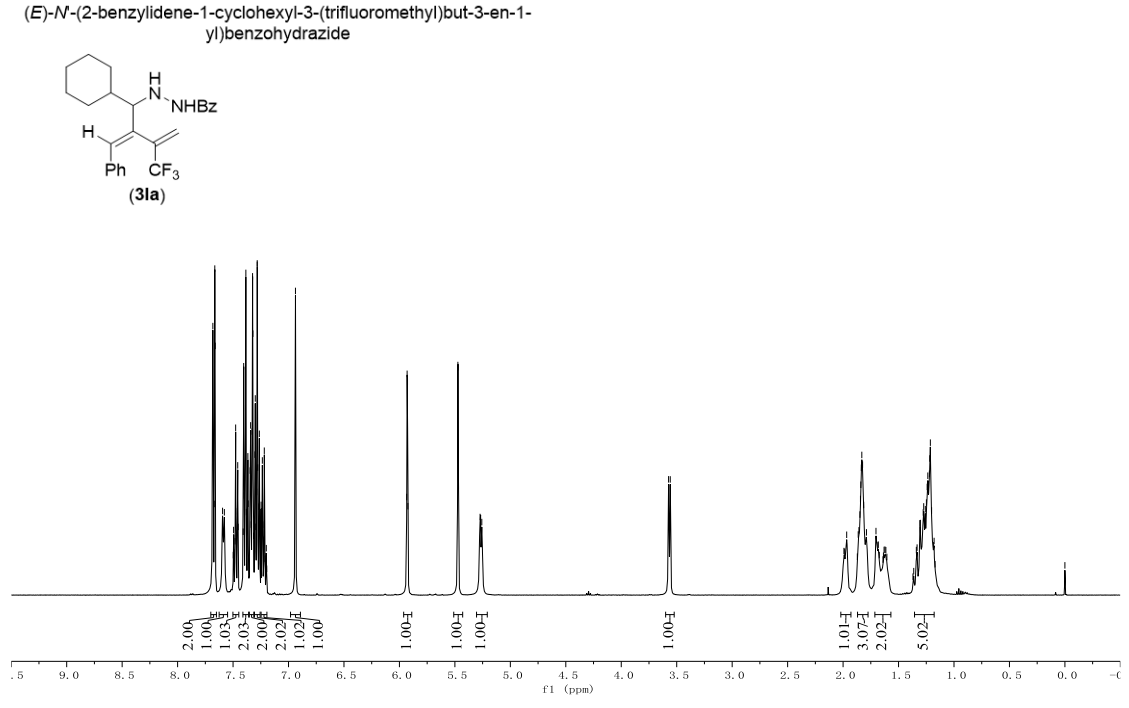



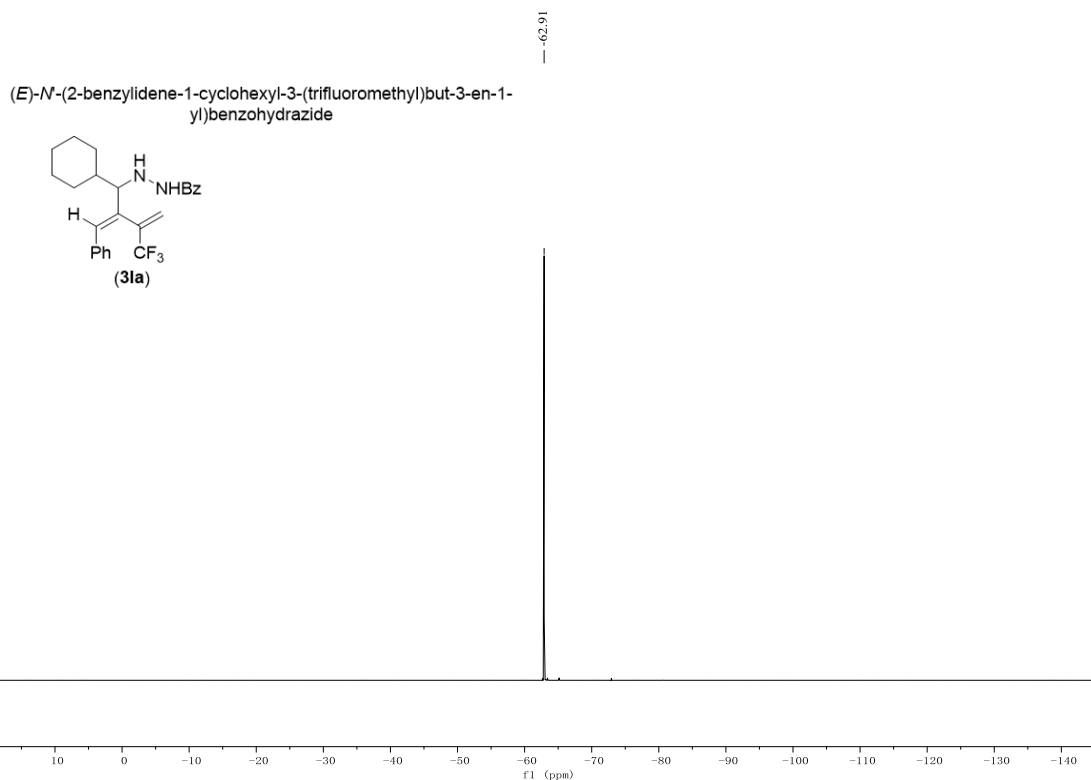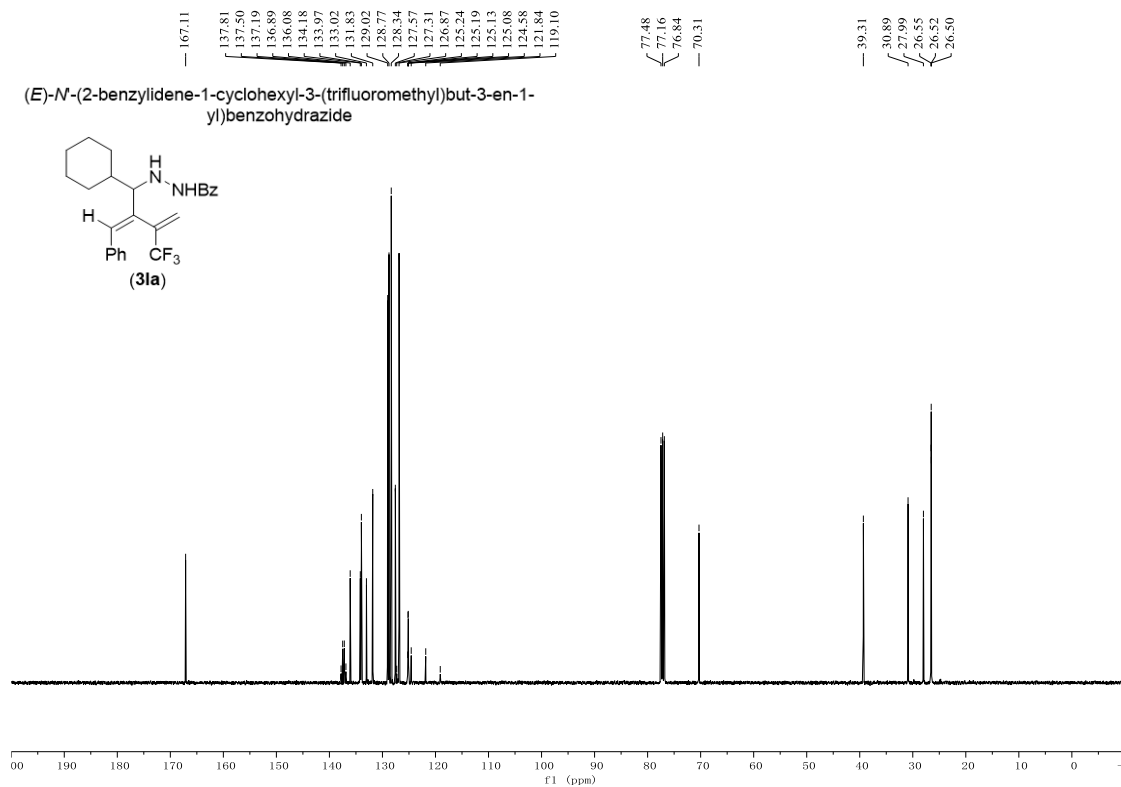

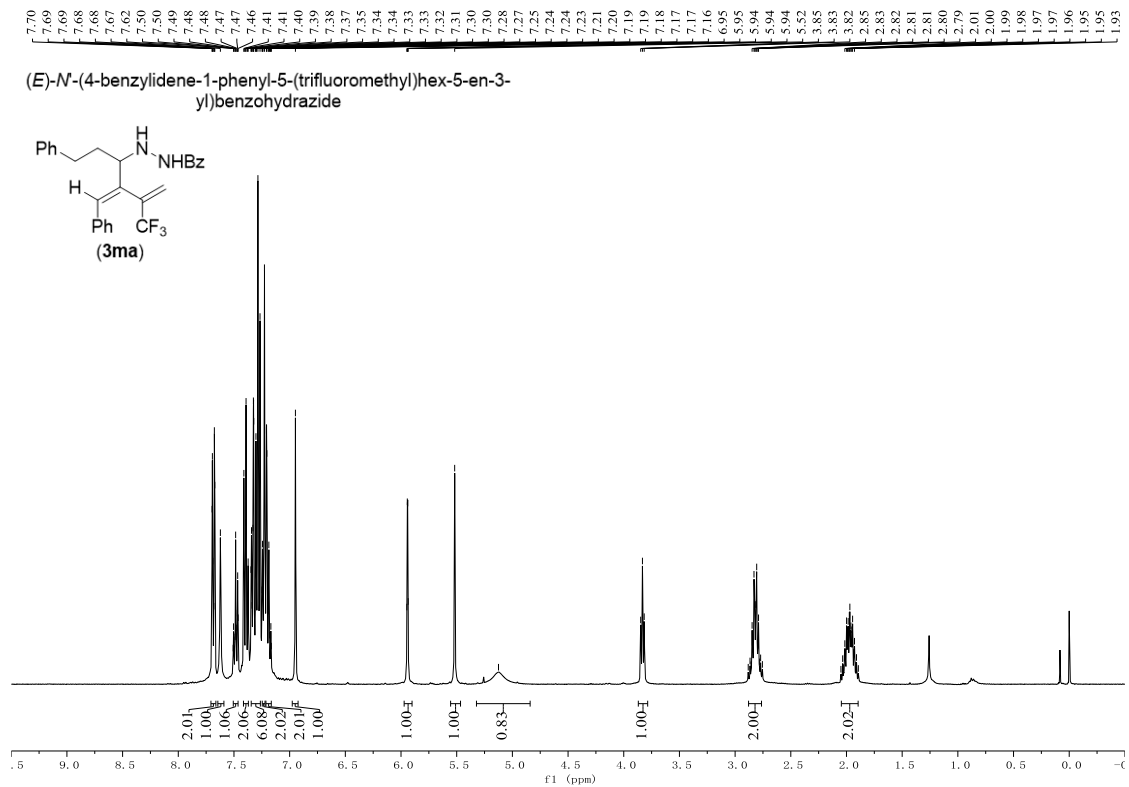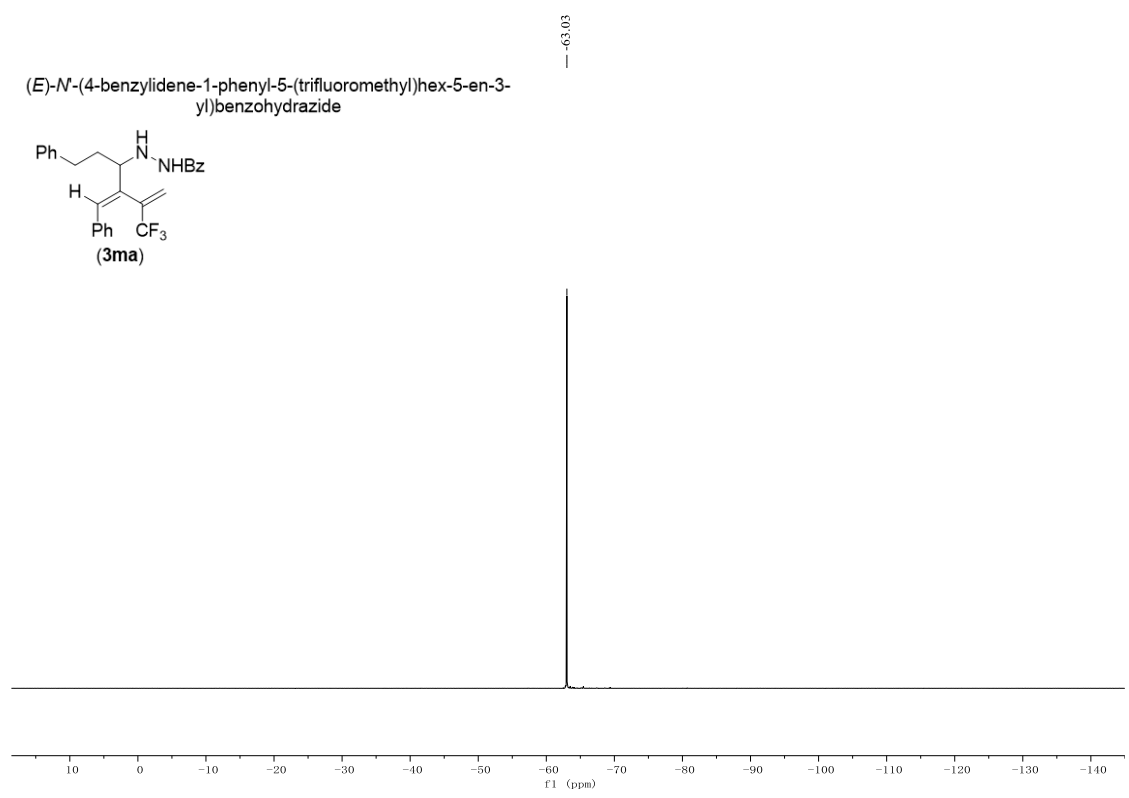

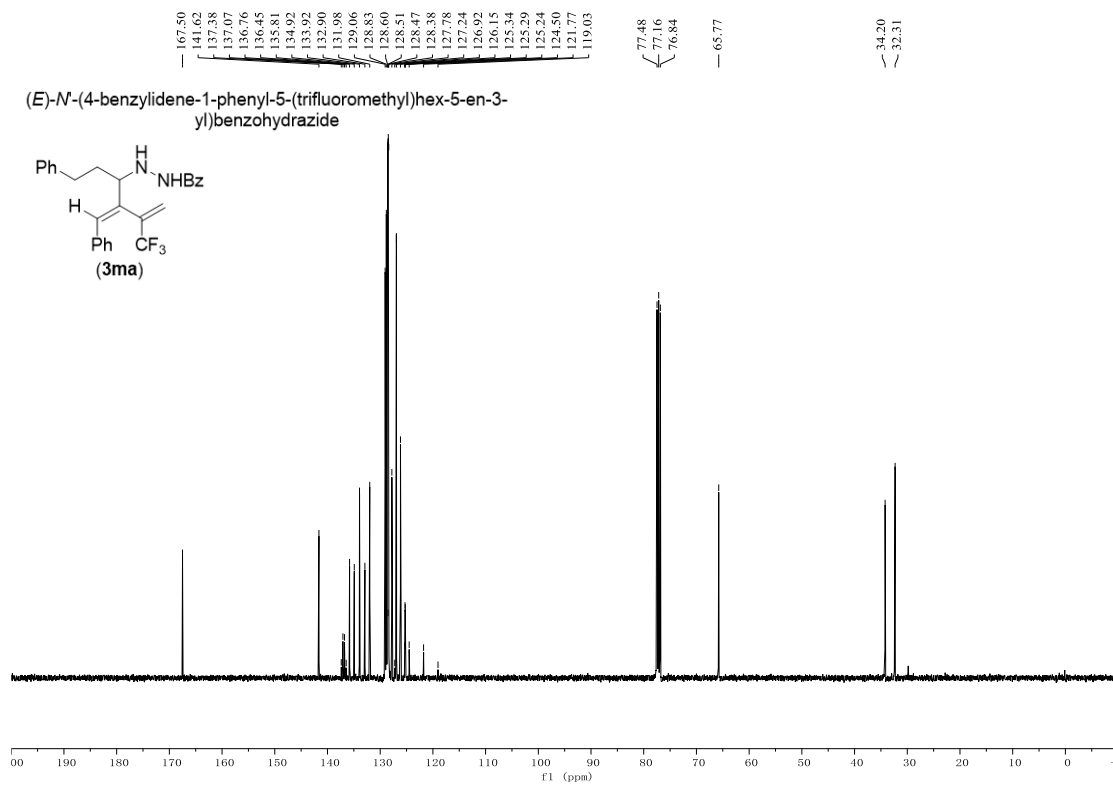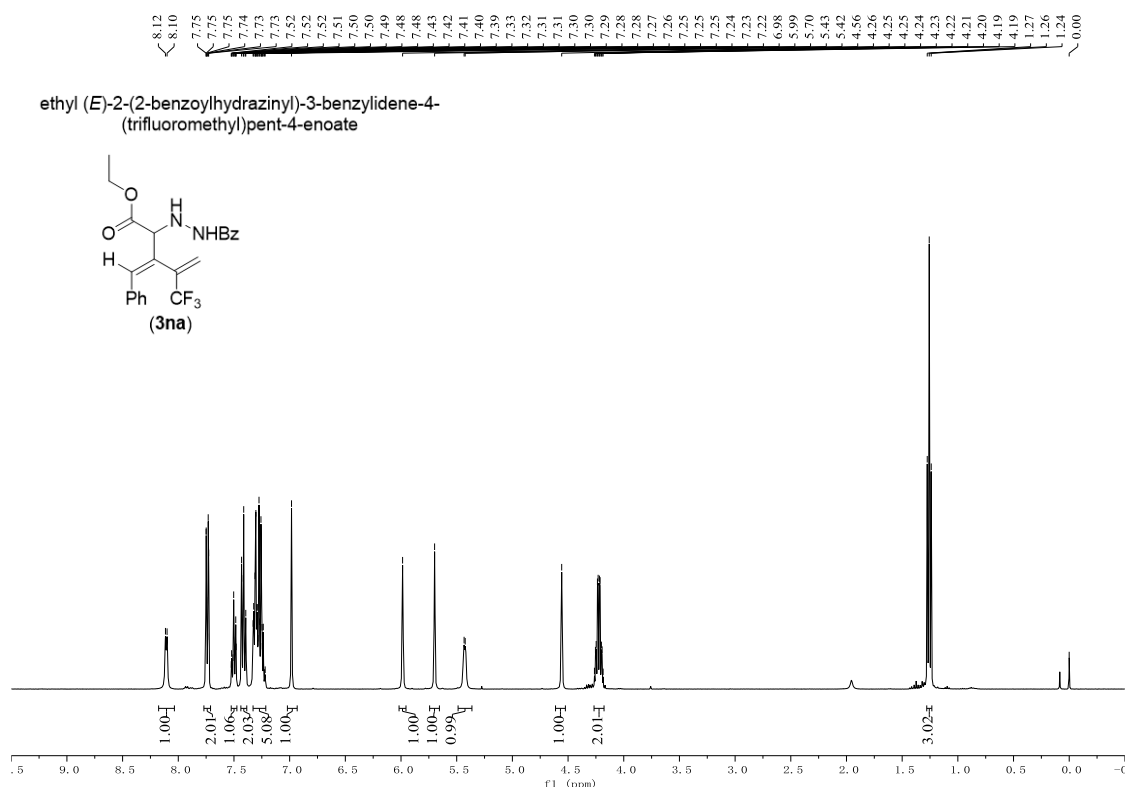

ethyl (*E*)-2-(2-benzoylhydrazinyl)-3-benzylidene-4-(trifluoromethyl)pent-4-enoate

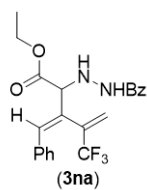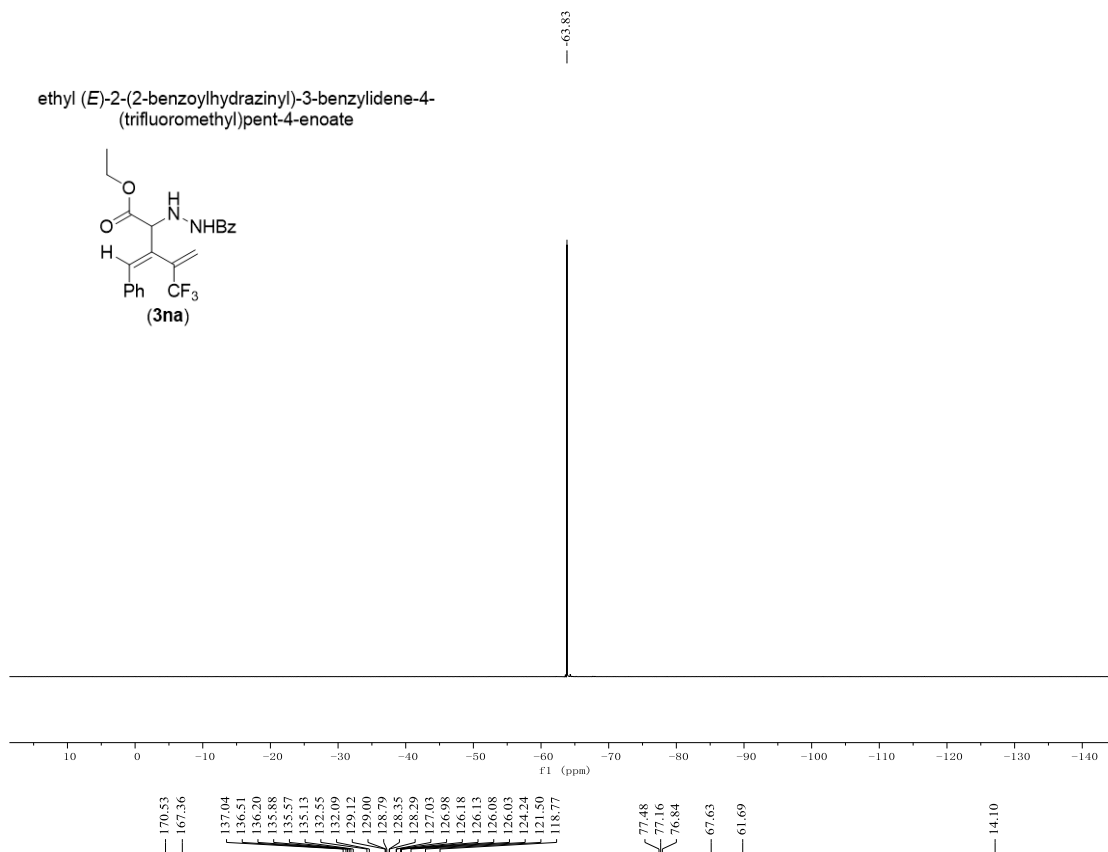

ethyl (*E*)-2-(2-benzoylhydrazinyl)-3-benzylidene-4-(trifluoromethyl)pent-4-enoate

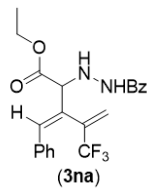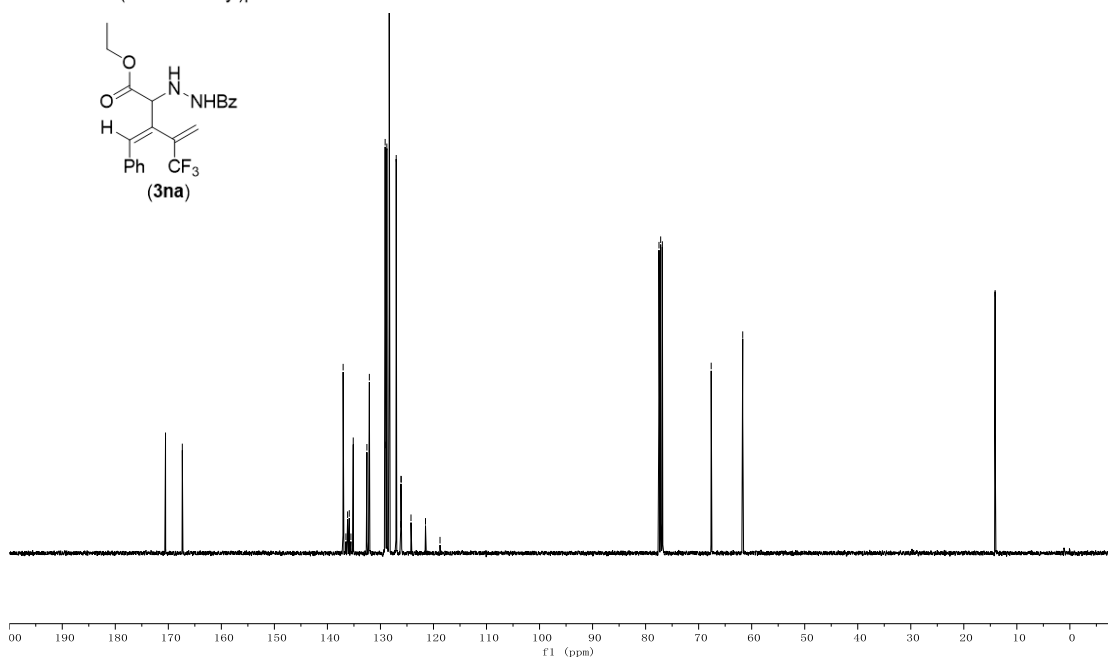

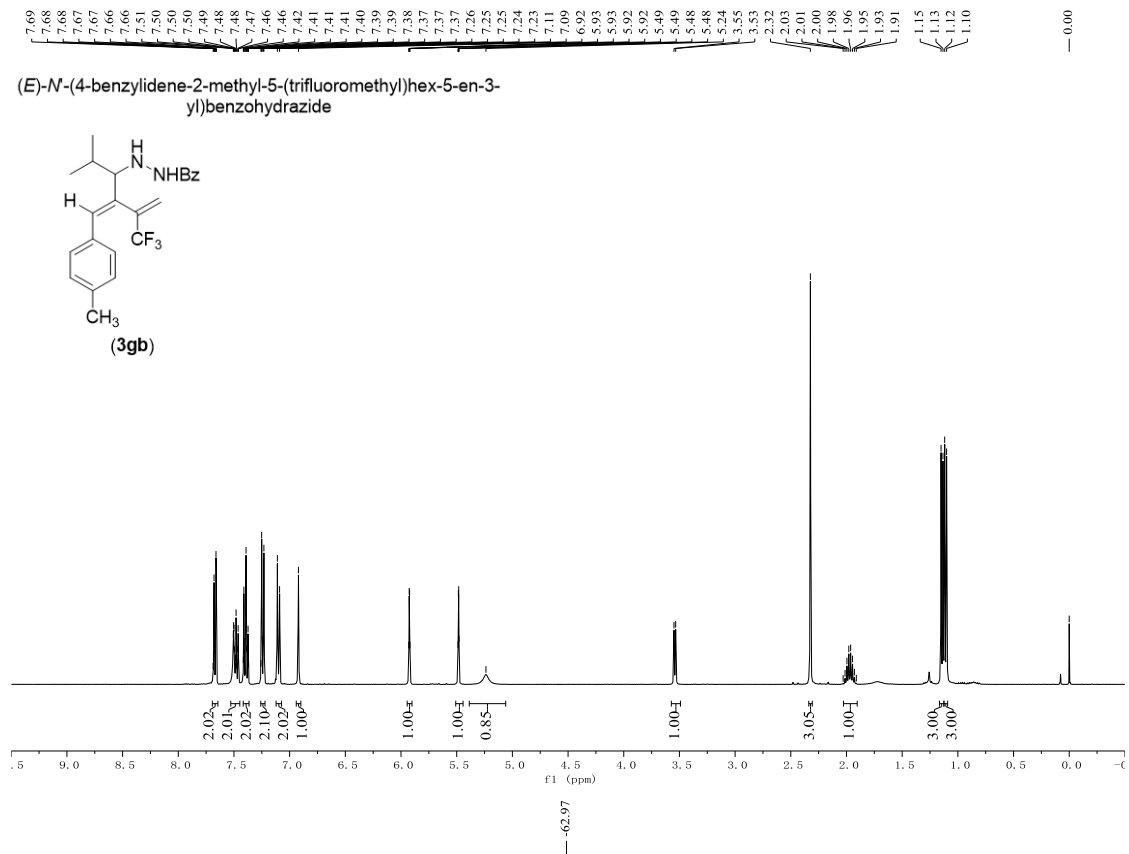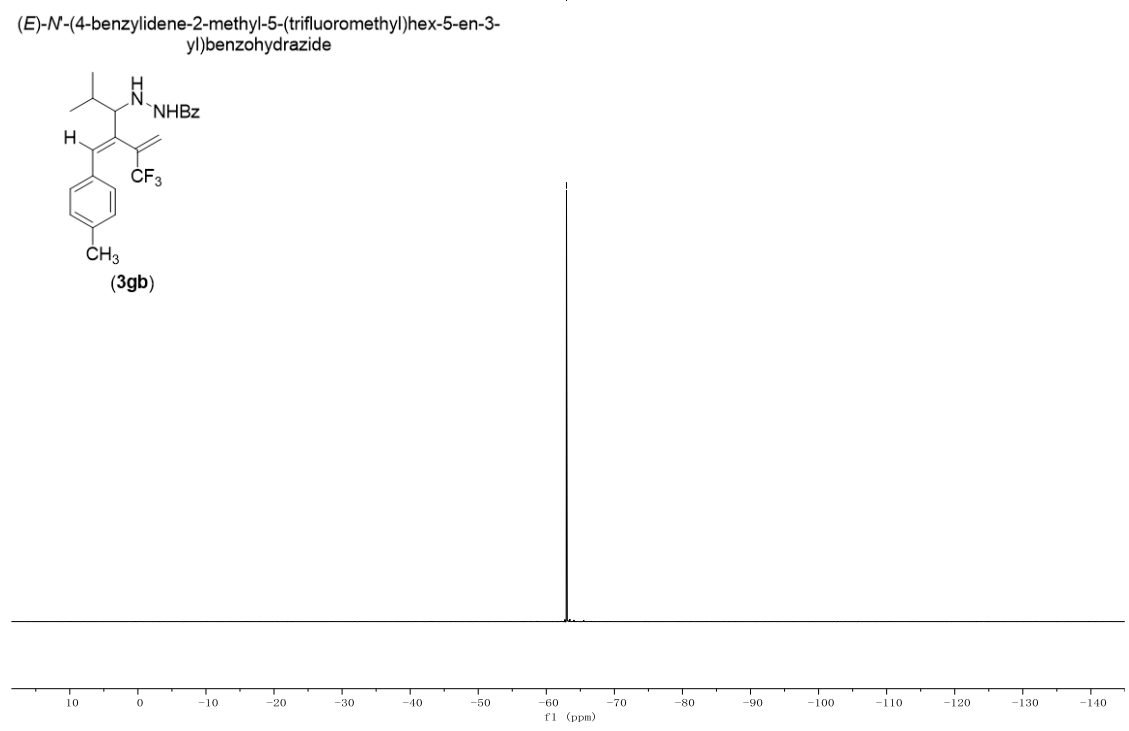

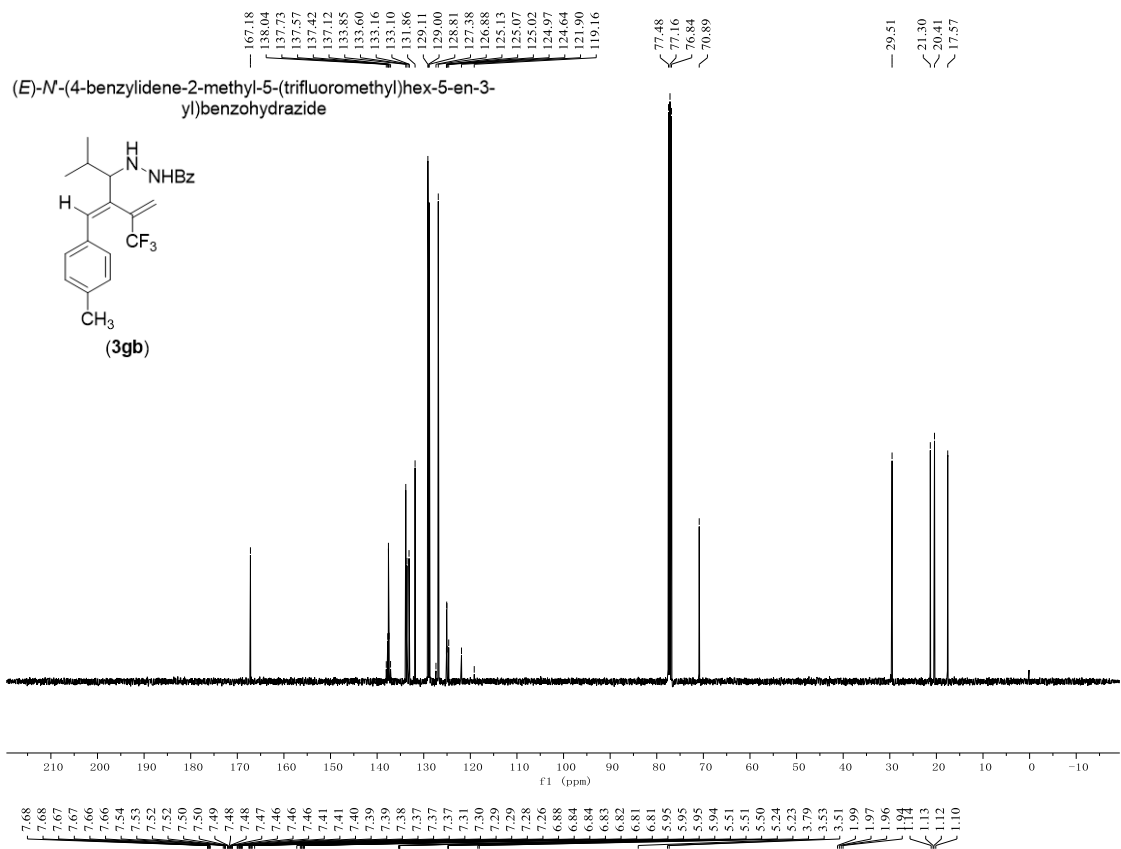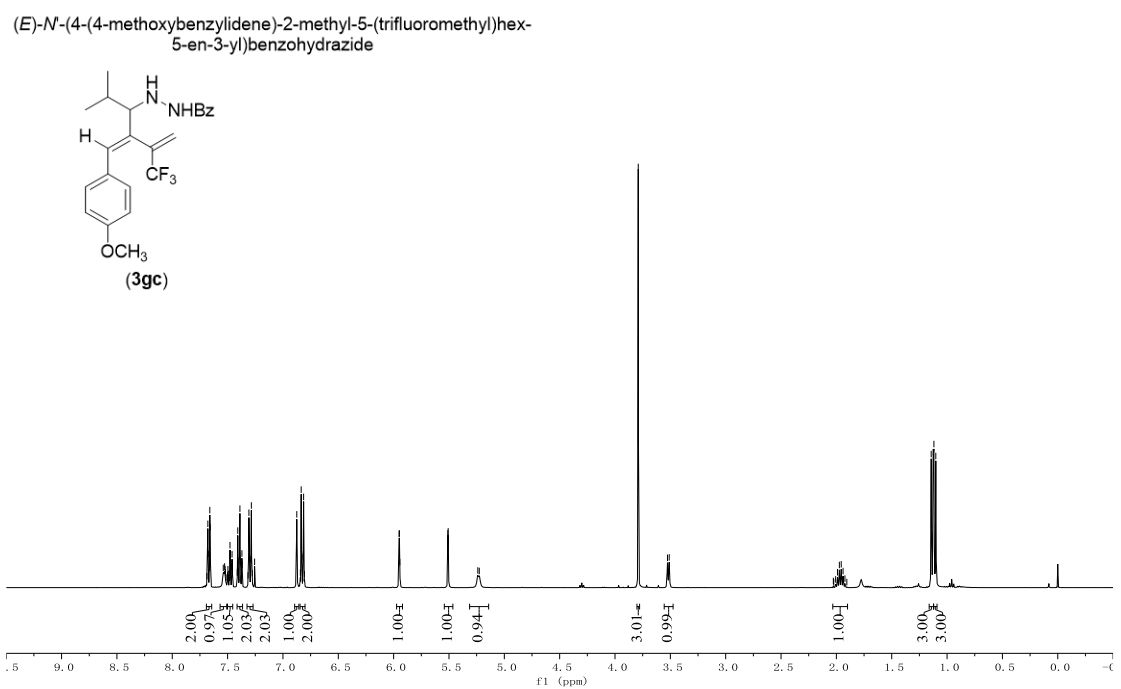

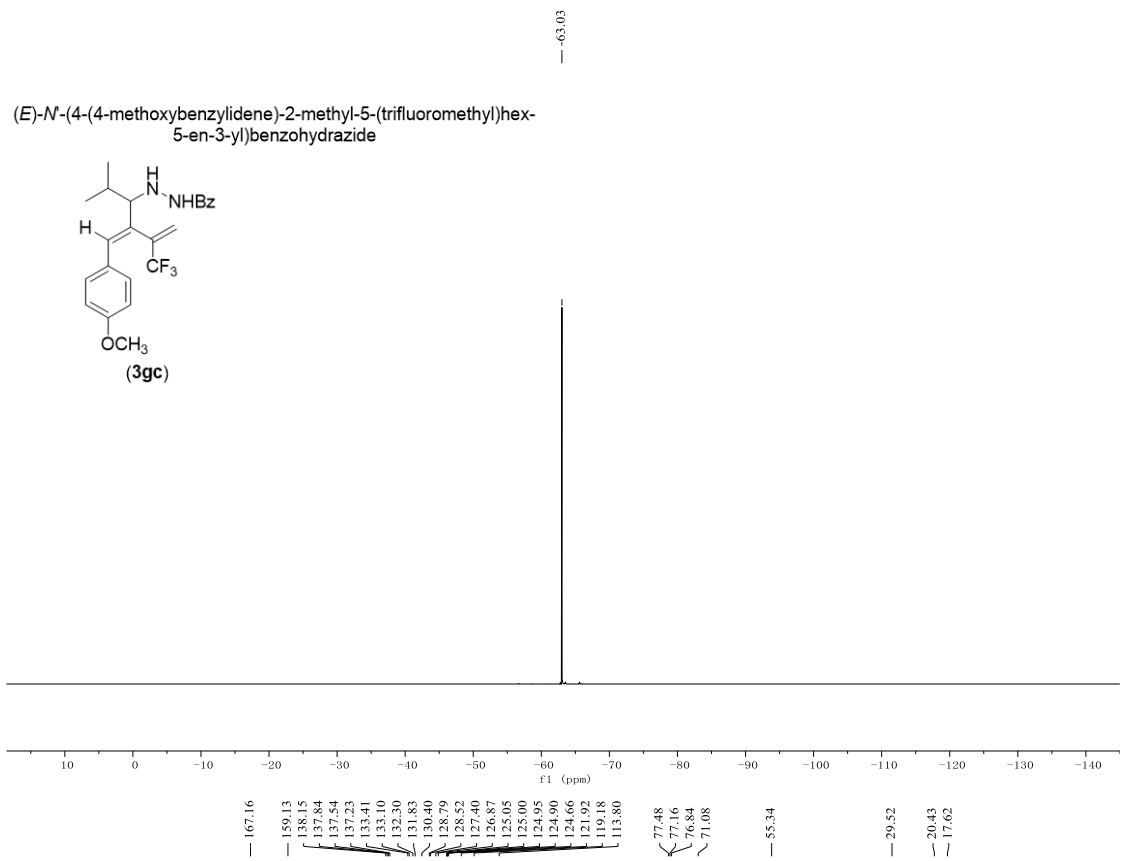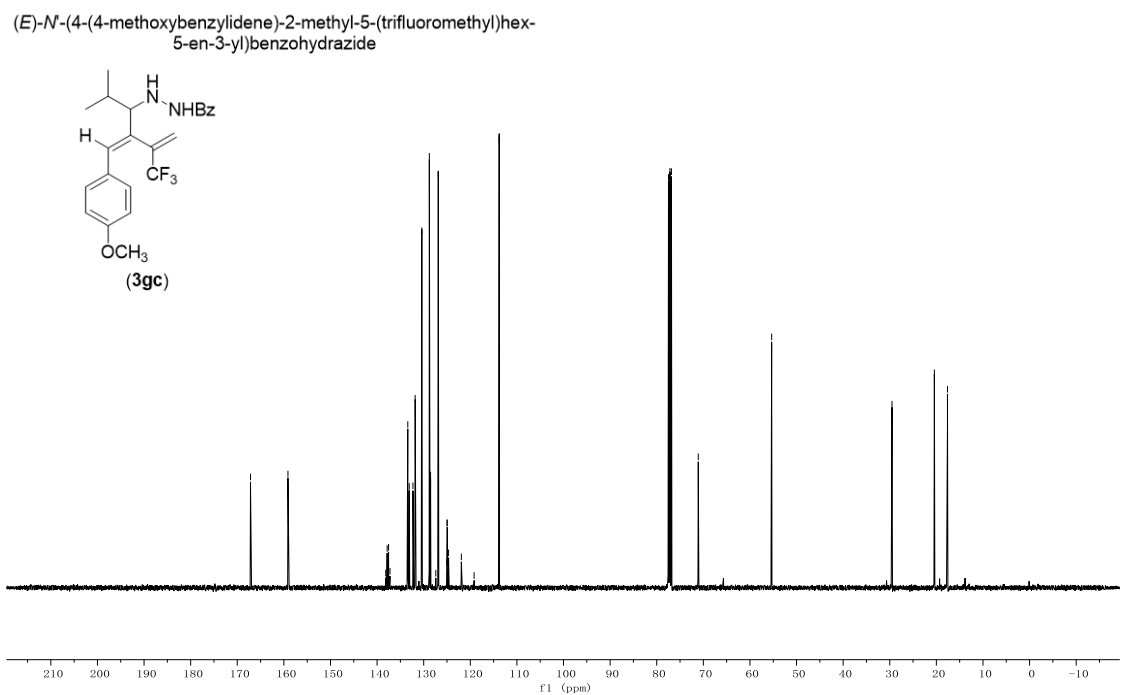

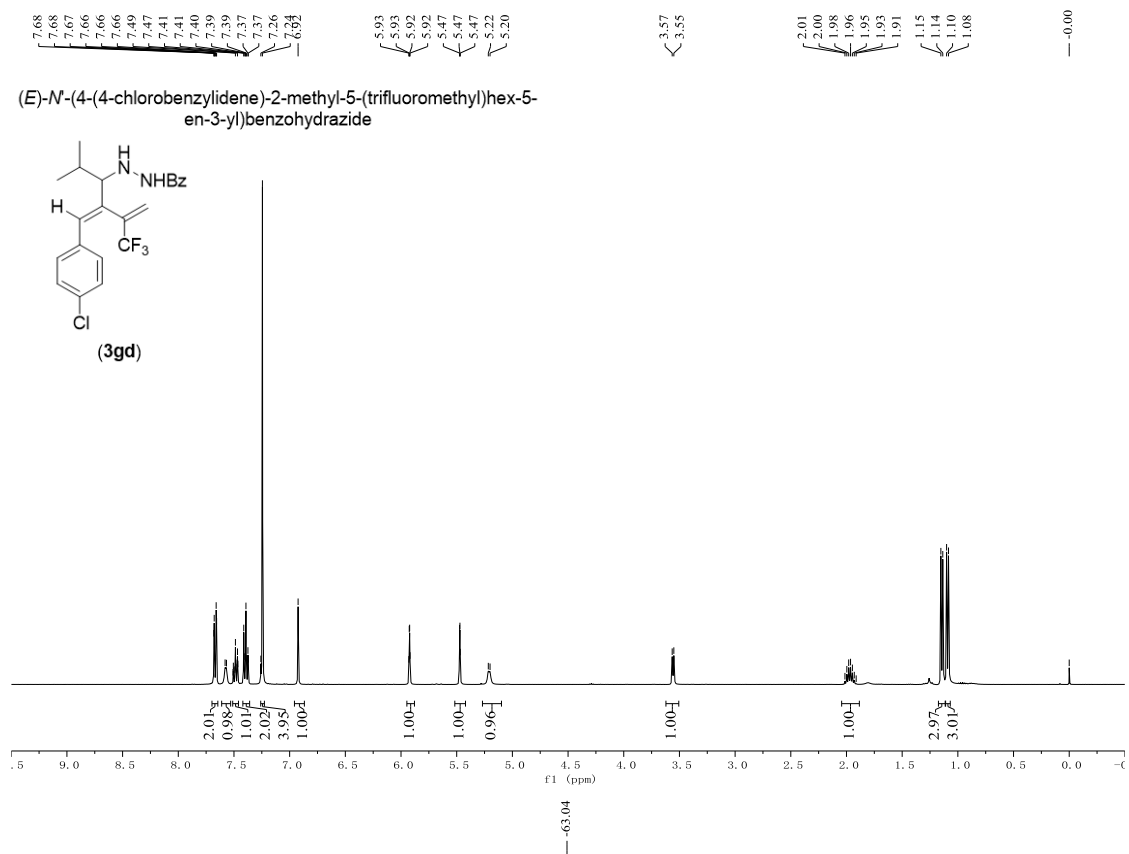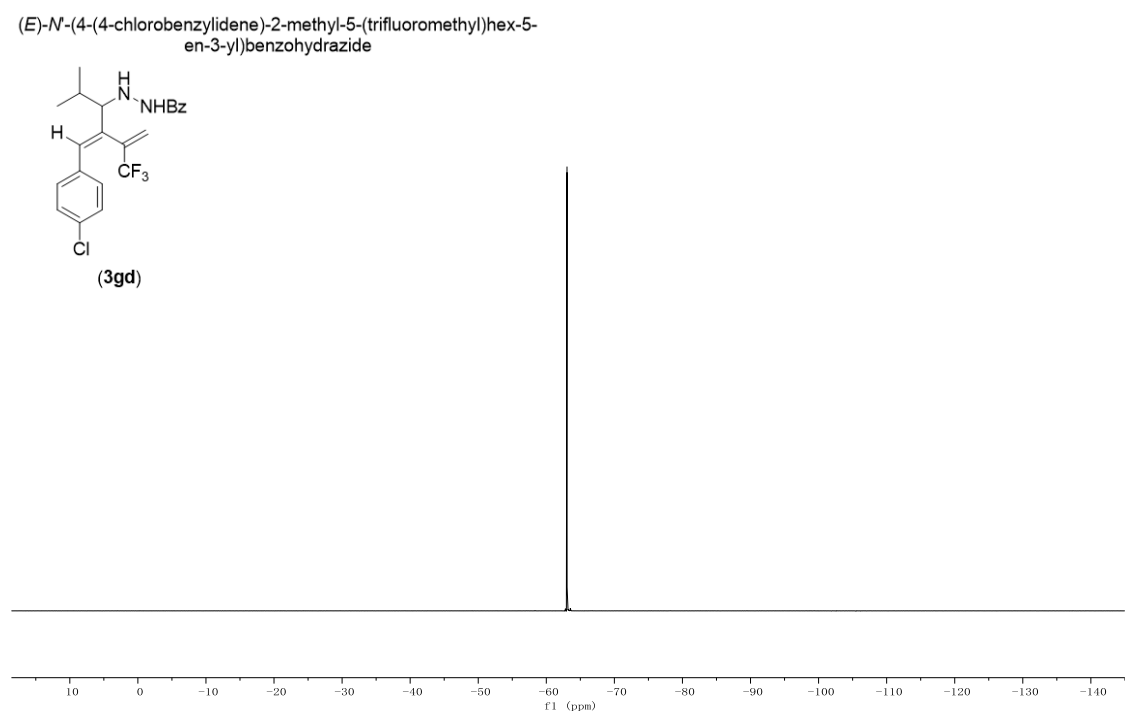



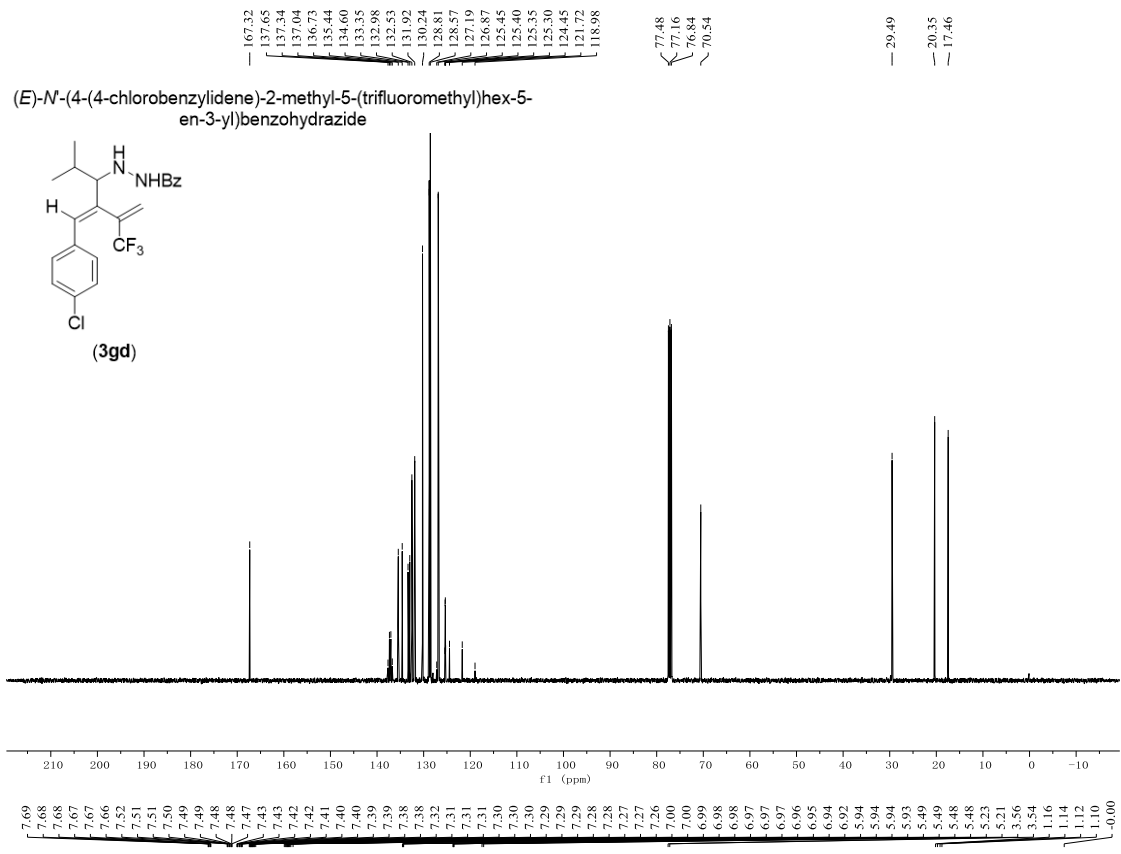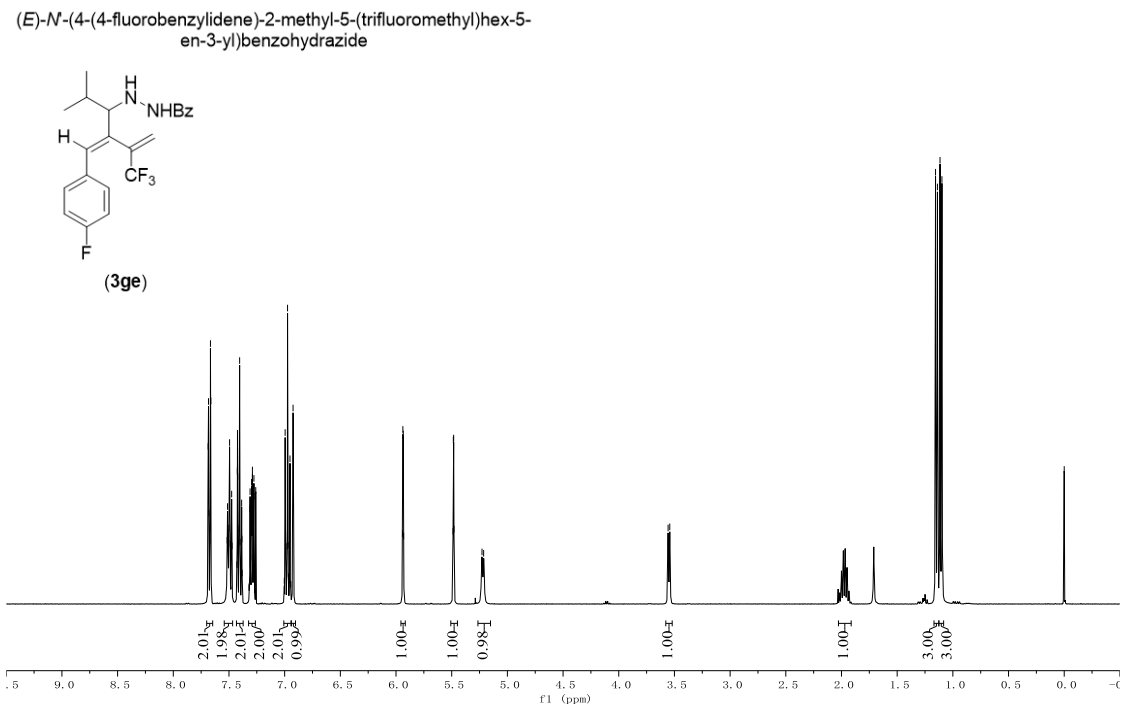

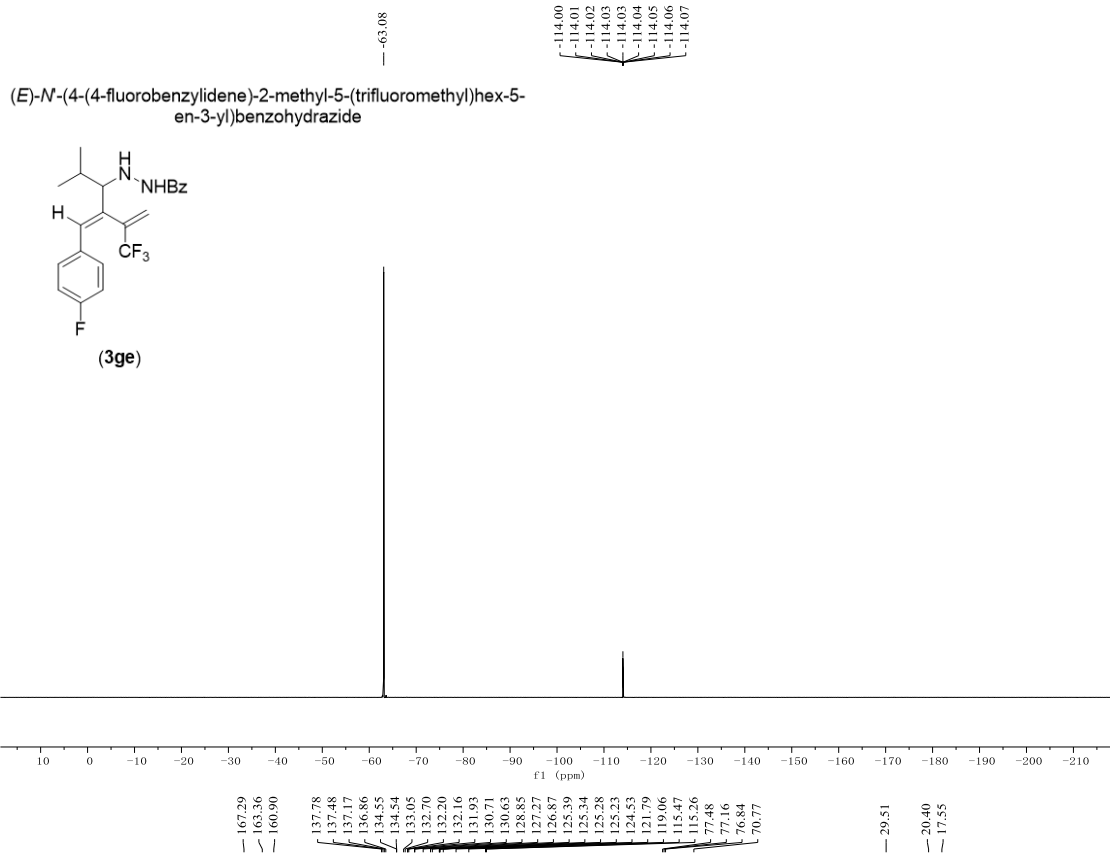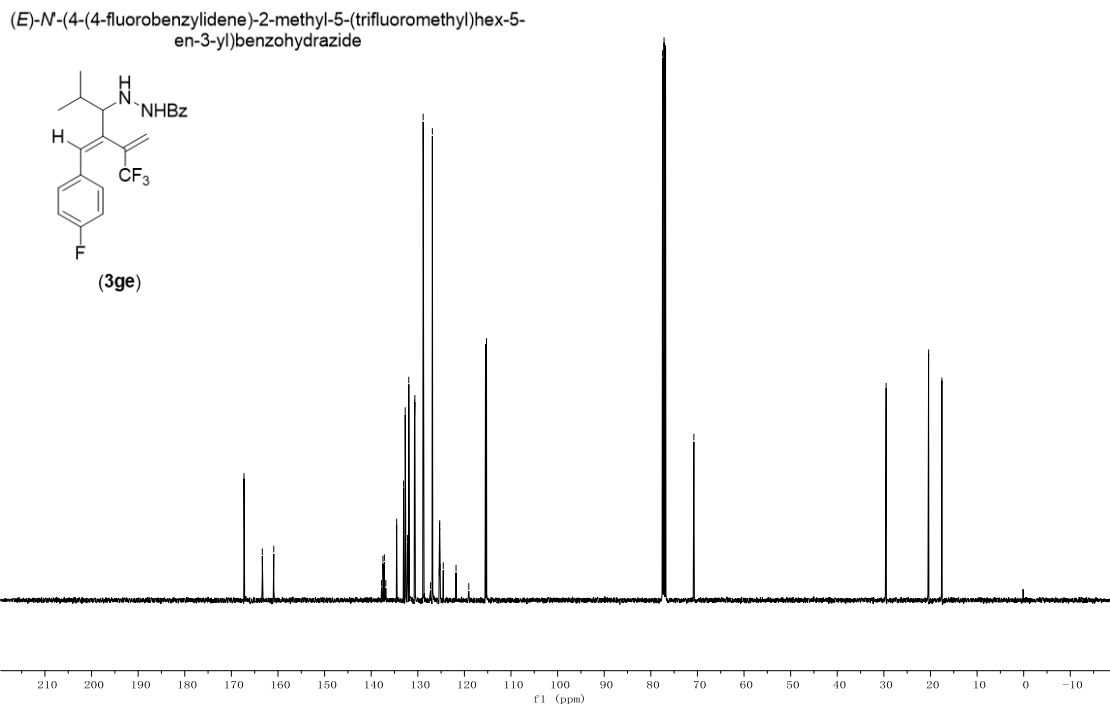

7.69  
7.68  
7.67  
7.66  
7.61  
7.49  
7.48  
7.47  
7.46  
7.45  
7.40  
7.40  
7.40  
7.38  
7.38  
7.37  
7.36  
7.36  
7.36  
7.24  
7.17  
7.17  
7.16  
7.16  
7.15  
7.14  
7.13  
7.13  
7.12  
7.12  
7.05  
7.05  
7.04  
7.04  
7.03  
7.03  
7.03  
7.02  
7.02  
6.94  
5.91  
5.91  
5.90  
5.47  
5.47  
5.47  
5.46  
5.46  
3.56  
3.55  
2.31  
2.00  
1.98  
1.98  
1.97  
1.96  
1.95  
1.95  
1.14  
1.11  
1.09

(E)-N-(2-methyl-4-(3-methylbenzylidene)-5-(trifluoromethyl)hex-5-en-3-yl)benzohydrazide

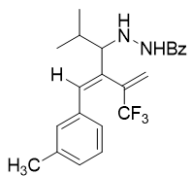

(3gf)

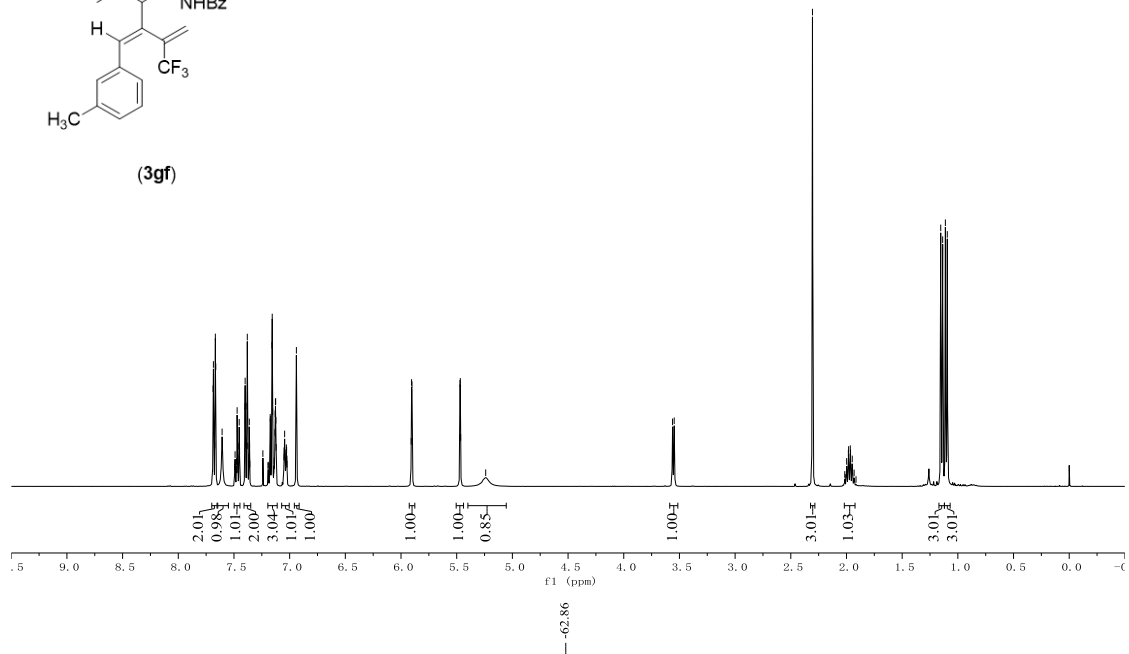

(E)-N-(2-methyl-4-(3-methylbenzylidene)-5-(trifluoromethyl)hex-5-en-3-yl)benzohydrazide

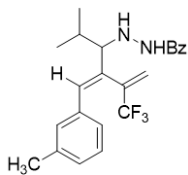

(3gf)

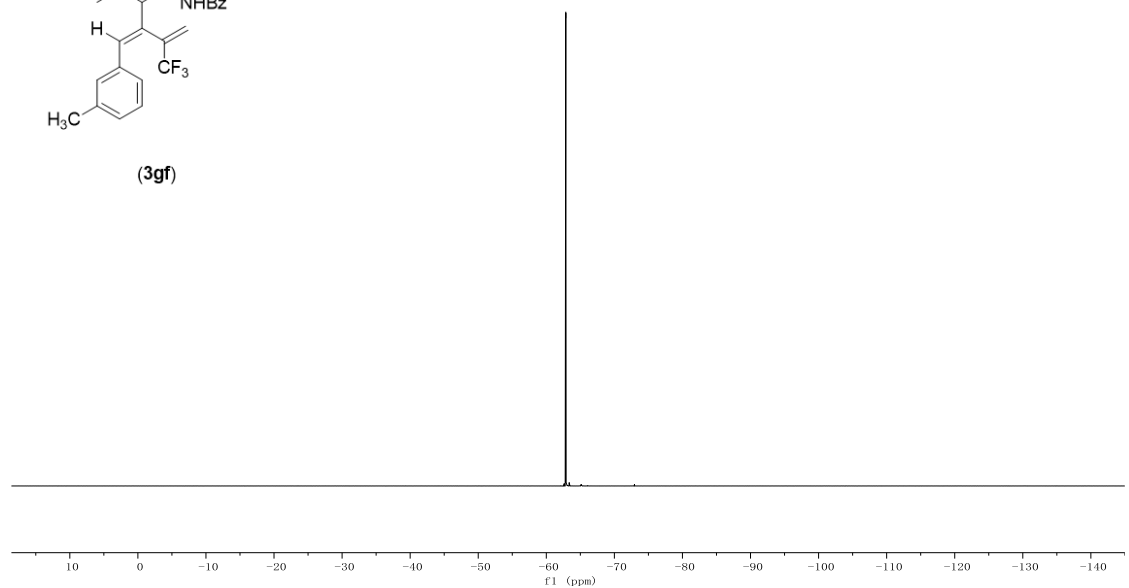

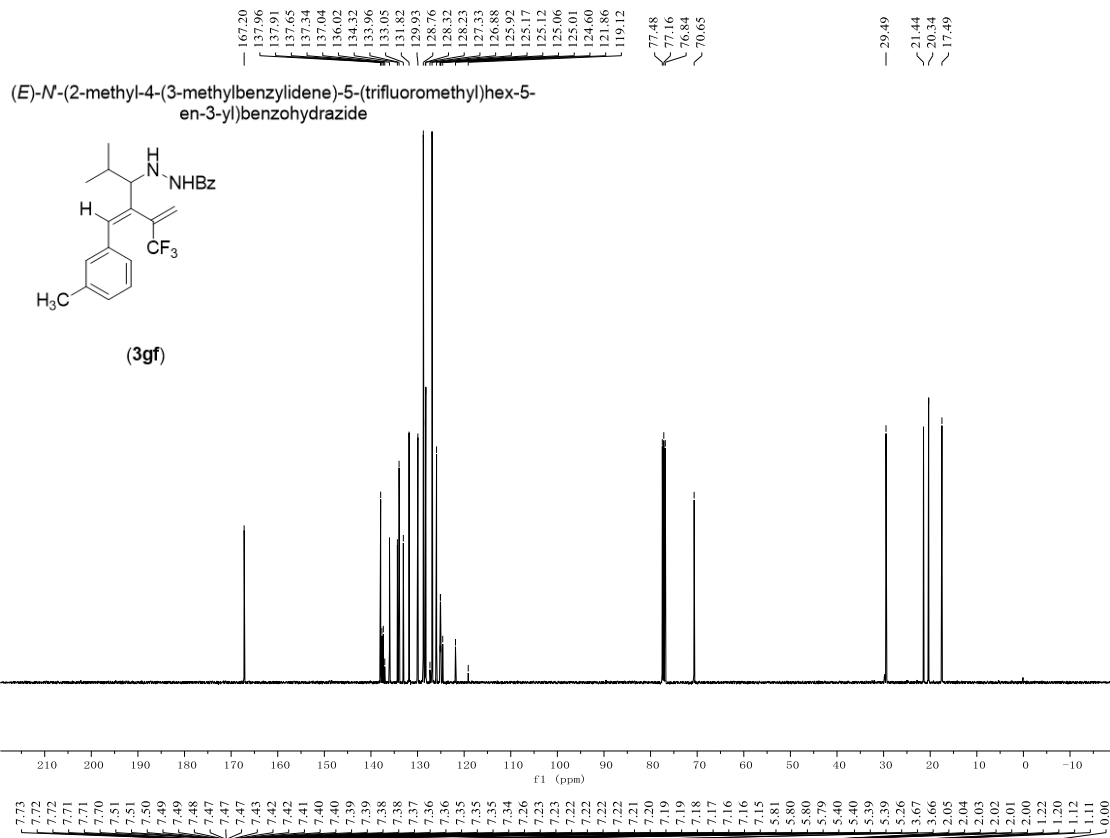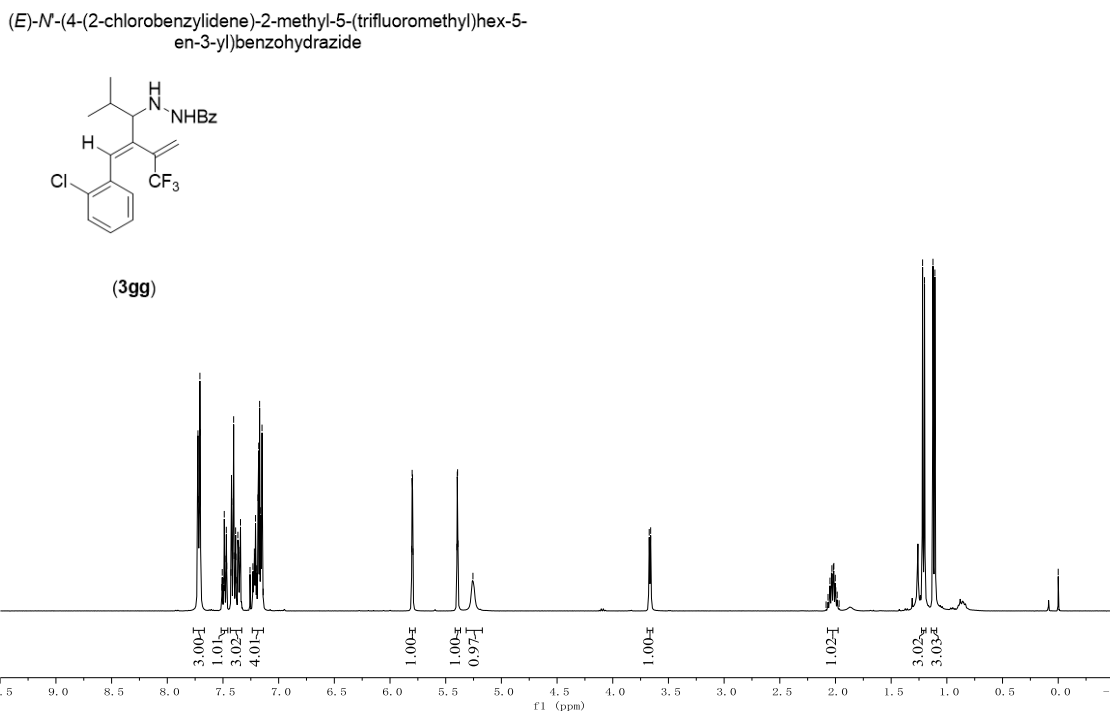

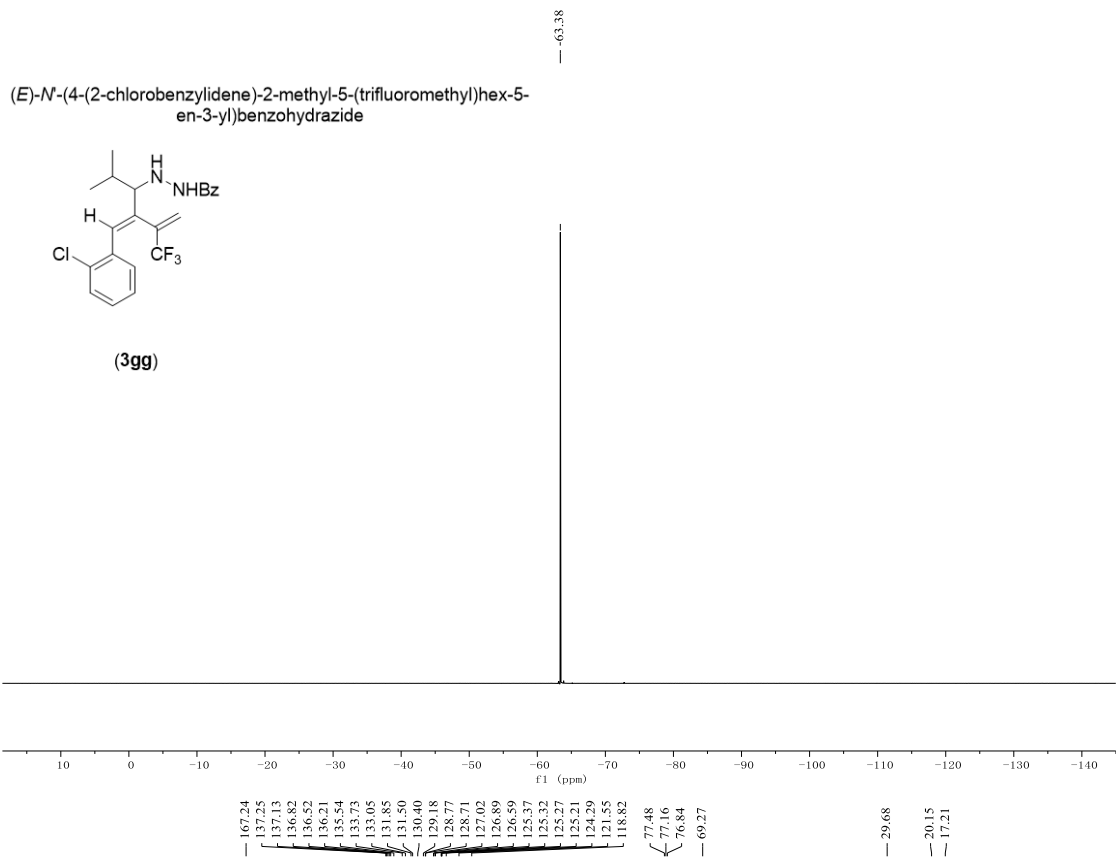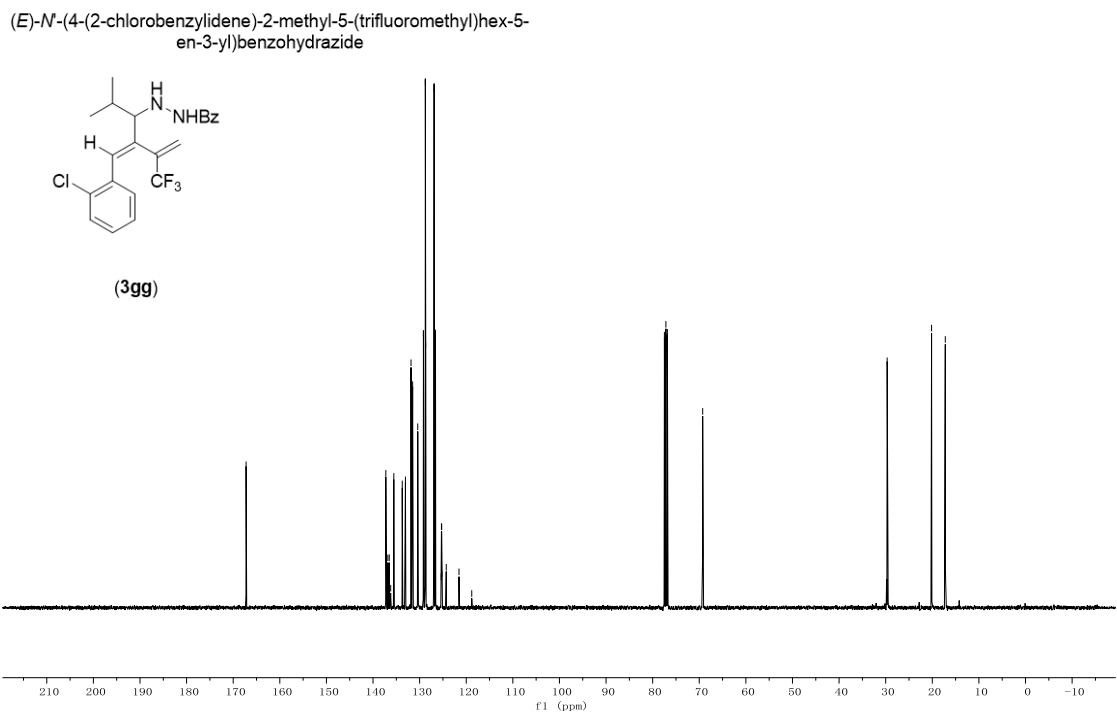

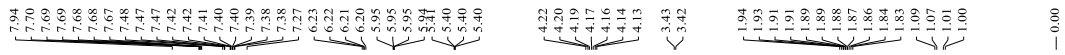

(E)-N-(6-hydroxy-2-methyl-4-(3,3,3-trifluoroprop-1-en-2-yl)hex-4-en-3-yl)benzohydrazide

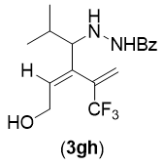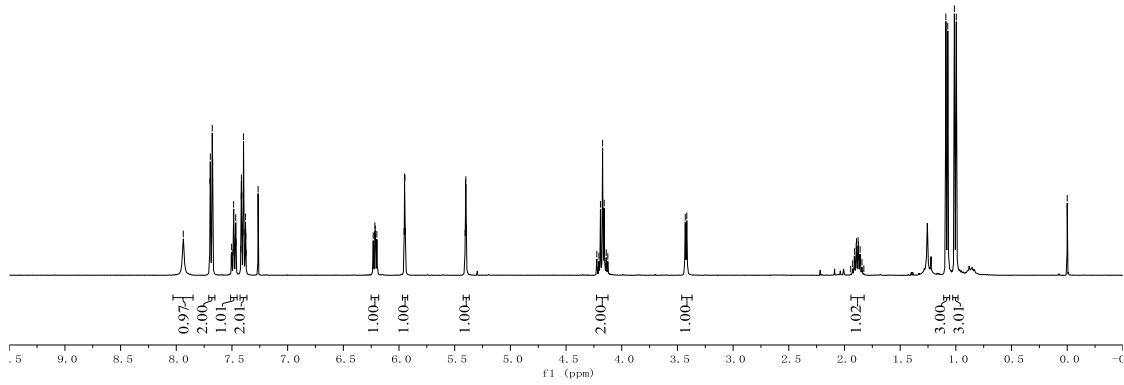

(E)-N-(6-hydroxy-2-methyl-4-(3,3,3-trifluoroprop-1-en-2-yl)hex-4-en-3-yl)benzohydrazide

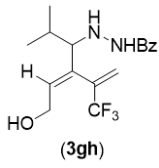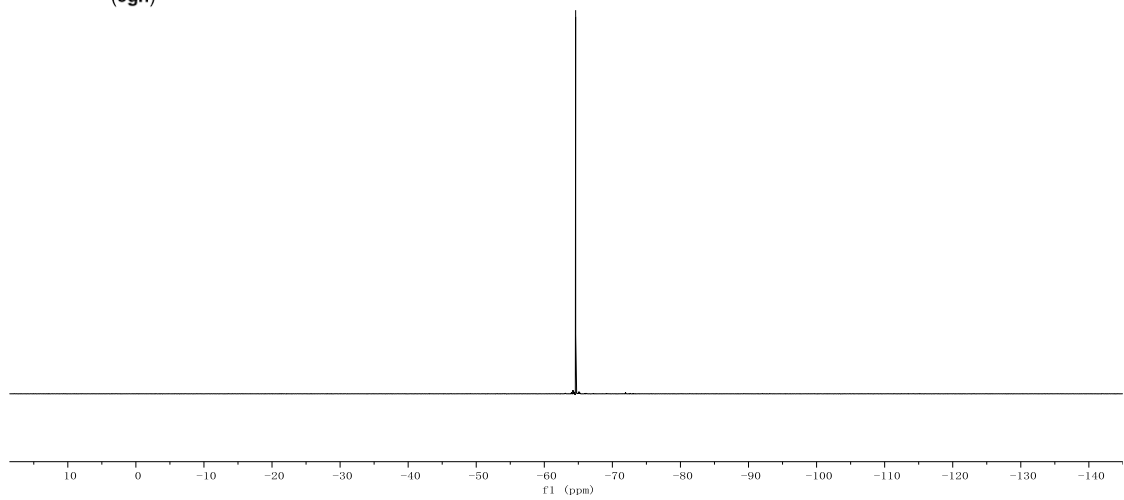

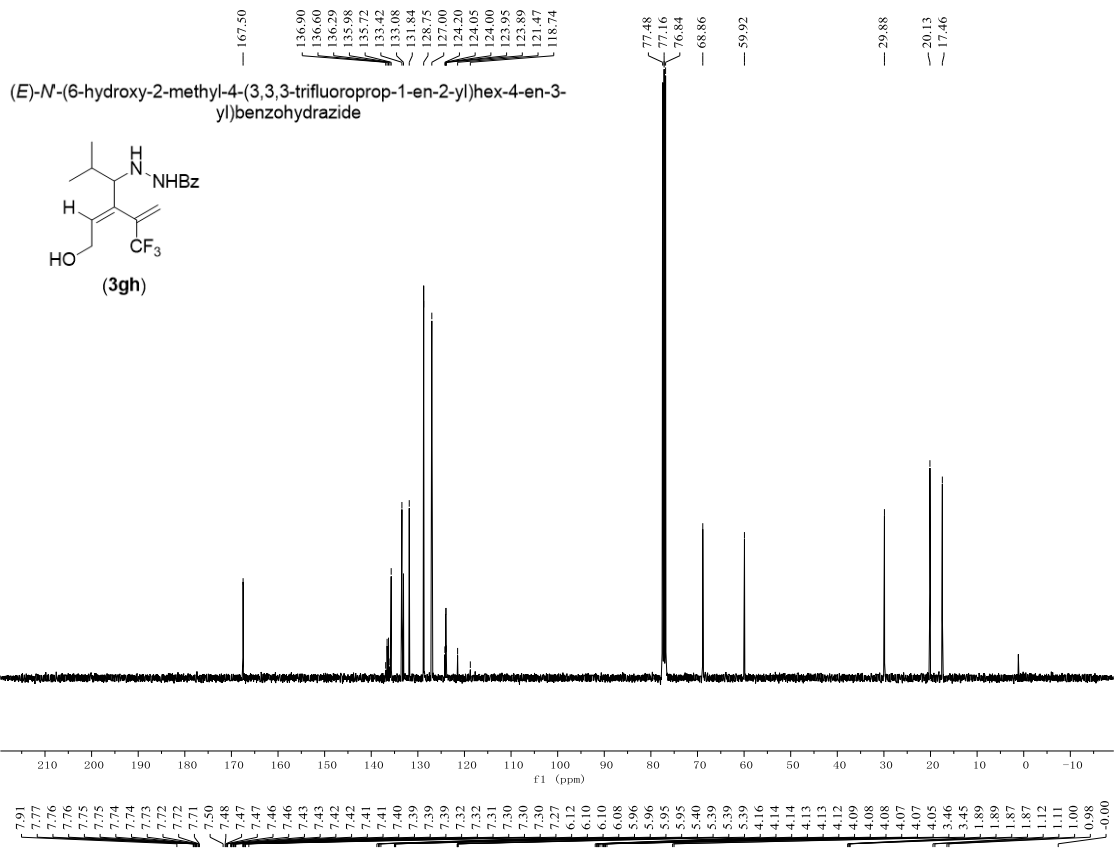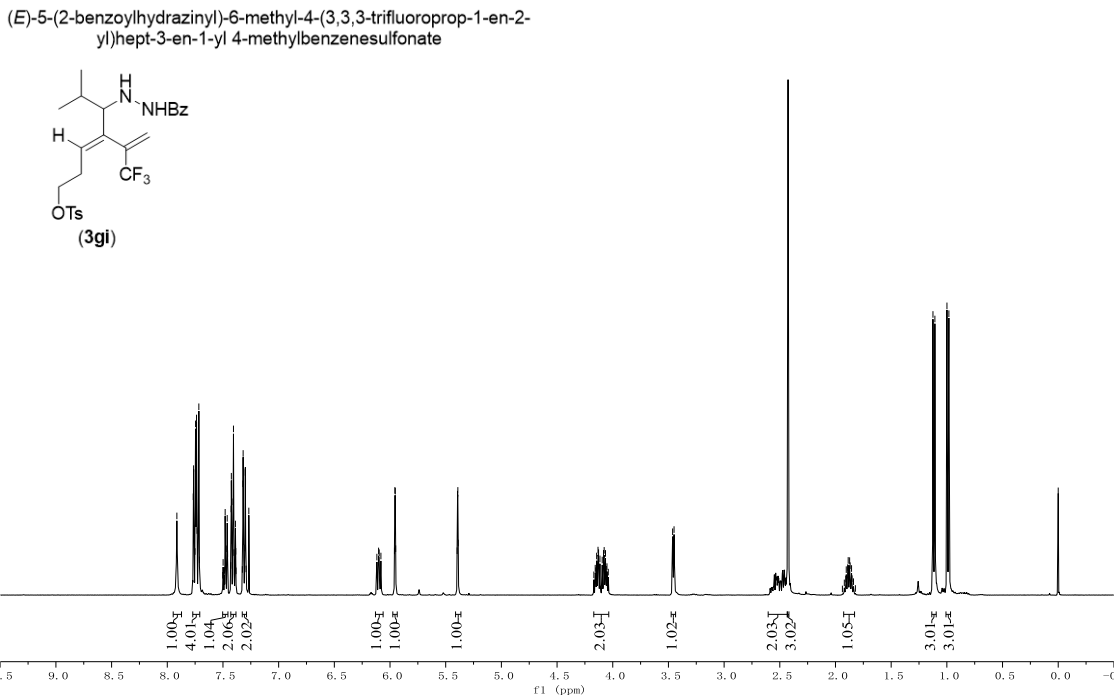

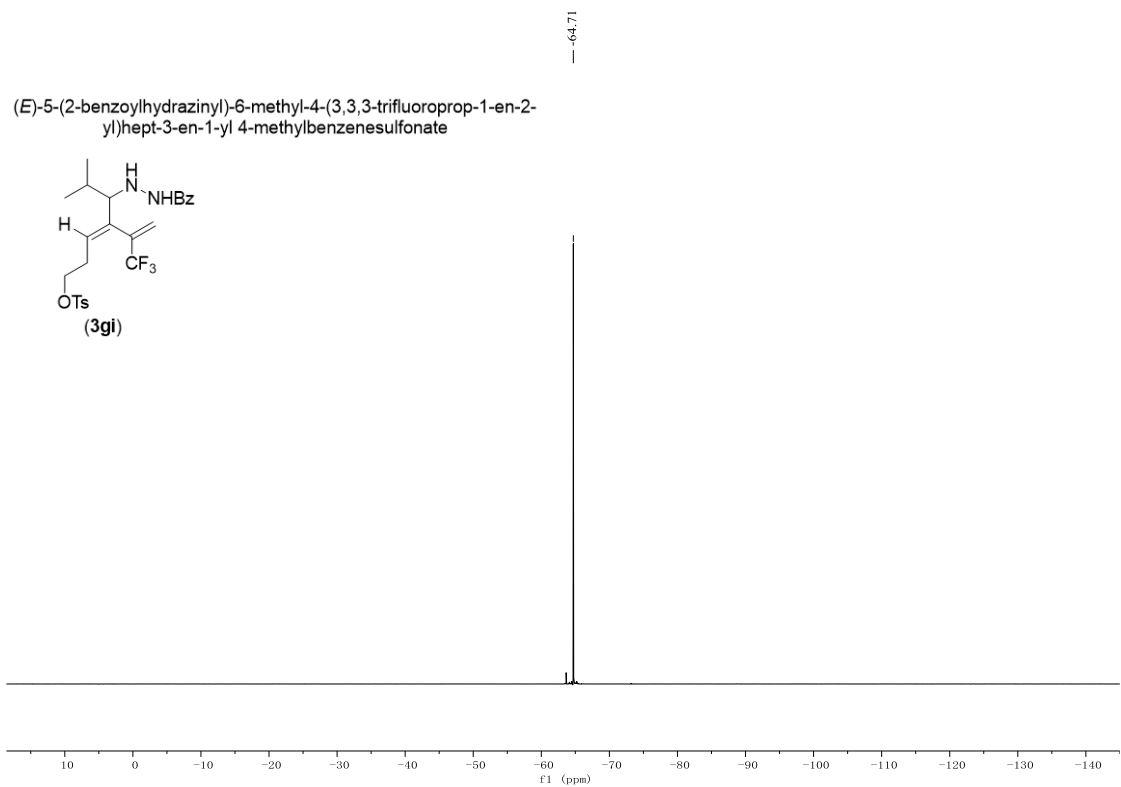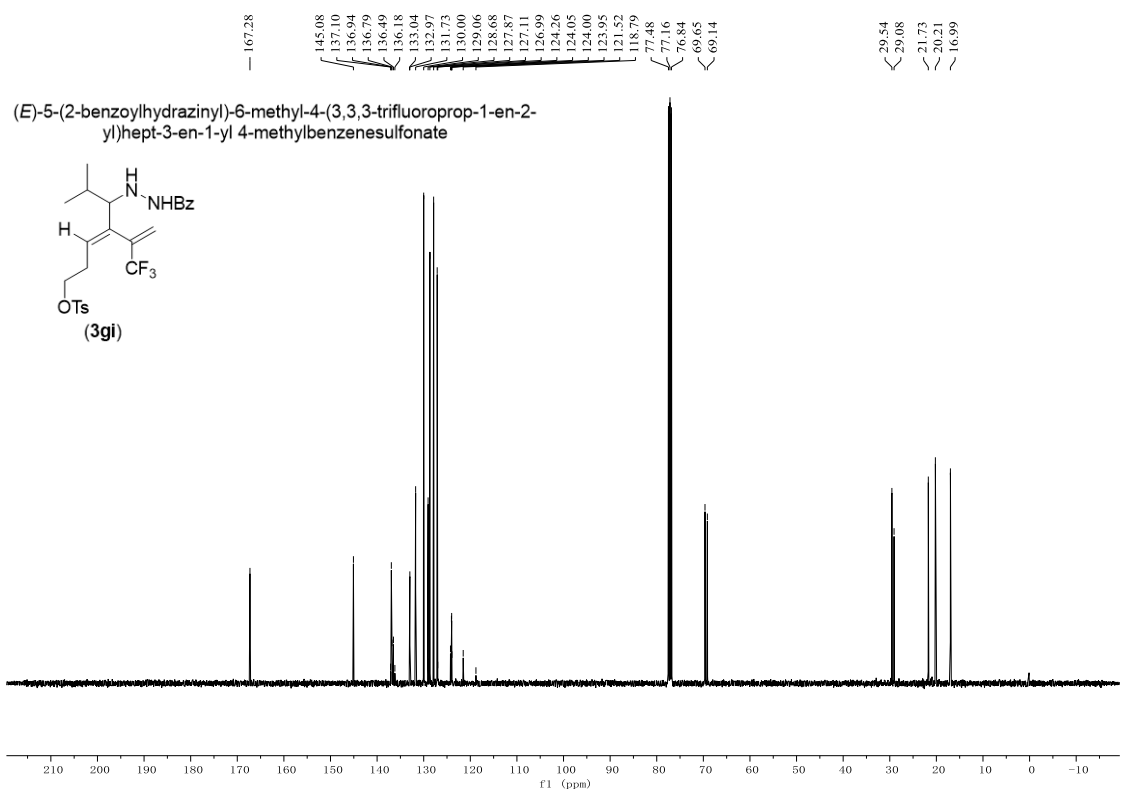



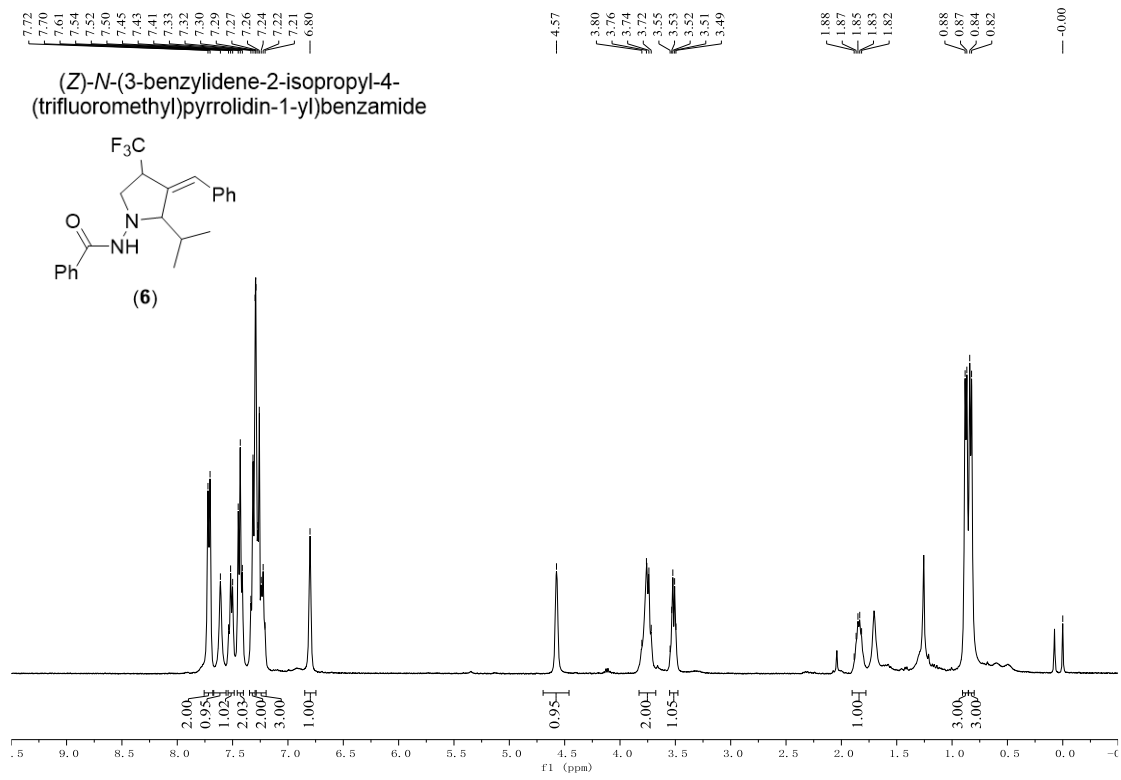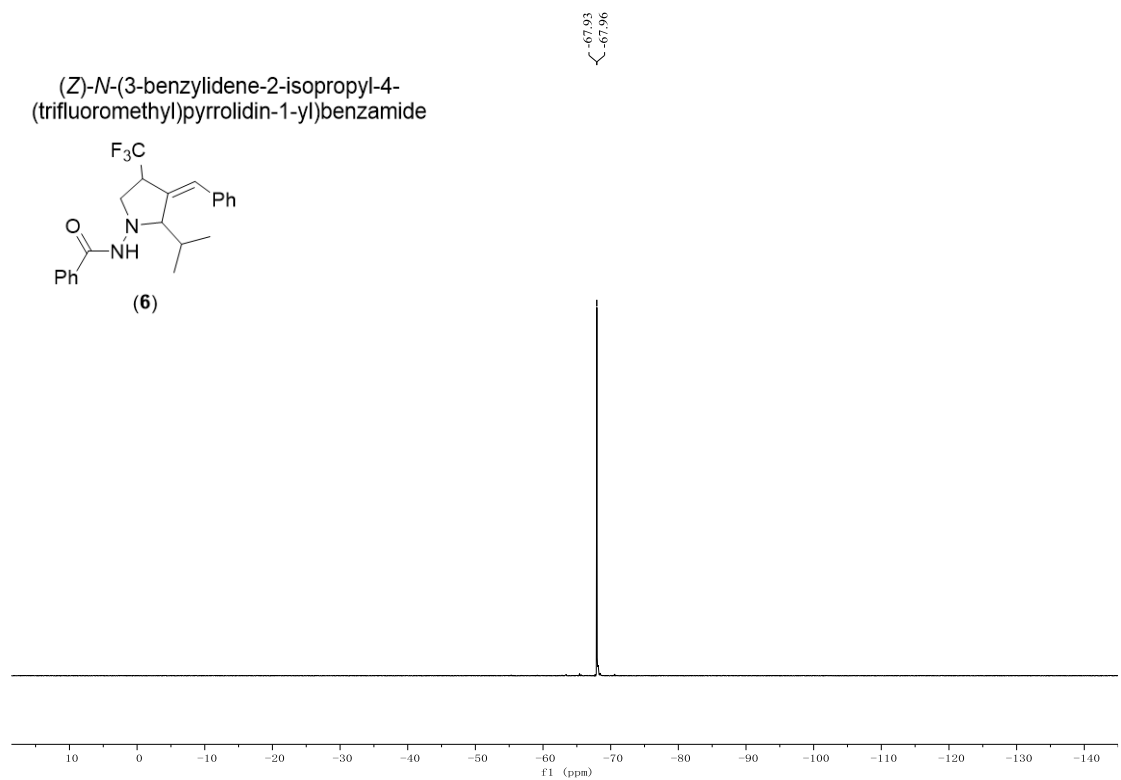

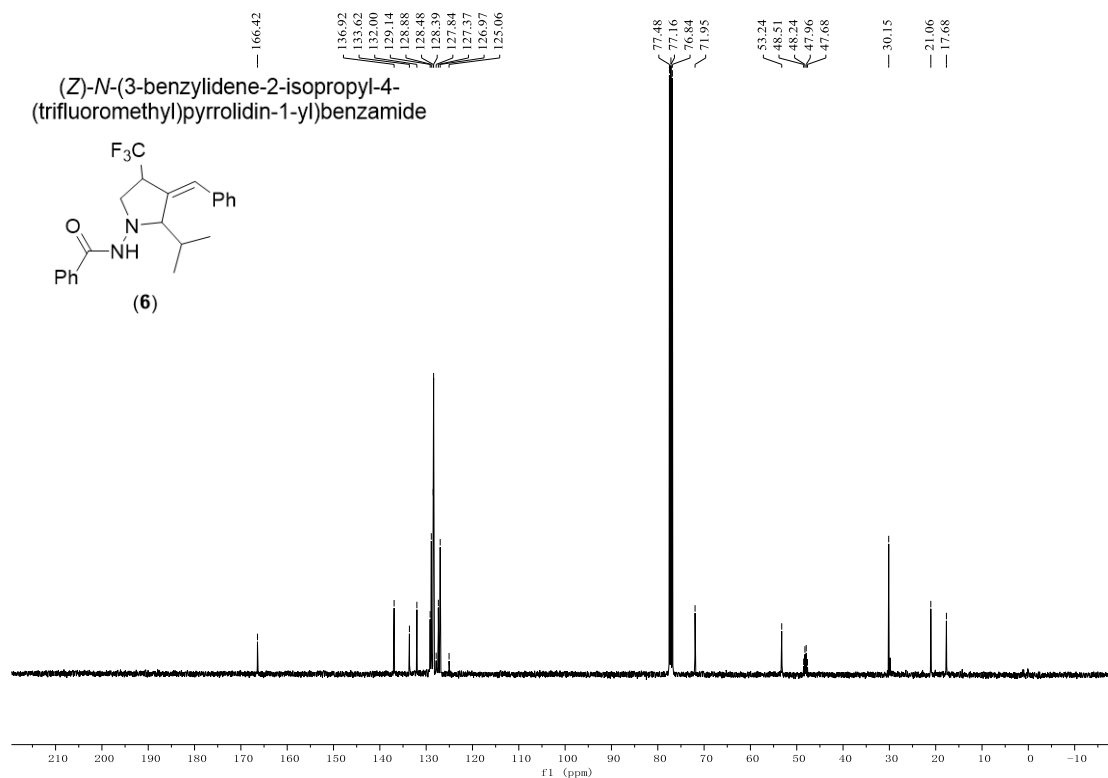

#### 4. References.

1. (a) S. Kobayashi, R. Hirabayashi, *J. Am. Chem. Soc.*, 1999, **121**, 6942–6943. (b) M. Rueping, M. Sudan Maji, H. Bas, P. Küçük, and I. Atodiresei, *Angew. Chem. Int. Ed.*, 2012, **51**, 12864–12868; *Angew. Chem.* 2012, **124**, 13036–13040.
2. C. Yang, Z.-L. Liu, D.-T. Dai, Q. Li, W.-W. Ma, M. Zhao and Y.-H. Xu, *Org. Lett.*, 2020, **22**, 1360–1367.
